# Supplementary material for: Iron-mediated ligand-to-metal charge transfer enables 1,2-diazidation of alkenes
Source: PubMed Central journal article supplement (PMC9789131; doi:10.1038/s41467-022-35344-9), 2022-12-23

# Supplementary information

**Iron-mediated ligand-to-metal charge transfer enables 1,2-diazidation of alkenes**

Zhang et al.

# Table of Contents

|                                                                                             |           |
|---------------------------------------------------------------------------------------------|-----------|
| <b>1. Supplementary Methods.....</b>                                                        | <b>3</b>  |
| <b>2. Supplementary Discussion.....</b>                                                     | <b>4</b>  |
| <b>2.1 Reaction condition optimization.....</b>                                             | <b>4</b>  |
| <b>2.2 General procedure for alkene diazidation reaction.....</b>                           | <b>8</b>  |
| <b>2.3 Synthetic utilizations.....</b>                                                      | <b>25</b> |
| <b>2.4. Mechanistic studies.....</b>                                                        | <b>28</b> |
| <b>3. Supplementary Notes.....</b>                                                          | <b>31</b> |
| <b>3.1 Copies of <sup>1</sup>H NMR, <sup>13</sup>C NMR, <sup>19</sup>F NMR spectra.....</b> | <b>31</b> |

## 1. Supplementary Methods

All reactions were performed in flame-dried glassware using conventional Schlenk techniques under a static pressure of nitrogen unless stated otherwise. Liquids and solutions were transferred with syringes. Solvents were dried and purified following standard procedures. Technical grade solvents for extraction or chromatography (*n*-pentane, ethyl acetate, and ethanol) were distilled prior to use. Analytical thin layer chromatography (TLC) was performed on ALUGRAM<sup>®</sup> Xtra SIL G/UV<sub>254</sub> TLC-Sheets by Macherey-Nagel. Flash column chromatography was performed on silica gel 60 (40-63 μm, 230-400 mesh, ASTM) by Grace using the indicated solvents. <sup>1</sup>H, <sup>13</sup>C, and <sup>19</sup>F NMR spectra were recorded in CDCl<sub>3</sub> on Bruker AV400 or AV500 instruments. Chemical shifts are reported to 0.01 ppm for <sup>1</sup>H NMR to 0.01 ppm for <sup>13</sup>C NMR and <sup>19</sup>F NMR spectra. Reference peaks for chloroform in <sup>1</sup>H NMR and <sup>13</sup>C NMR spectra were set at 7.26 ppm and 77.0 ppm, respectively. Data were reported as follows: chemical shift, multiplicity (s = singlet, d = doublet, t = triplet, q = quartet, m = multiplet), coupling constants (Hz), and integration. Gas liquid chromatography (GLC) was performed on an Agilent Technologies 7820A gas chromatograph equipped with a HP-5 capillary column (30 m × 0.32 mm, 0.25 μm film thickness) by Agilent Technologies/CS-Chromatographie Service using the following program: N<sub>2</sub> carrier gas, injection temperature 250 °C, detector temperature 300 °C, flow rate: 1.7 mL/min; temperature program: start temperature 40 °C, heating rate 10 °C/min, end temperature 280 °C for 10 min.

## 2. Supplementary Discussion

### 2.1 Reaction condition optimization

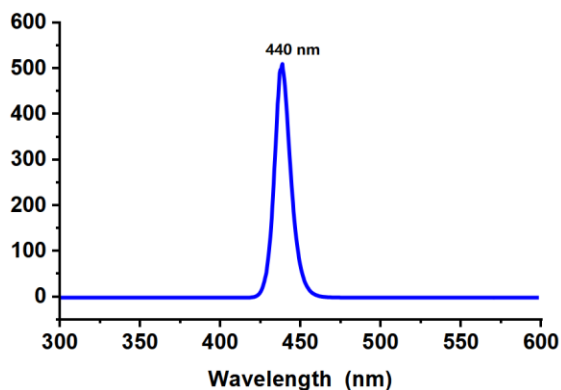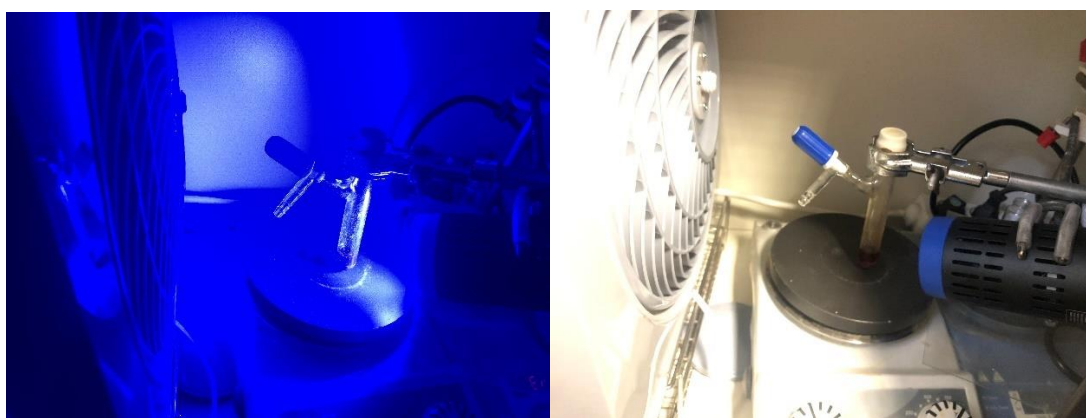

**Supplementary Figure 1.** Emission spectra of the blue LED light and typical reaction setup.

### Supplementary Table 1. Cu catalyst screening

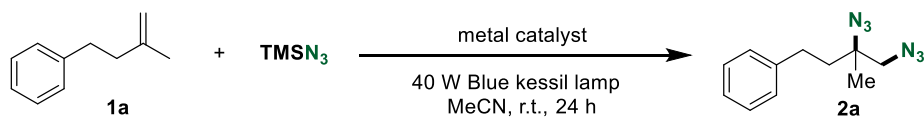

| entry | copper salt           | yield(%) <sup>b</sup> |
|-------|-----------------------|-----------------------|
| 1     | CuCl <sub>2</sub>     | 0                     |
| 2     | CuCl                  | 0                     |
| 3     | CuBr <sub>2</sub>     | 0                     |
| 4     | CuBr                  | 0                     |
| 5     | Cu(OAc) <sub>2</sub>  | 0                     |
| 6     | Cu(acac) <sub>2</sub> | 0                     |
| 7     | CuCN                  | 0                     |

[a] Reaction conditions: **1a** (0.20 mmol, 1.0 equiv), TMSN<sub>3</sub> (1.0 mmol, 5.0 equiv), Cu catalyst (0.24 mmol, 1.2 equiv) and CH<sub>3</sub>CN (2 mL), blue

LEDs, 24 h. [b] Yields were determined by analysis of the crude  $^1\text{H}$  NMR spectra using  $\text{CH}_2\text{Br}_2$  as an internal standard.

### Supplementary Table 2. Mn catalyst screening

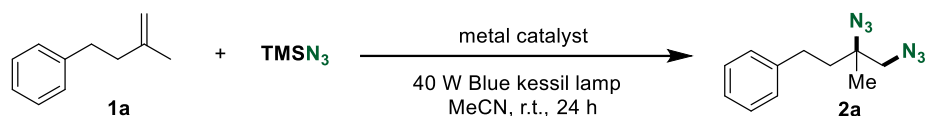

| entry | manganese salt                    | yield(%) <sup>b</sup> |
|-------|-----------------------------------|-----------------------|
| 1     | $\text{Mn}_2(\text{CO})_{10}$     | 0                     |
| 2     | $\text{Mn}(\text{CO})_5\text{Br}$ | 0                     |
| 3     | $\text{MnBr}_2$                   | 0                     |
| 4     | $\text{Mn}(\text{OAc})_3$         | 21                    |
| 5     | $\text{Mn}(\text{OAc})_2$         | 0                     |
| 6     | $\text{Mn}(\text{CO})_5\text{I}$  | 0                     |
| 7     | $\text{Mn}(\text{OTf})_2$         | 0                     |

[a] Reaction conditions: **1a** (0.20 mmol, 1.0 equiv),  $\text{TMSN}_3$  (1.0 mmol, 5.0 equiv), Mn catalyst (0.24 mmol, 1.2 equiv) and  $\text{CH}_3\text{CN}$  (2 mL), blue LEDs, 24 h. [b] Yields were determined by analysis of the crude  $^1\text{H}$  NMR spectra using  $\text{CH}_2\text{Br}_2$  as an internal standard.

### Supplementary Table 3. Co catalyst screening

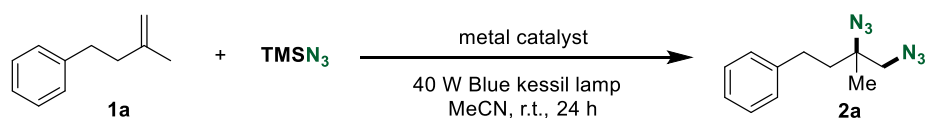

| entry | cobalt salt                                         | yield(%) <sup>b</sup> |
|-------|-----------------------------------------------------|-----------------------|
| 1     | $\text{CoCl}_2$                                     | 0                     |
| 2     | $\text{CoBr}_2$                                     | 0                     |
| 3     | $\text{CoI}_2$                                      | 0                     |
| 4     | $\text{CoCl}_2 \cdot \text{dppe}$                   | 0                     |
| 5     | $\text{Co}(\text{OAc})_2 \cdot 4\text{H}_2\text{O}$ | 0                     |
| 6     | $\text{Co}(\text{salen})\text{Cl}$                  | 0                     |
| 7     | $\text{Cu}(\text{acac})_2$                          | 0                     |

[a] Reaction conditions: **1a** (0.20 mmol, 1.0 equiv),  $\text{TMSN}_3$  (1.0 mmol, 5.0 equiv), Co catalyst (0.24 mmol, 1.2 equiv) and  $\text{CH}_3\text{CN}$  (2 mL), blue LEDs, 24 h. [b] Yields were determined by analysis of the crude  $^1\text{H}$

NMR spectra using CH<sub>2</sub>Br<sub>2</sub> as an internal standard.

---

#### Supplementary Table 4. Fe catalyst screening

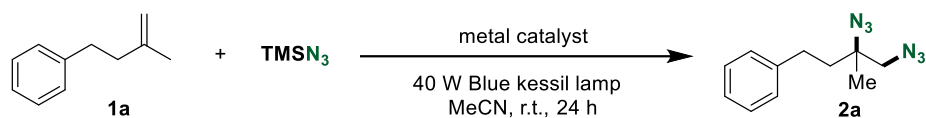

| entry | iron salt                                            | yield(%) <sup>b</sup> |
|-------|------------------------------------------------------|-----------------------|
| 1     | FeCl <sub>3</sub>                                    | 6                     |
| 2     | Fe(acac) <sub>3</sub>                                | 8                     |
| 3     | Fe(NO <sub>3</sub> ) <sub>3</sub> ·9H <sub>2</sub> O | 85                    |
| 4     | FeCl <sub>2</sub>                                    | 5                     |

[a] Reaction conditions: **1a** (0.20 mmol, 1.0 equiv), TMSN<sub>3</sub> (1.0 mmol, 5.0 equiv), Fe catalyst (0.24 mmol, 1.2 equiv) and CH<sub>3</sub>CN (2 mL), blue LEDs, 24 h. [b] Yields were determined by analysis of the crude <sup>1</sup>H NMR spectra using CH<sub>2</sub>Br<sub>2</sub> as an internal standard.

---

#### Supplementary Table 5. Solvent screening

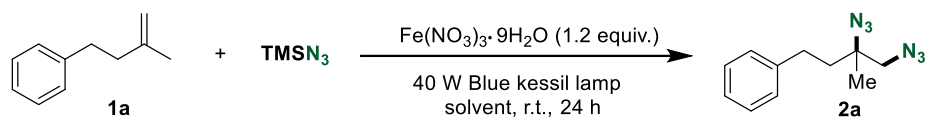

| entry | Solvent (0.10 M)                     | yield(%) <sup>b</sup> |
|-------|--------------------------------------|-----------------------|
| 1     | Et <sub>2</sub> O                    | 0                     |
| 2     | THF                                  | 0                     |
| 3     | CH <sub>2</sub> Cl <sub>2</sub>      | 0                     |
| 4     | ClCH <sub>2</sub> CH <sub>2</sub> Cl | 0                     |
| 5     | EtOAc                                | 67                    |
| 7     | Dioxane                              | 0                     |
| 8     | CH <sub>3</sub> CN                   | 85                    |

[a] Reaction conditions: **1a** (0.20 mmol, 1.0 equiv), TMSN<sub>3</sub> (1.0 mmol, 5.0 equiv), Fe(NO<sub>3</sub>)<sub>3</sub>·9H<sub>2</sub>O (0.24 mmol, 1.2 equiv) and solvent (2 mL), blue LEDs, 24 h. [b] Yields were determined by analysis of the crude <sup>1</sup>H NMR spectra using CH<sub>2</sub>Br<sub>2</sub> as an internal standard.

---

### Supplementary Table 6. Azido sources screening

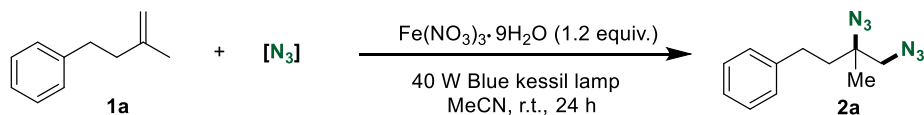

| entry | azido sources                                  | yield(%) <sup>b</sup> |
|-------|------------------------------------------------|-----------------------|
| 1     | TsN <sub>3</sub>                               | 0                     |
| 2     | CF <sub>3</sub> SO <sub>2</sub> N <sub>3</sub> | 0                     |

[a] Reaction conditions: **1a** (0.20 mmol, 1.0 equiv), [N<sub>3</sub>] (1.0 mmol, 5.0 equiv), Fe(NO<sub>3</sub>)<sub>3</sub>·9H<sub>2</sub>O (0.24 mmol, 1.2 equiv) and solvent (2 mL), blue LEDs, 24 h. [b] Yields were determined by analysis of the crude <sup>1</sup>H NMR spectra using CH<sub>2</sub>Br<sub>2</sub> as an internal standard.

### Supplementary Table 7. Amount screening

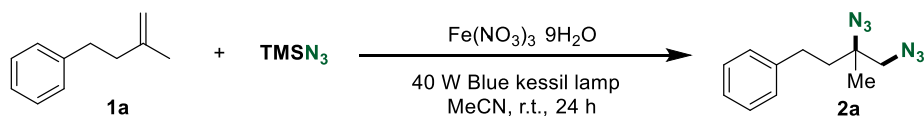

| entry | Variation of standard conditions                                         | yield(%) <sup>b</sup> |
|-------|--------------------------------------------------------------------------|-----------------------|
| 1     | 0.5 equiv. Fe(NO <sub>3</sub> ) <sub>3</sub> ·9H <sub>2</sub> O was used | 52                    |
| 2     | 4.0 equiv. TMSN <sub>3</sub> was used                                    | 76                    |
| 3     | 3.0 equiv. TMSN <sub>3</sub> was used                                    | 58                    |
| 4     | 1 mL CH <sub>3</sub> CN was used                                         | 76                    |
| 5     | 4 mL CH <sub>3</sub> CN was used                                         | 81                    |

[a] Reaction conditions: **1a** (0.20 mmol, 1.0 equiv), TMSN<sub>3</sub> (1.0 mmol, 5.0 equiv), Fe(NO<sub>3</sub>)<sub>3</sub>·9H<sub>2</sub>O (0.24 mmol, 1.2 equiv) and CH<sub>3</sub>CN (2 mL), blue LEDs, 24 h. [b] Yields were determined by analysis of the crude <sup>1</sup>H NMR spectra using CH<sub>2</sub>Br<sub>2</sub> as an internal standard.

### Supplementary Table 8. Control experiments

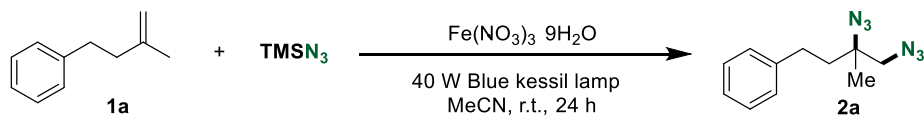

| entry | deviation from standard conditions | yield(%) <sup>b</sup> |
|-------|------------------------------------|-----------------------|
| 1     | none                               | 85(80) <sup>c</sup>   |
| 2     | no Fe                              | 0                     |
| 3     | no light                           | 0                     |

[a] Reaction conditions: **1a** (0.20 mmol, 1.0 equiv),  $\text{TMSN}_3$  (1.0 mmol, 5.0 equiv),  $\text{Fe}(\text{NO}_3)_3 \cdot 9\text{H}_2\text{O}$  (0.24 mmol, 1.2 equiv) and solvent (2 mL), blue LEDs, 24 h. [b] Yields were determined by analysis of the crude  $^1\text{H}$  NMR spectra using  $\text{CH}_2\text{Br}_2$  as an internal standard. [c] Isolated yield.

### 2.2 General procedure for alkene diazidation reaction

A 10 mL Schlenk tube equipped with a magnetic stir bar was charged with  $\text{Fe}(\text{NO}_3)_3 \cdot 9\text{H}_2\text{O}$  (0.24 mmol, 100 mg). Then, the tube was evacuated and backfilled with Ar (three times). Alkenes (0.20 mmol, 1.0 equiv.) and  $\text{TMSN}_3$  (1.0 mmol) in  $\text{CH}_3\text{CN}$  (2 mL) were added by syringe under Ar atmosphere. The reaction tube was then sealed and was placed at a distance (app. 5 cm) from a 40 W blue kessil lamp (Figure S1). The reaction mixture was stirred for 24-36 h at room temperature. After the reaction, the resulting solution was filtered through a cotton plug and washed with EtOAc. The filtrate was removed under reduced pressure and the residue was purified by silica gel column chromatography (ethyl acetate/*n*-pentane) to afford the desired diazides.

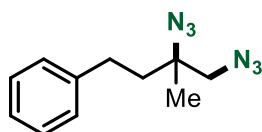

(3,4-diazido-3-methylbutyl)benzene



The reaction was carried out according to **the general alkene diazidation procedure** on 0.20-mmol scale (24 h). The residue was purified by flash column chromatography (ethyl acetate/*n*-pentane) to afford the diazide product **(3,4-diazido-3-methylbutyl)benzene (2a)** (36.8 mg, 80% yield) as an oil.  $^1\text{H NMR}$  (500 MHz, Chloroform-*d*)  $\delta$  7.32 – 7.28 (m, 2H), 7.24 – 7.18 (m, 3H), 3.39 – 3.28 (m, 2H), 2.68 (t,  $J = 8.2$  Hz, 2H), 1.92 – 1.81 (m, 2H), 1.39 (s, 3H).  $^{13}\text{C NMR}$  (101 MHz, Chloroform-*d*)  $\delta$  141.05, 128.57, 128.26, 126.19, 63.54, 59.09, 39.41, 30.16, 21.30. **HRMS** for  $\text{C}_{11}\text{H}_{15}\text{N}_6^+-\text{N}_2$  (ESI)  $[\text{M}]^+$ : calc.: 203.1291, found: 203.1294.

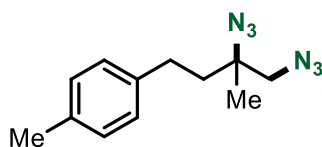

1-(3,4-diazido-3-methylbutyl)-4-methylbenzene

The reaction was carried out according to **the general alkene diazidation procedure** on 0.20-mmol scale (24 h). The residue was purified by flash column chromatography (ethyl acetate/*n*-pentane) to afford the diazide product **1-(3,4-diazido-3-methylbutyl)-4-methylbenzene (2b)** (40.6 mg, 83% yield) as an oil.  $^1\text{H NMR}$  (500 MHz, Chloroform-*d*)  $\delta$  7.12 (d,  $J = 7.9$  Hz, 2H), 7.09 (d,  $J = 8.2$  Hz, 2H), 3.36 – 3.28 (m, 2H), 2.68 – 2.62 (m, 2H), 2.33 (s, 3H), 1.92 – 1.78 (m, 2H), 1.38 (s, 3H).  $^{13}\text{C NMR}$  (101 MHz, Chloroform-*d*)  $\delta$  137.95, 135.70, 129.24, 128.12, 63.56, 59.09, 39.55, 29.70, 21.28, 20.96.

**HRMS** for  $\text{C}_{12}\text{H}_{17}\text{N}_6^+-\text{N}_2$  (ESI)  $[\text{M}]^+$ : calc.: 217.1448, found: 217.1449.

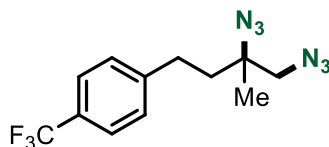

1-(3,4-diazido-3-methylbutyl)-4-(trifluoromethyl)benzene

The reaction was carried out according to **the general alkene diazidation procedure** on 0.20-mmol scale (24 h). The residue was purified by flash column chromatography (ethyl acetate/*n*-pentane) to afford the diazide product **1-(3,4-diazido-3-**

**methylbutyl)-4-(trifluoromethyl)benzene (2c)** (42.9 mg, 72% yield) as an oil.  $^1\text{H}$  NMR (500 MHz, Chloroform-*d*)  $\delta$  7.56 (d,  $J = 8.0$  Hz, 2H), 7.31 (d,  $J = 7.9$  Hz, 2H), 3.35 (s, 2H), 2.74 (ddd,  $J = 9.7, 6.9, 2.1$  Hz, 2H), 1.92 – 1.78 (m, 2H), 1.40 (s, 3H).  $^{13}\text{C}$  NMR (101 MHz, Chloroform-*d*)  $\delta$  145.18, 128.67 (q,  $J = 32.4$  Hz), 128.62, 125.51 (q,  $J = 3.9$  Hz), 124.16 (q,  $J = 272.0$  Hz), 63.36, 59.05, 39.08, 30.02, 21.29.  $^{19}\text{F}$  NMR (471 MHz, Chloroform-*d*)  $\delta$  -62.41. HRMS for  $\text{C}_{12}\text{H}_{14}\text{F}_3\text{N}_6^+-\text{N}_2$  (ESI)  $[\text{M}]^+$ : calc.: 271.1165, found: 271.1166.

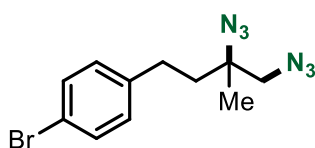

1-bromo-4-(3,4-diazido-3-methylbutyl)benzene

The reaction was carried out according to **the general alkene diazidation procedure** on 0.20-mmol scale (24 h). The residue was purified by flash column chromatography (ethyl acetate/*n*-pentane) to afford the diazide product **1-bromo-4-(3,4-diazido-3-methylbutyl)benzene (2d)** (50.1 mg, 81% yield) as an oil.  $^1\text{H}$  NMR (500 MHz, Chloroform-*d*)  $\delta$  7.42 (d,  $J = 8.4$  Hz, 2H), 7.07 (d,  $J = 8.4$  Hz, 2H), 3.32 (d,  $J = 1.4$  Hz, 2H), 2.63 (t,  $J = 8.7$  Hz, 2H), 1.93 – 1.72 (m, 2H), 1.38 (s, 3H).  $^{13}\text{C}$  NMR (101 MHz, Chloroform-*d*)  $\delta$  140.01, 131.64, 130.02, 119.97, 63.40, 59.06, 39.22, 29.59, 21.30. HRMS for  $\text{C}_{11}\text{H}_{14}\text{BrN}_6^+-\text{N}_2$  (ESI)  $[\text{M}]^+$ : calc.: 281.0396, found: 281.0396.

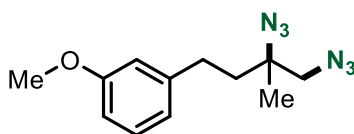

1-(3,4-diazido-3-methylbutyl)-3-methoxybenzene

The reaction was carried out according to **the general alkene diazidation procedure** on 0.20-mmol scale (24 h). The residue was purified by flash column chromatography (ethyl acetate/*n*-pentane) to afford the diazide product **1-(3,4-diazido-3-methylbutyl)-3-methoxybenzene (2e)** (38.5 mg, 74% yield) as an oil.  $^1\text{H}$  NMR (500 MHz, Chloroform-*d*)  $\delta$  7.22 (t,  $J = 7.8$  Hz, 1H), 6.81 – 6.73 (m, 3H), 3.81 (s, 3H),

3.37 – 3.28 (m, 2H), 2.65 (ddd,  $J = 9.5, 7.8, 1.9$  Hz, 2H), 1.92 – 1.78 (m, 2H), 1.38 (s, 3H).  $^{13}\text{C}$  NMR (101 MHz, Chloroform- $d$ )  $\delta$  159.81, 142.68, 129.56, 120.63, 114.12, 111.47, 63.53, 59.09, 55.17, 39.31, 30.21, 21.29.

HRMS for  $\text{C}_{12}\text{H}_{17}\text{N}_6\text{O}^+-\text{N}_2$  (ESI)  $[\text{M}]^+$ : calc.: 233.1397, found: 233.1393.

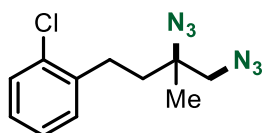

1-chloro-2-(3,4-diazido-3-methylbutyl)benzene

The reaction was carried out according to **the general alkene diazidation procedure** on 0.20-mmol scale (24 h). The residue was purified by flash column chromatography (ethyl acetate/ $n$ -pentane) to afford the diazide product **1-chloro-2-(3,4-diazido-3-methylbutyl)benzene (2f)** (33.9 mg, 64% yield) as an oil.  $^1\text{H}$  NMR (500 MHz, Chloroform- $d$ )  $\delta$  7.35 (d,  $J = 7.5$  Hz, 1H), 7.25 – 7.14 (m, 3H), 3.40 – 3.31 (m, 2H), 2.87 – 2.74 (m, 2H), 1.89 – 1.79 (m, 2H), 1.41 (s, 3H).  $^{13}\text{C}$  NMR (101 MHz, Chloroform- $d$ )  $\delta$  138.66, 133.78, 130.35, 129.63, 127.78, 127.07, 63.49, 59.05, 37.58, 28.17, 21.15.

HRMS for  $\text{C}_{11}\text{H}_{14}\text{ClN}_6^+-\text{N}_2$  (ESI)  $[\text{M}]^+$ : calc.: 237.0902, found: 237.0906.

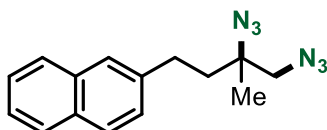

2-(3,4-diazido-3-methylbutyl)naphthalene

The reaction was carried out according to **the general alkene diazidation procedure** on 0.20-mmol scale (36 h). The residue was purified by flash column chromatography (ethyl acetate/ $n$ -pentane) to afford the diazide product **2-(3,4-diazido-3-methylbutyl)naphthalene (2g)** (45.4 mg, 81% yield) as an oil.  $^1\text{H}$  NMR (500 MHz, Chloroform- $d$ )  $\delta$  7.84 – 7.77 (m, 3H), 7.64 (s, 1H), 7.49 – 7.40 (m, 2H), 7.33 (d,  $J = 9.6$  Hz, 1H), 3.40 – 3.32 (m, 2H), 2.85 (t,  $J = 8.7$  Hz, 2H), 2.00 – 1.88 (m, 2H), 1.42 (s, 3H).  $^{13}\text{C}$  NMR (101 MHz, Chloroform- $d$ )  $\delta$  138.51, 133.63, 132.10, 128.21, 127.63, 127.39, 126.95, 126.36, 126.09, 125.39, 63.59, 59.13, 39.32, 30.33, 21.34.

HRMS for  $\text{C}_{15}\text{H}_{17}\text{N}_6^+-\text{N}_2$  (ESI)  $[\text{M}]^+$ : calc.: 253.1448, found: 253.1449.

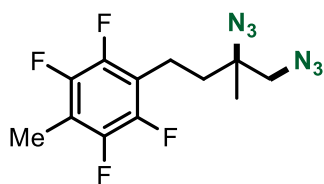

1-(3,4-diazido-3-methylbutyl)-2,3,5,6-tetrafluoro-4-methylbenzene

The reaction was carried out according to **the general alkene diazidation procedure** on 0.20-mmol scale (24 h). The residue was purified by flash column chromatography (ethyl acetate/*n*-pentane) to afford the diazide product **1-(3,4-diazido-3-methylbutyl)-2,3,5,6-tetrafluoro-4-methylbenzene (2h)** (48.0 mg, 76% yield) as an oil.  $^1\text{H NMR}$  (500 MHz, Chloroform-*d*)  $\delta$  3.39 – 3.32 (m, 2H), 2.77 (ddd,  $J = 9.2, 7.4, 1.5$  Hz, 2H), 2.24 (t,  $J = 2.1$  Hz, 3H), 1.84 – 1.75 (m, 2H), 1.40 (s, 3H).  $^{13}\text{C NMR}$  (101 MHz, Chloroform-*d*)  $\delta$  146.33 – 145.51 (m), 143.95 – 143.01 (m), 116.24 (t,  $J = 18.3$  Hz), 114.08 (t,  $J = 19.1$  Hz), 63.13, 58.99, 36.68, 31.24, 20.96, 17.24.  $^{19}\text{F NMR}$  (471 MHz, Chloroform-*d*)  $\delta$  -144.04 – -144.93 (m), -146.63 (dd,  $J = 22.9, 13.5$  Hz).

**HRMS** for  $\text{C}_{12}\text{H}_{13}\text{F}_4\text{N}_6^+-\text{N}_2$  (ESI)  $[\text{M}]^+$ : calc.: 289.1071, found: 289.1075.

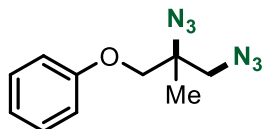

(2,3-diazido-2-methylpropoxy)benzene

The reaction was carried out according to **the general alkene diazidation procedure** on 0.20-mmol scale (24 h). The residue was purified by flash column chromatography (ethyl acetate/*n*-pentane) to afford the diazide product **(2,3-diazido-2-methylpropoxy)benzene (2i)** (35.3 mg, 81% yield) as an oil.  $^1\text{H NMR}$  (500 MHz, Chloroform-*d*)  $\delta$  7.31 (dd,  $J = 8.6, 7.4$  Hz, 2H), 7.00 (t,  $J = 7.4$  Hz, 1H), 6.93 (d,  $J = 8.7$  Hz, 2H), 3.99 – 3.93 (m, 2H), 3.54 – 3.46 (m, 2H), 1.46 (s, 3H).  $^{13}\text{C NMR}$  (101 MHz, Chloroform-*d*)  $\delta$  158.07, 129.57, 121.61, 114.62, 71.33, 62.85, 56.26, 19.25.

**HRMS** for  $\text{C}_{10}\text{H}_{13}\text{N}_6\text{O}^+-\text{N}_2$  (ESI)  $[\text{M}]^+$ : calc.: 205.1084, found: 205.1086.

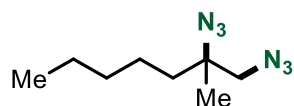

1,2-diazido-2-methylheptane

The reaction was carried out according to **the general alkene diazidation procedure** on 0.20-mmol scale (24 h). The residue was purified by flash column chromatography (ethyl acetate/*n*-pentane) to afford the diazide product **1,2-diazido-2-methylheptane (2j)** (29.4 mg, 75% yield) as an oil. **<sup>1</sup>H NMR** (500 MHz, Chloroform-*d*) δ 3.29 – 3.21 (m, 2H), 1.57 – 1.52 (m, 2H), 1.38 – 1.25 (m, 9H), 0.90 (t, *J* = 6.9 Hz, 3H). **<sup>13</sup>C NMR** (101 MHz, Chloroform-*d*) δ 63.82, 59.11, 37.33, 31.97, 23.33, 22.46, 21.22, 13.92. **HRMS** for C<sub>8</sub>H<sub>17</sub>N<sub>6</sub><sup>+</sup>-N<sub>2</sub> (ESI) [M]<sup>+</sup>: calc.: 169,1448, found: 169,1449.

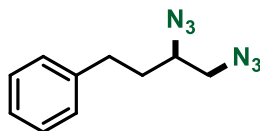

3,4-diazidobutyl)benzene

The reaction was carried out according to **the general alkene diazidation procedure** on 0.20-mmol scale (24 h). The residue was purified by flash column chromatography (ethyl acetate/*n*-pentane) to afford the diazide product **3,4-diazidobutyl)benzene (2k)** (31.5 mg, 73% yield) as an oil. **<sup>1</sup>H NMR** (500 MHz, Chloroform-*d*) δ 7.31 (t, *J* = 7.5 Hz, 2H), 7.21 (dd, *J* = 18.8, 7.2 Hz, 3H), 3.48 – 3.33 (m, 3H), 2.85 – 2.78 (m, 1H), 2.75 – 2.67 (m, 1H), 1.91 – 1.80 (m, 2H). **<sup>13</sup>C NMR** (101 MHz, Chloroform-*d*) δ 140.35, 128.65, 128.37, 126.34, 61.13, 54.94, 33.40, 32.01. **HRMS** for C<sub>10</sub>H<sub>13</sub>N<sub>6</sub><sup>+</sup>-N<sub>2</sub> (ESI) [M]<sup>+</sup>: calc.: 189.1135, found: 189.1138.

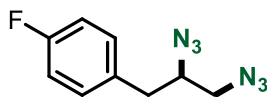

1-(2,3-diazidopropyl)-4-fluorobenzene

The reaction was carried out according to **the general alkene diazidation procedure** on 0.20-mmol scale (24 h). The residue was purified by flash column chromatography (ethyl acetate/*n*-pentane) to afford the diazide product **1-(2,3-diazidopropyl)-4-fluorobenzene (2l)** (37.8 mg, 86% yield) as an oil. **<sup>1</sup>H NMR** (500 MHz, Chloroform-

*d*)  $\delta$  7.19 (dd,  $J = 8.7, 5.3$  Hz, 2H), 7.03 (t,  $J = 8.7$  Hz, 2H), 3.71 – 3.65 (m, 1H), 3.40 (dd,  $J = 12.7, 4.2$  Hz, 1H), 3.30 (dd,  $J = 12.7, 6.8$  Hz, 1H), 2.90 – 2.79 (m, 2H).  $^{13}\text{C}$  NMR (101 MHz, Chloroform-*d*)  $\delta$  162.01 (d,  $J = 245.8$  Hz), 132.02 (d,  $J = 3.7$  Hz), 130.76 (d,  $J = 7.6$  Hz), 115.67 (d,  $J = 21.6$  Hz), 62.88, 53.85, 37.19.  $^{19}\text{F}$  NMR (471 MHz, Chloroform-*d*)  $\delta$  -115.41.

HRMS for  $\text{C}_9\text{H}_{10}\text{FN}_6^+-\text{N}_2$  (ESI)  $[\text{M}]^+$ : calc.: 193.0884, found: 193.0886.

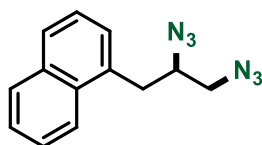

1-(2,3-diazidopropyl)naphthalene

The reaction was carried out according to **the general alkene diazidation procedure** on 0.20-mmol scale (24 h). The residue was purified by flash column chromatography (ethyl acetate/*n*-pentane) to afford the diazide product **1-(2,3-diazidopropyl)naphthalene (2m)** (40.8 mg, 81% yield) as an oil.  $^1\text{H}$  NMR (500 MHz, Chloroform-*d*)  $\delta$  7.99 (d,  $J = 8.4$  Hz, 1H), 7.90 (d,  $J = 8.0$  Hz, 1H), 7.81 (d,  $J = 8.1$  Hz, 1H), 7.60 – 7.50 (m, 2H), 7.46 – 7.38 (m, 2H), 3.91 (qd,  $J = 7.0, 4.1$  Hz, 1H), 3.44 (dd,  $J = 12.7, 4.1$  Hz, 1H), 3.40 – 3.32 (m, 3H).  $^{13}\text{C}$  NMR (101 MHz, Chloroform-*d*)  $\delta$  134.01, 132.39, 131.70, 129.11, 128.12, 127.96, 126.48, 125.85, 125.50, 123.02, 61.97, 54.13, 35.13.

HRMS for  $\text{C}_{13}\text{H}_{13}\text{N}_6^+-\text{N}_2$  (ESI)  $[\text{M}]^+$ : calc.: 225.1135, found: 225.1138.

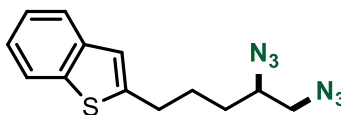

2-(4,5-diazidopentyl)benzo[*b*]thiophene

The reaction was carried out according to **the general alkene diazidation procedure** on 0.20-mmol scale (24 h). The residue was purified by flash column chromatography (ethyl acetate/*n*-pentane) to afford the diazide product **2-(4,5-diazidopentyl)benzo[*b*]thiophene (2n)** (37.2 mg, 65% yield) as an oil.  $^1\text{H}$  NMR (500 MHz, Chloroform-*d*)  $\delta$  7.77 (d,  $J = 8.3$  Hz, 1H), 7.68 (d,  $J = 7.7$  Hz, 1H), 7.34 –

7.30 (m, 1H), 7.29 – 7.25 (m, 1H), 7.02 (s, 1H), 3.50 (dt,  $J = 12.5, 5.5$  Hz, 1H), 3.39 (dd,  $J = 12.7, 4.1$  Hz, 1H), 3.33 (dd,  $J = 12.7, 7.3$  Hz, 1H), 2.96 (t,  $J = 7.7$  Hz, 2H), 1.98 – 1.90 (m, 1H), 1.88 – 1.78 (m, 1H), 1.67 – 1.59 (m, 2H).  $^{13}\text{C}$  NMR (101 MHz, Chloroform-*d*)  $\delta$  145.06, 140.06, 139.30, 124.19, 123.63, 122.80, 122.15, 121.01, 61.82, 54.84, 31.11, 30.32, 27.29.

**HRMS** for  $\text{C}_{13}\text{H}_{15}\text{N}_6\text{S}^+-\text{N}_2$  (ESI)  $[\text{M}]^+$ : calc.: 259.1012, found: 259.1013.

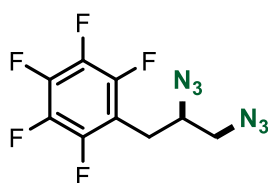

1-(2,3-diazidopropyl)-2,3,4,5,6-pentafluorobenzene

The reaction was carried out according to **the general alkene diazidation procedure** on 0.20-mmol scale (24 h). The residue was purified by flash column chromatography (ethyl acetate/*n*-pentane) to afford the diazide product **1-(2,3-diazidopropyl)-2,3,4,5,6-pentafluorobenzene (2o)** (42.6 mg, 73% yield) as an oil.  $^1\text{H}$  NMR (500 MHz, Chloroform-*d*)  $\delta$  3.80 – 3.74 (m, 1H), 3.49 (dd,  $J = 12.8, 4.4$  Hz, 1H), 3.43 (dd,  $J = 12.8, 7.0$  Hz, 1H), 2.94 (dt,  $J = 7.0, 1.7$  Hz, 2H).  $^{13}\text{C}$  NMR (101 MHz, Chloroform-*d*)  $\delta$  149.33 – 140.82 (m), 140.13 – 137.24 (m), 110.23 – 109.79 (m), 60.61, 54.23, 25.17.  $^{19}\text{F}$  NMR (471 MHz, Chloroform-*d*)  $\delta$  -142.20 (dd,  $J = 23.6, 10.1$  Hz), -154.68 (t,  $J = 21.2$  Hz), -158.60 – -170.67 (m).

**HRMS** for  $\text{C}_9\text{H}_6\text{F}_5\text{N}_6^+-\text{N}_2$  (ESI)  $[\text{M}]^+$ : calc.: 265.0507, found: 265.0509.

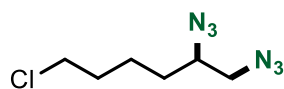

1,2-diazido-6-chlorohexane

The reaction was carried out according to **the general alkene diazidation procedure** on 0.20-mmol scale (24 h). The residue was purified by flash column chromatography (ethyl acetate/*n*-pentane) to afford the diazide product **1,2-diazido-6-chlorohexane (2p)** (33.9 mg, 84% yield) as an oil.  $^1\text{H}$  NMR (500 MHz, Chloroform-*d*)  $\delta$  3.55 (t,  $J = 6.5$  Hz, 2H), 3.48 (ddd,  $J = 8.5, 3.9, 2.0$  Hz, 1H), 3.43 – 3.39 (m, 1H), 3.34 (dd,  $J =$

12.6, 7.2 Hz, 1H), 1.85 – 1.78 (m, 2H), 1.65 – 1.49 (m, 4H).  $^{13}\text{C}$  NMR (101 MHz, Chloroform-*d*)  $\delta$  61.82, 54.76, 44.45, 32.10, 31.07, 23.26.

**HRMS** for  $\text{C}_6\text{H}_{12}\text{ClN}_6^+-\text{N}_2$  (ESI)  $[\text{M}]^+$ : calc.: 175.0745, found: 175.0749.

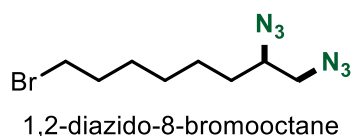

The reaction was carried out according to **the general alkene diazidation procedure** on 0.20-mmol scale (24 h). The residue was purified by flash column chromatography (ethyl acetate/*n*-pentane) to afford the diazide product **1,2-diazido-8-bromooctane (2q)** (47.9 mg, 87% yield) as an oil.  $^1\text{H}$  NMR (500 MHz, Chloroform-*d*)  $\delta$  3.49 – 3.43 (m, 1H), 3.43 – 3.37 (m, 3H), 3.32 (dd,  $J = 12.6, 7.3$  Hz, 1H), 1.90 – 1.83 (m, 2H), 1.58 – 1.52 (m, 2H), 1.51 – 1.33 (m, 6H).  $^{13}\text{C}$  NMR (101 MHz, Chloroform-*d*)  $\delta$  61.96, 54.82, 33.68, 31.66, 28.43, 27.90, 25.71.

**HRMS** for  $\text{C}_8\text{H}_{16}\text{BrN}_6^+-\text{N}_2$  (ESI)  $[\text{M}]^+$ : calc.: 247.0553, found: 247.0555.

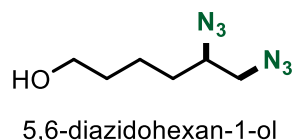

The reaction was carried out according to **the general alkene diazidation procedure** on 0.20-mmol scale (24 h). The residue was purified by flash column chromatography (ethyl acetate/*n*-pentane) to afford the diazide product **5,6-diazidohexan-1-ol (2r)** (23.9 mg, 65% yield) as an oil.  $^1\text{H}$  NMR (400 MHz, Chloroform-*d*)  $\delta$  3.68 (t,  $J = 6.0$  Hz, 2H), 3.49 (d,  $J = 13.2$  Hz, 1H), 3.42 – 3.38 (m, 1H), 3.36 – 3.31 (m, 1H), 2.04 (br s, 1H), 1.65 – 1.56 (m, 6H).  $^{13}\text{C}$  NMR (101 MHz, Chloroform-*d*)  $\delta$  62.51, 61.98, 54.80, 32.19, 31.56, 22.25.

**HRMS** for  $\text{C}_6\text{H}_{13}\text{N}_6\text{O}^+-\text{N}_2$  (ESI)  $[\text{M}]^+$ : calc.: 157.1084, found: 157.1084.

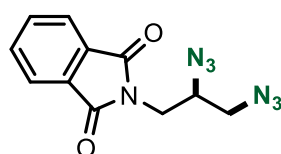



The reaction was carried out according to **the general alkene diazidation procedure** on 0.20-mmol scale (36 h). The residue was purified by flash column chromatography (ethyl acetate/*n*-pentane) to afford the diazide product **2-(2,3-diazidopropyl)isoindoline-1,3-dione (2s)** (38.5 mg, 76% yield) as an oil.  $^1\text{H NMR}$  (500 MHz, Chloroform-*d*)  $\delta$  7.89 (dd,  $J = 5.5, 3.1$  Hz, 2H), 7.76 (dd,  $J = 5.5, 3.1$  Hz, 2H), 3.98 – 3.92 (m, 1H), 3.88 (dd,  $J = 14.0, 7.4$  Hz, 1H), 3.77 (dd,  $J = 13.9, 5.5$  Hz, 1H), 3.54 (dd,  $J = 12.9, 4.2$  Hz, 1H), 3.44 (dd,  $J = 12.9, 7.1$  Hz, 1H).  $^{13}\text{C NMR}$  (101 MHz, Chloroform-*d*)  $\delta$  167.94, 134.37, 131.72, 123.64, 59.61, 52.94, 38.90. **HRMS** for  $\text{C}_{11}\text{H}_{10}\text{N}_7\text{O}_2^+-\text{N}_2$  (ESI)  $[\text{M}]^+$ : calc.: 244.0829, found: 244.0829.

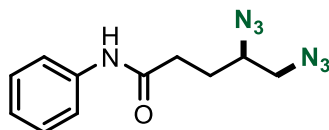

4,5-diazido-*N*-phenylpentanamide

The reaction was carried out according to **the general alkene diazidation procedure** on 0.20-mmol scale (36 h). The residue was purified by flash column chromatography (ethyl acetate/*n*-pentane) to afford the diazide product **4,5-diazido-*N*-phenylpentanamide (2t)** (38.3 mg, 74% yield) as an oil.  $^1\text{H NMR}$  (400 MHz, Chloroform-*d*)  $\delta$  7.54 – 7.45 (m, 2H), 7.36 – 7.28 (m, 3H), 7.18 – 7.06 (m, 1H), 3.67 – 3.60 (m, 1H), 3.49 (dd,  $J = 12.8, 4.0$  Hz, 1H), 3.38 (dd,  $J = 12.7, 7.3$  Hz, 1H), 2.52 (ddt,  $J = 17.7, 15.5, 7.4$  Hz, 2H), 2.04 (dtd,  $J = 15.0, 7.6, 4.0$  Hz, 1H), 1.88 – 1.74 (m, 1H).  $^{13}\text{C NMR}$  (126 MHz, Chloroform-*d*)  $\delta$  169.60, 137.51, 129.05, 124.55, 119.89, 61.13, 54.97, 33.17, 27.28.

**HRMS** for  $\text{C}_{11}\text{H}_{14}\text{N}_7\text{O}^+-\text{N}_2$  (ESI)  $[\text{M}]^+$ : calc.: 232.1193, found: 232.1198.

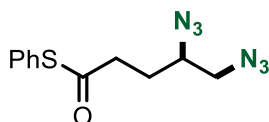

*S*-phenyl-4,5-diazidopentanethioate

The reaction was carried out according to **the general alkene diazidation procedure** on 0.20-mmol scale (36 h). The residue was purified by flash column chromatography (ethyl acetate/*n*-pentane) to afford the diazide product ***S*-phenyl-4,5-**

**diazidopentanethioate (2u)** (47.5 mg, 86% yield) as an oil.  $^1\text{H NMR}$  (500 MHz, Chloroform-*d*)  $\delta$  7.42 (d,  $J = 1.3$  Hz, 5H), 3.64 – 3.57 (m, 1H), 3.45 (dd,  $J = 12.8, 4.2$  Hz, 1H), 3.36 (dd,  $J = 12.7, 7.2$  Hz, 1H), 2.83 (t,  $J = 7.1$  Hz, 2H), 2.02 – 1.93 (m, 1H), 1.85 – 1.76 (m, 1H).  $^{13}\text{C NMR}$  (101 MHz, Chloroform-*d*)  $\delta$  196.46, 134.46, 129.60, 129.28, 127.22, 60.86, 54.85, 39.37, 27.34.

**HRMS** for  $\text{C}_{11}\text{H}_{13}\text{N}_6\text{OS}^+-\text{N}_2$  (ESI)  $[\text{M}]^+$ : calc.: 249.0805, found: 249.0809.

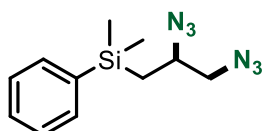

(2,3-diazidopropyl)dimethyl(phenyl)silane

The reaction was carried out according to **the general alkene diazidation procedure** on 0.20-mmol scale (24 h). The residue was purified by flash column chromatography (ethyl acetate/*n*-pentane) to afford the diazide product **(2,3-diazidopropyl)dimethyl(phenyl)silane (2v)** (36.9 mg, 71% yield) as an oil.  $^1\text{H NMR}$  (400 MHz, Chloroform-*d*)  $\delta$  7.54 – 7.49 (m, 2H), 7.41 – 7.36 (m, 3H), 3.51 – 3.43 (m, 1H), 3.29 (dd,  $J = 12.6, 3.8$  Hz, 1H), 3.21 (dd,  $J = 12.6, 7.3$  Hz, 1H), 1.20 – 0.99 (m, 2H), 0.40 (s, 3H), 0.38 (s, 3H).  $^{13}\text{C NMR}$  (126 MHz, Chloroform-*d*)  $\delta$  137.37, 133.44, 129.46, 128.08, 59.54, 57.03, 19.16, -2.35, -2.87.

**HRMS** for  $\text{C}_{11}\text{H}_{17}\text{N}_6\text{Si}^+-\text{N}_2$  (ESI)  $[\text{M}]^+$ : calc.: 233.1217, found: 233.1219.

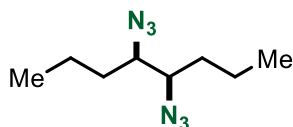

4,5-diazidooctane

The reaction was carried out according to **the general alkene diazidation procedure** on 0.20-mmol scale (24 h). The residue was purified by flash column chromatography (ethyl acetate/*n*-pentane) to afford the diazide product **4,5-diazidooctane (2w)** (28.6 mg, 72% yield, d.r. = 1.1:1) as an oil.  $^1\text{H NMR}$  (500 MHz, Chloroform-*d*)  $\delta$  3.37 – 3.32 (m, 1H), 3.30 – 3.25 (m, 1H), 1.69 – 1.50 (m, 6H), 1.46 – 1.37 (m, 2H), 1.02 – 0.94 (m, 6H).  $^{13}\text{C NMR}$  (101 MHz, Chloroform-*d*)  $\delta$  65.63, 65.03, 33.36, 32.45,

19.59, 19.47, 13.79.

**HRMS** for  $C_8H_{17}N_6^+-N_2$  (ESI)  $[M]^+$ : calc.: 169.1448, found: 169.1445.

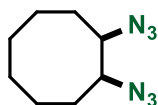

1,2-diazidocyclooctane

The reaction was carried out according to **the general alkene diazidation procedure** on 0.20-mmol scale (24 h). The residue was purified by flash column chromatography (ethyl acetate/*n*-pentane) to afford the diazide product **1,2-diazidocyclooctane (2x)** (32.6 mg, 84% yield, d.r. = 4.4:1) as an oil.  $^1H$  NMR (500 MHz, Chloroform-*d*)  $\delta$  3.75 (dd,  $J = 8.1, 3.8$  Hz, 0.37H), 3.50 (dd,  $J = 4.8, 2.2$  Hz, 1.63H), 1.98 – 1.90 (m, 2H), 1.84 – 1.70 (m, 4H), 1.69 – 1.62 (m, 2H), 1.61 – 1.50 (m, 2H), 1.48 – 1.38 (m, 2H).  $^{13}C$  NMR (101 MHz, Chloroform-*d*)  $\delta$  66.57, 63.43, 29.27, 28.14, 26.45, 25.59, 24.72, 23.47.

**HRMS** for  $C_8H_{15}N_6^+-N_2$  (ESI)  $[M]^+$ : calc.: 167.1291, found: 167.1292.

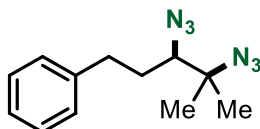

(3,4-diazido-4-methylpentyl)benzene

The reaction was carried out according to **the general alkene diazidation procedure** on 0.20-mmol scale (24 h). The residue was purified by flash column chromatography (ethyl acetate/*n*-pentane) to afford the diazide product **(3,4-diazido-4-methylpentyl)benzene (2y)** (50.0 mg, 84% yield) as an oil.  $^1H$  NMR (500 MHz, Chloroform-*d*)  $\delta$  7.33 (d,  $J = 7.8$  Hz, 2H), 7.24 – 7.19 (m, 3H), 3.07 (dd,  $J = 11.2, 2.3$  Hz, 1H), 2.94 (ddd,  $J = 13.8, 9.3, 4.7$  Hz, 1H), 2.67 (ddd,  $J = 13.8, 8.9, 7.8$  Hz, 1H), 1.98 – 1.90 (m, 1H), 1.77 – 1.70 (m, 1H), 1.31 (s, 3H), 1.28 (s, 3H).  $^{13}C$  NMR (101 MHz, Chloroform-*d*)  $\delta$  140.63, 128.44, 126.27, 69.73, 64.57, 33.05, 31.30, 22.95, 22.83.

**HRMS** for  $C_{12}H_{17}N_6^+-N_2$  (ESI)  $[M]^+$ : calc.: 217.1448, found: 217.1445.

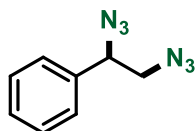

(1,2-diazidoethyl)benzene

The reaction was carried out according to **the general alkene diazidation procedure** on 0.20-mmol scale (24 h). The residue was purified by flash column chromatography (ethyl acetate/*n*-pentane) to afford the diazide product **(1,2-diazidoethyl)benzene (2z)** (26.3 mg, 70% yield) as an oil. **<sup>1</sup>H NMR** (500 MHz, Chloroform-*d*)  $\delta$  7.44 – 7.32 (m, 5H), 4.67 (dd, *J* = 8.3, 4.9 Hz, 1H), 3.51 (dd, *J* = 12.8, 8.3 Hz, 1H), 3.45 (dd, *J* = 12.7, 4.9 Hz, 1H). **<sup>13</sup>C NMR** (101 MHz, Chloroform-*d*)  $\delta$  136.32, 129.08, 129.04, 126.93, 65.52, 55.96.

**HRMS** for C<sub>8</sub>H<sub>9</sub>N<sub>6</sub><sup>+</sup>-N<sub>2</sub> (ESI) [M]<sup>+</sup>: calc.: 161.0822, found: 161.0822.

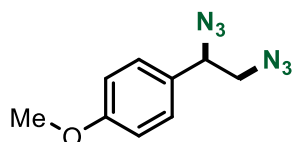

1-(1,2-diazidoethyl)-4-methoxybenzene

The reaction was carried out according to **the general alkene diazidation procedure** on 0.20-mmol scale (24 h). The residue was purified by flash column chromatography (ethyl acetate/*n*-pentane) to afford the diazide product **1-(1,2-diazidoethyl)-4-methoxybenzene (2a')** (28.3 mg, 65% yield) as an oil. **<sup>1</sup>H NMR** (500 MHz, Chloroform-*d*)  $\delta$  7.26 (d, *J* = 8.7 Hz, 2H), 6.93 (d, *J* = 8.7 Hz, 2H), 4.62 (dd, *J* = 8.3, 5.0 Hz, 1H), 3.82 (s, 3H), 3.49 (dd, *J* = 12.7, 8.3 Hz, 1H), 3.41 (dd, *J* = 12.7, 5.1 Hz, 1H). **<sup>13</sup>C NMR** (101 MHz, Chloroform-*d*)  $\delta$  128.27, 127.55, 114.45, 113.68, 65.04, 55.89, 55.33.

**HRMS** for C<sub>9</sub>H<sub>11</sub>N<sub>6</sub>O<sup>+</sup> (ESI) [M]<sup>+</sup>: calc.: 191.0927, found: 191.0927.

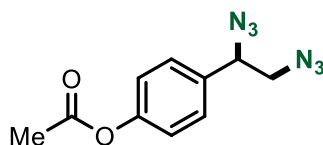

4-(1,2-diazidoethyl)phenyl acetate

The reaction was carried out according to **the general alkene diazidation procedure**

on 0.20-mmol scale (24 h). The residue was purified by flash column chromatography (ethyl acetate/*n*-pentane) to afford the diazide product **4-(1,2-diazidoethyl)phenyl acetate (2b')** (36.9 mg, 75% yield) as an oil.  $^1\text{H NMR}$  (500 MHz, Chloroform-*d*)  $\delta$  7.35 (d,  $J = 8.5$  Hz, 2H), 7.15 (d,  $J = 8.6$  Hz, 2H), 4.67 (dd,  $J = 8.4, 4.8$  Hz, 1H), 3.49 (dd,  $J = 12.8, 8.3$  Hz, 1H), 3.43 (dd,  $J = 12.8, 4.8$  Hz, 1H), 2.31 (s, 3H).  $^{13}\text{C NMR}$  (101 MHz, Chloroform-*d*)  $\delta$  169.18, 151.01, 133.92, 128.03, 122.25, 64.99, 56.03, 21.10.

**HRMS** for  $\text{C}_{10}\text{H}_{11}\text{N}_6\text{O}_2^+$  (ESI)  $[\text{M}]^+$ : calc.: 219.0877, found: 219.0872.

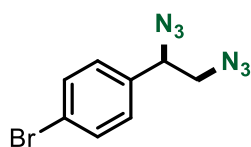

1-bromo-4-(1,2-diazidoethyl)benzene

The reaction was carried out according to **the general alkene diazidation procedure** on 0.20-mmol scale (24 h). The residue was purified by flash column chromatography (ethyl acetate/*n*-pentane) to afford the diazide product **1-bromo-4-(1,2-diazidoethyl)benzene (2c')** (37.9 mg, 71% yield) as an oil.  $^1\text{H NMR}$  (500 MHz, Chloroform-*d*)  $\delta$  7.55 (d,  $J = 8.4$  Hz, 2H), 7.22 (d,  $J = 8.4$  Hz, 2H), 4.63 (dd,  $J = 8.0, 5.0$  Hz, 1H), 3.48 (dd,  $J = 12.7, 8.0$  Hz, 1H), 3.43 (dd,  $J = 12.8, 5.0$  Hz, 1H).  $^{13}\text{C NMR}$  (101 MHz, Chloroform-*d*)  $\delta$  135.39, 132.25, 128.58, 123.08, 64.83, 55.80.

**HRMS** for  $\text{C}_8\text{H}_8\text{BrN}_6^+-\text{N}_2$  (ESI)  $[\text{M}]^+$ : calc.: 238.9927, found: 238.9923.

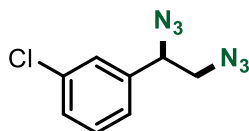

1-chloro-3-(1,2-diazidoethyl)benzene

The reaction was carried out according to **the general alkene diazidation procedure** on 0.20-mmol scale (24 h). The residue was purified by flash column chromatography (ethyl acetate/*n*-pentane) to afford the diazide product **1-chloro-3-(1,2-diazidoethyl)benzene (2d')** (30.6 mg, 69% yield) as an oil.  $^1\text{H NMR}$  (500 MHz, Chloroform-*d*)  $\delta$  7.37 – 7.33 (m, 3H), 7.24 – 7.21 (m, 1H), 4.64 (dd,  $J = 8.0, 5.0$  Hz,

1H), 3.49 (dd,  $J = 12.8, 8.0$  Hz, 1H), 3.44 (dd,  $J = 12.8, 5.0$  Hz, 1H).  $^{13}\text{C}$  NMR (101 MHz, Chloroform-*d*)  $\delta$  138.42, 135.04, 130.35, 129.21, 127.13, 125.07, 64.88, 55.89. HRMS for  $\text{C}_8\text{H}_8\text{ClN}_6^+-\text{N}_2$  (ESI)  $[\text{M}]^+$ : calc.: 195.0432, found: 195.0434.

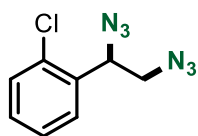

1-chloro-2-(1,2-diazidoethyl)benzene

The reaction was carried out according to **the general alkene diazidation procedure** on 0.20-mmol scale (24 h). The residue was purified by flash column chromatography (ethyl acetate/*n*-pentane) to afford the diazide product **1-chloro-2-(1,2-diazidoethyl)benzene (2e')** (25.8 mg, 58% yield) as an oil.  $^1\text{H}$  NMR (500 MHz, Chloroform-*d*)  $\delta$  7.50 (dd,  $J = 7.6, 1.8$  Hz, 1H), 7.42 (dd,  $J = 7.7, 1.5$  Hz, 1H), 7.38 – 7.29 (m, 2H), 5.22 (dd,  $J = 8.3, 3.8$  Hz, 1H), 3.55 (dd,  $J = 12.8, 3.8$  Hz, 1H), 3.41 (dd,  $J = 12.8, 8.3$  Hz, 1H).  $^{13}\text{C}$  NMR (101 MHz, Chloroform-*d*)  $\delta$  134.10, 132.64, 129.95, 128.08, 127.55, 62.10, 54.83.

HRMS for  $\text{C}_8\text{H}_8\text{ClN}_6^+-\text{N}_2$  (ESI)  $[\text{M}]^+$ : calc.: 195.0432, found: 195.0435.

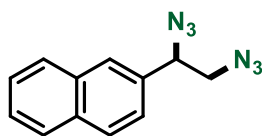

2-(1,2-diazidoethyl)naphthalene

The reaction was carried out according to **the general alkene diazidation procedure** on 0.20-mmol scale (24 h). The residue was purified by flash column chromatography (ethyl acetate/*n*-pentane) to afford the diazide product **2-(1,2-diazidoethyl)naphthalene (2f')** (33.3 mg, 70% yield) as an oil.  $^1\text{H}$  NMR (500 MHz, Chloroform-*d*)  $\delta$  7.92 – 7.85 (m, 3H), 7.82 (d,  $J = 1.7$  Hz, 1H), 7.57 – 7.52 (m, 2H), 7.43 (dd,  $J = 8.5, 1.9$  Hz, 1H), 4.84 (dd,  $J = 8.3, 4.9$  Hz, 1H), 3.61 (dd,  $J = 12.8, 8.3$  Hz, 1H), 3.53 (dd,  $J = 12.8, 4.9$  Hz, 1H).  $^{13}\text{C}$  NMR (101 MHz, Chloroform-*d*)  $\delta$  133.65, 133.42, 133.14, 129.13, 128.04, 127.78, 126.72, 126.55, 123.97, 65.72, 55.90. HRMS for  $\text{C}_{12}\text{H}_{11}\text{N}_6^+-\text{N}_2$  (ESI)  $[\text{M}]^+$ : calc.: 211.0978, found: 211.0979.

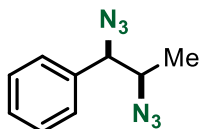

1,2-diazidopropyl)benzene

The reaction was carried out according to **the general alkene diazidation procedure** on 0.20-mmol scale (24 h). The residue was purified by flash column chromatography (ethyl acetate/*n*-pentane) to afford the diazide product **1,2-diazidopropyl)benzene (2g')** (28.7 mg, 71% yield, d.r. = 1.6:1) as an oil.  $^1\text{H NMR}$  (500 MHz, Chloroform-*d*)  $\delta$  7.45 – 7.30 (m, 5H), 4.52 (d,  $J = 5.8$  Hz, 0.62H), 4.37 (d,  $J = 7.7$  Hz, 0.39H), 3.75 – 3.63 (m, 1H), 1.26 (d,  $J = 6.6$  Hz, 2.36H), 1.11 (d,  $J = 6.7$  Hz, 1.21H).  $^{13}\text{C NMR}$  (101 MHz, Chloroform-*d*)  $\delta$  136.52, 136.29, 129.23, 129.09, 129.04, 127.80, 71.03, 69.89, 61.76, 61.28, 16.99, 15.29.

**HRMS** for  $\text{C}_9\text{H}_{11}\text{N}_6^+-\text{N}_2$  (ESI)  $[\text{M}]^+$ : calc.: 175.0978, found: 175.0979.

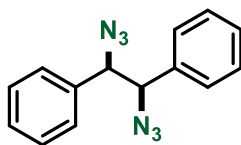

1,2-diazido-1,2-diphenylethane

The reaction was carried out according to **the general alkene diazidation procedure** on 0.20-mmol scale (24 h). The residue was purified by flash column chromatography (ethyl acetate/*n*-pentane) to afford the diazide product **1,2-diazido-1,2-diphenylethane (2h')** (33.8 mg, 64% yield, d.r. = 2.2:1) as an oil.  $^1\text{H NMR}$  (500 MHz, Chloroform-*d*)  $\delta$  7.30 (dd,  $J = 5.4, 1.9$  Hz, 2H), 7.21 – 7.12 (m, 5.46H), 6.99 (dd,  $J = 6.6, 3.0$  Hz, 2.71H), 4.61 (s, 0.62H), 4.56 (s, 1.37H).  $^{13}\text{C NMR}$  (101 MHz, Chloroform-*d*)  $\delta$  135.81, 135.75, 128.92, 128.66, 128.63, 128.52, 127.92, 127.63, 70.71, 69.65.

**HRMS** for  $\text{C}_{14}\text{H}_{13}\text{N}_6^+-\text{N}_2$  (ESI)  $[\text{M}]^+$ : calc.: 237.1135, found: 237.1139.

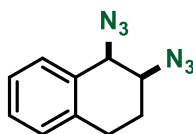

1,2-diazido-1,2,3,4-tetrahydronaphthalene

The reaction was carried out according to **the general alkene diazidation procedure** on 0.20-mmol scale (24 h). The residue was purified by flash column chromatography (ethyl acetate/*n*-pentane) to afford the diazide product **1,2-diazido-1,2,3,4-tetrahydronaphthalene (2i')** (32.1 mg, 75% yield, d.r. = 4.9:1) as an oil. **<sup>1</sup>H NMR** (500 MHz, Chloroform-*d*)  $\delta$  7.30 (dd,  $J = 5.6, 3.6$  Hz, 1H), 7.21 – 7.18 (m, 2H), 7.07 (dd,  $J = 5.4, 3.6$  Hz, 1H), 4.59 – 4.55 (m, 0.17H), 4.36 (d,  $J = 6.6$  Hz, 0.84H), 3.80 (ddd,  $J = 8.8, 6.7, 3.2$  Hz, 0.87H), 3.73 (dt,  $J = 11.5, 3.4$  Hz, 0.17H), 2.90 – 2.78 (m, 2H), 2.20 – 2.14 (m, 1H), 1.95 – 1.87 (m, 1H). **<sup>13</sup>C NMR** (101 MHz, Chloroform-*d*)  $\delta$  135.64, 135.35, 131.69, 131.51, 129.59, 129.30, 129.00, 128.96, 128.53, 126.71, 126.57, 63.49, 62.52, 61.54, 59.73, 27.37, 25.97, 25.10, 22.83. **HRMS** for C<sub>10</sub>H<sub>11</sub>N<sub>6</sub><sup>+</sup>-N<sub>2</sub> (ESI) [M]<sup>+</sup>: calc.: 187.0978, found: 187.0976.



## 2.3 Synthetic utilization

### General Procedure for Scaling Up in Batch Reactor

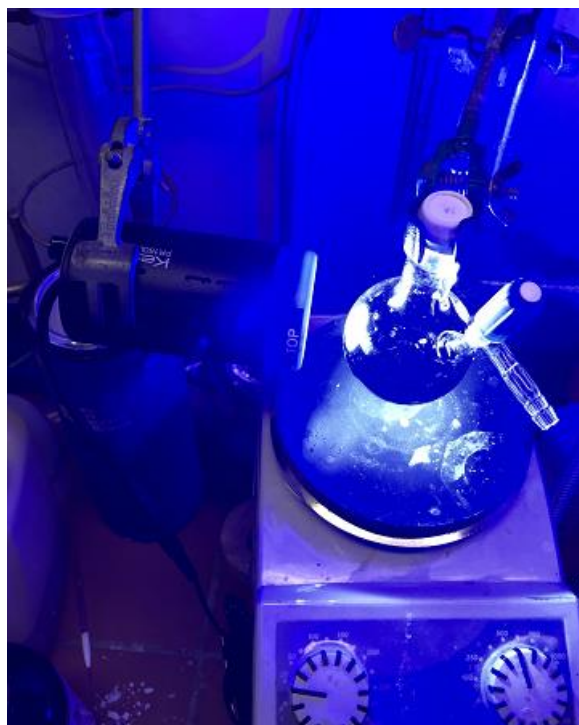

Supplementary Figure 2. Batch reactor set-up with light irradiation

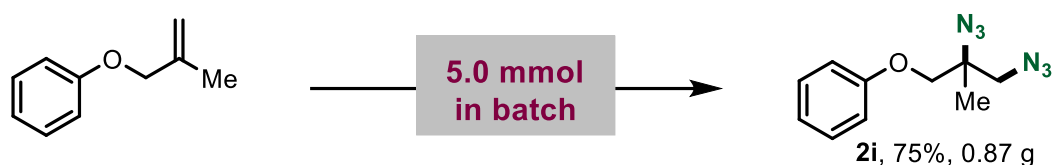

A 100 mL Schlenk tube equipped with a magnetic stir bar was charged with  $\text{Fe}(\text{NO}_3)_3 \cdot 9\text{H}_2\text{O}$  (5.5 mmol, 2.22 g). Then, the tube was evacuated and backfilled with Ar (three times). ((2-methylallyl)oxy)benzene (0.74 g, 5.0 mmol, 1.0 equiv.) and  $\text{TMSN}_3$  (22 mmol, 2.53 g) in  $\text{CH}_3\text{CN}$  (50 mL) were added by syringe under Ar atmosphere. The reaction tube was then sealed and was placed at a distance (app. 5 cm) from a 40 W blue kessil lamp (Figure S2). The reaction mixture was stirred for 36 h at room temperature. After the reaction, the resulting solution was filtered through a cotton plug and washed with EtOAc. The filtrate was removed under reduced pressure and the residue was purified by silica gel column chromatography (ethyl acetate/*n*-pentane) to afford the desired diazide **2i** (0.87 g, 75%).

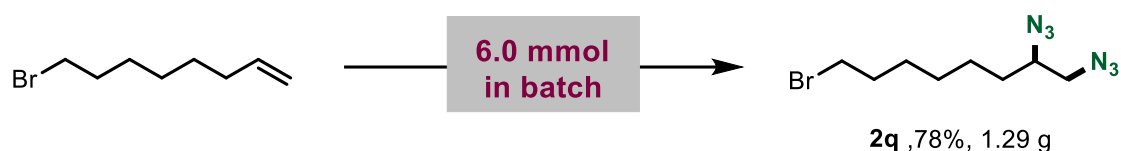

A 100 mL Schlenk tube equipped with a magnetic stir bar was charged with  $\text{Fe}(\text{NO}_3)_3 \cdot 9\text{H}_2\text{O}$  (6.6 mmol, 2.45 g). Then, the tube was evacuated and backfilled with Ar (three times). 8-bromooct-1-ene (1.14 g, 6.0 mmol, 1.0 equiv.) and  $\text{TMSN}_3$  (25 mmol, 2.88 g) in  $\text{CH}_3\text{CN}$  (60 mL) were added by syringe under Ar atmosphere. The reaction tube was then sealed and was placed at a distance (app. 5 cm) from a 40 W blue kessil lamp (Figure S2). The reaction mixture was stirred for 36 h at room temperature. After the reaction, the resulting solution was filtered through a cotton plug and washed with EtOAc. The filtrate was removed under reduced pressure and the residue was purified by silica gel column chromatography (ethyl acetate/*n*-pentane) to afford the desired diazide **2q** (1.29 g, 75%).

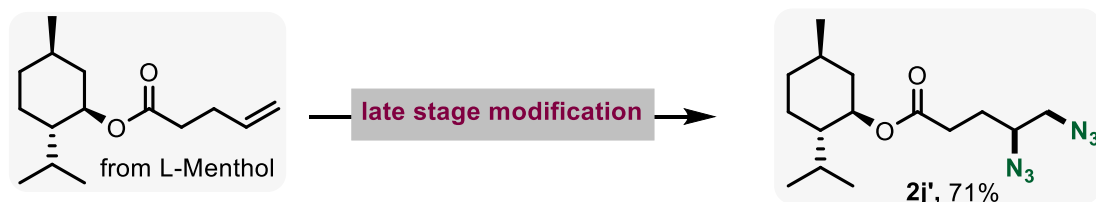

A 10 mL Schlenk tube equipped with a magnetic stir bar was charged with  $\text{Fe}(\text{NO}_3)_3 \cdot 9\text{H}_2\text{O}$  (0.12 mmol, 50 mg). Then, the tube was evacuated and backfilled with Ar (three times). Alkene (23.8 mg, 0.10 mmol, 1.0 equiv.) and  $\text{TMSN}_3$  (0.44 mmol) in  $\text{CH}_3\text{CN}$  (2 mL) were added by syringe under Ar atmosphere. The reaction tube was then sealed and was placed at a distance (app. 5 cm) from a 40 W blue kessil lamp (Figure S1). The reaction mixture was stirred for 24 h at room temperature. After the reaction, the resulting solution was filtered through a cotton plug and washed with EtOAc. The filtrate was removed under reduced pressure and the residue was purified by silica gel column chromatography (ethyl acetate/*n*-pentane) to afford the desired diazide **(1*R*,2*S*,5*R*)-2-isopropyl-5-methylcyclohexyl-4,5-diazidopentanoate 2j'** (22.9 mg, 71% yield, d.r. = 1:1).  $^1\text{H}$  NMR (500 MHz,

Chloroform-*d*)  $\delta$  4.74 – 4.66 (m, 1H), 3.60 – 3.53 (m, 1H), 3.44 (dd,  $J = 12.7, 4.1$  Hz, 1H), 3.35 (dd,  $J = 12.8, 7.5$  Hz, 1H), 2.48 – 2.41 (m, 2H), 2.00 – 1.95 (m, 1H), 1.94 – 1.87 (m, 1H), 1.85 – 1.81 (m, 1H), 1.79 – 1.72 (m, 1H), 1.70 – 1.66 (m, 2H), 1.52 – 1.45 (m, 1H), 1.41 – 1.33 (m, 1H), 1.10 – 1.03 (m, 1H), 1.01 – 0.94 (m, 1H), 0.92 – 0.88 (m, 7H), 0.76 (dd,  $J = 6.9, 1.9$  Hz, 3H).  $^{13}\text{C}$  NMR (101 MHz, Chloroform-*d*)  $\delta$  171.96, 74.68, 74.67, 61.23, 61.21, 54.88, 47.03, 46.99, 40.92, 40.89, 34.20, 31.38, 30.66, 30.65, 27.15, 27.12, 26.39, 26.36, 23.44, 21.98, 20.72, 20.70, 16.30, 16.29.

**HRMS** for  $\text{C}_{15}\text{H}_{27}\text{N}_6\text{O}_2^+-\text{N}_2$  (ESI)  $[\text{M}]^+$ : calc.: 295.2129, found: 295.2128.

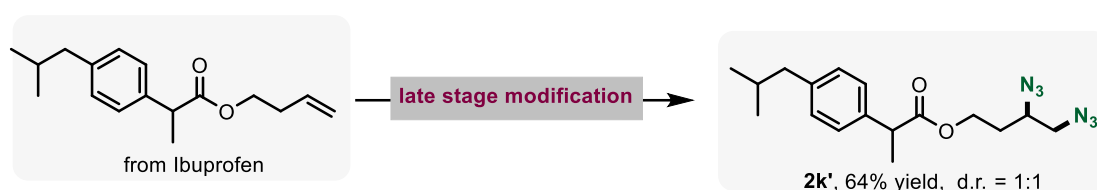

A 10 mL Schlenk tube equipped with a magnetic stir bar was charged with  $\text{Fe}(\text{NO}_3)_3 \cdot 9\text{H}_2\text{O}$  (0.24 mmol, 100 mg). Then, the tube was evacuated and backfilled with Ar (three times). Ibuprofen derivative (52.0 mg, 0.20 mmol, 1.0 equiv.) and  $\text{TMSN}_3$  (1.0 mmol) in  $\text{CH}_3\text{CN}$  (2 mL) were added by syringe under Ar atmosphere. The reaction tube was then sealed and was placed at a distance (app. 5 cm) from a 40 W blue kessil lamp (Figure S1). The reaction mixture was stirred for 24 h at room temperature. After the reaction, the resulting solution was filtered through a cotton plug and washed with EtOAc. The filtrate was removed under reduced pressure and the residue was purified by silica gel column chromatography (ethyl acetate/*n*-pentane) to afford the desired diazide **3,4-diazidobutyl 2-(4-isobutylphenyl)propanoate 2k'** (44.1 mg, 64% yield, d.r. = 1:1).  $^1\text{H}$  NMR (500 MHz, Chloroform-*d*)  $\delta$  7.19 (d,  $J = 7.8$  Hz, 2H), 7.11 (d,  $J = 7.8$  Hz, 2H), 4.33 – 4.08 (m, 2H), 3.70 (q,  $J = 7.2$  Hz, 1H), 3.37 – 3.12 (m, 3H), 2.45 (d,  $J = 7.2$  Hz, 2H), 1.89 – 1.65 (m, 3H), 1.50 (d,  $J = 7.2$  Hz, 3H), 0.90 (d,  $J = 7.6$  Hz, 6H).  $^{13}\text{C}$  NMR (101 MHz, Chloroform-*d*)  $\delta$  174.39, 140.81, 140.77, 137.54, 137.48, 129.43, 127.07, 60.64, 60.56, 58.91, 58.88, 54.71, 54.67, 45.11, 45.07, 44.99, 30.84, 30.79, 30.15, 22.34, 18.11.

**HRMS** for  $\text{C}_{17}\text{H}_{25}\text{N}_6\text{O}_2^+-\text{N}_2$  (ESI)  $[\text{M}]^+$ : calc.: 317.1972, found: 317.1974.

## 2.4 Mechanistic Investigations

### The analysis for the reaction mixture by GC-MS

A 10 mL Schlenk tube equipped with a magnetic stir bar was charged with  $\text{Fe}(\text{NO}_3)_3 \cdot 9\text{H}_2\text{O}$  (0.24 mmol, 100 mg). Then, the tube was evacuated and backfilled with Ar (three times). Alkene **1a** (29.2 mg, 0.20 mmol, 1.0 equiv.) and  $\text{TMSN}_3$  (1.0 mmol) in  $\text{CH}_3\text{CN}$  (2 mL) were added by syringe under Ar atmosphere. The reaction tube was then sealed and was placed at a distance (app. 5 cm) from a 40 W blue kessil lamp (Figure S1). The reaction mixture was stirred for 24 h at room temperature. The reaction mixture was analyzed by GC-MS.

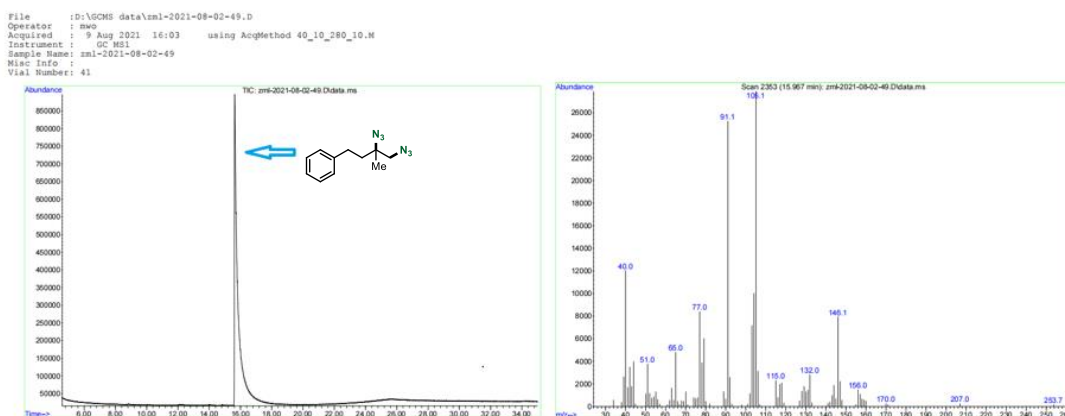

Supplementary Figure 3. Spectra of the reaction mixture by GC-MS analysis.

### Control Experiment with Additives

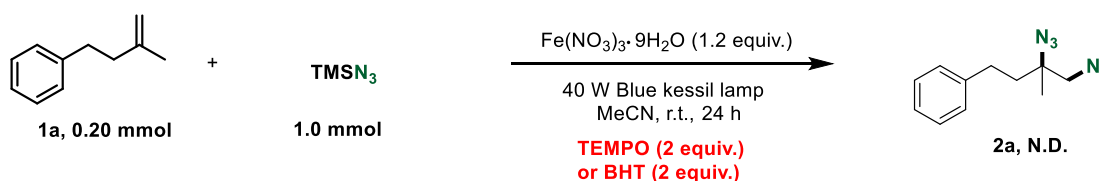

A 10 mL Schlenk tube equipped with a magnetic stir bar was charged with  $\text{Fe}(\text{NO}_3)_3 \cdot 9\text{H}_2\text{O}$  (0.24 mmol, 100 mg) and TEMPO or BHT (0.4 mmol, 2 equiv.). Then, the tube was evacuated and backfilled with Ar (three times). Alkene **1a** (29.2 mg, 0.20 mmol, 1.0 equiv.) and  $\text{TMSN}_3$  (1.0 mmol) in  $\text{CH}_3\text{CN}$  (2 mL) were added by syringe under Ar atmosphere. The reaction tube was then sealed and was placed at a distance (app. 5 cm) from a 40 W blue kessil lamp (Figure S1). The reaction mixture was stirred for 24 h at room temperature. The corresponding diazide product **2a** was

not detected according to both TLC and GC-Mass analysis. The TEMPO-adduct **3** was detected by ESI-HRMS.

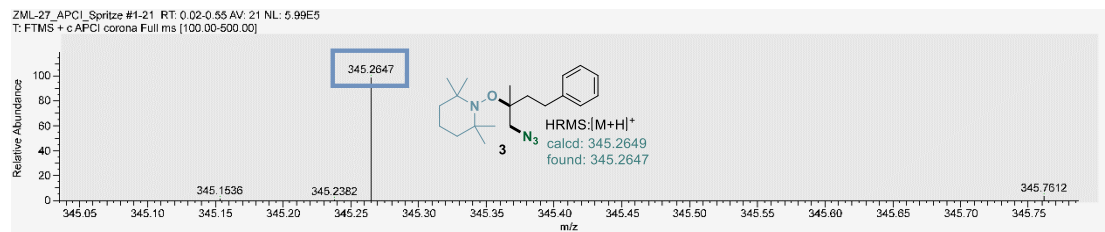

**Supplementary Figure 4. ESI-HRMS Spectra using TEMPO**

### Radical cyclic experiments

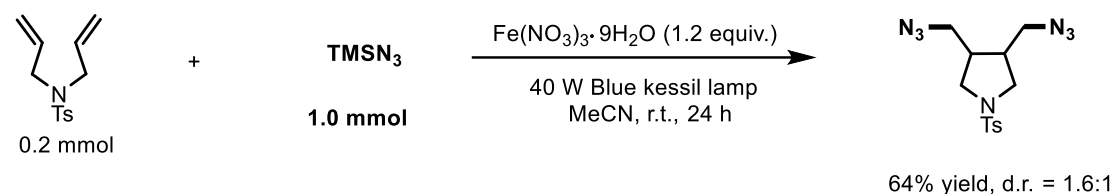

A 10 mL Schlenk tube equipped with a magnetic stir bar was charged with  $\text{Fe}(\text{NO}_3)_3 \cdot 9\text{H}_2\text{O}$  (0.24 mmol, 100 mg). Then, the tube was evacuated and backfilled with Ar (three times). *N,N*-diallyl-4-methylbenzenesulfonamide (50.2 mg, 0.20 mmol, 1.0 equiv.) and  $\text{TMSN}_3$  (1.0 mmol) in  $\text{CH}_3\text{CN}$  (2 mL) were added by syringe under Ar atmosphere. The reaction tube was then sealed and was placed at a distance (app. 5 cm) from a 40 W blue kessil lamp (Figure S1). The reaction mixture was stirred for 24 h at room temperature. After the reaction, the resulting solution was filtered through a cotton plug and washed with EtOAc. The filtrate was removed under reduced pressure and the residue was purified by silica gel column chromatography (ethyl acetate/*n*-pentane) to afford the product **3,4-bis(azidomethyl)-1-tosylpyrrolidine** (42.9 mg, 64% yield) as an oil.  $^1\text{H}$  NMR (500 MHz, Chloroform-*d*)  $\delta$  7.75 – 7.70 (m, 2H), 7.36 (d,  $J$  = 8.0 Hz, 2H), 3.45 – 3.36 (m, 2H), 3.34 – 3.26 (m, 2H), 3.26 – 3.21 (m, 0.62H), 3.18 – 3.09 (m, 2.55H), 3.02 (dd,  $J$  = 10.4, 6.1 Hz, 0.58H), 2.45 – 2.43 (m, 3H), 2.41 – 2.36 (m, 1.33H), 2.13 – 2.08 (m, 0.55H).  $^{13}\text{C}$  NMR (101 MHz, Chloroform-*d*)  $\delta$  143.95, 143.88, 133.38, 132.69, 129.79, 129.65, 127.71, 127.49, 52.83, 50.59, 50.27, 49.61, 41.22, 39.82, 21.56, 21.53.

### Exclusion of radical-polar crossover pathway

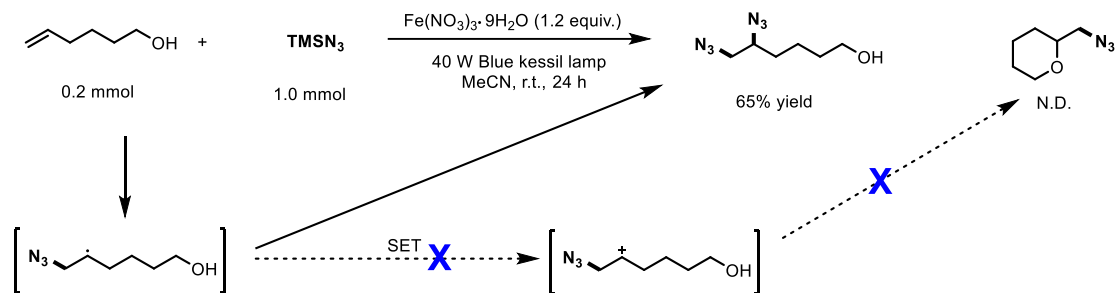

A 10 mL Schlenk tube equipped with a magnetic stir bar was charged with  $\text{Fe}(\text{NO}_3)_3 \cdot 9\text{H}_2\text{O}$  (0.24 mmol, 100 mg). Then, the tube was evacuated and backfilled with Ar (three times). hex-5-en-1-ol (20.0 mg, 0.20 mmol, 1.0 equiv.) and  $\text{TMSN}_3$  (1.0 mmol) in  $\text{CH}_3\text{CN}$  (2 mL) were added by syringe under Ar atmosphere. The reaction tube was then sealed and was placed at a distance (app. 5 cm) from a 40 W blue kessil lamp (Figure S1). The reaction mixture was stirred for 24 h at room temperature. After the reaction, the resulting solution was filtered through a cotton plug and washed with EtOAc. The filtrate was removed under reduced pressure and the residue was purified by silica gel column chromatography (ethyl acetate/*n*-pentane) to afford the product 5,6-diazidohexan-1-ol (23.9 mg, 65% yield) as an oil. And no cyclic product was observed by MS analysis.

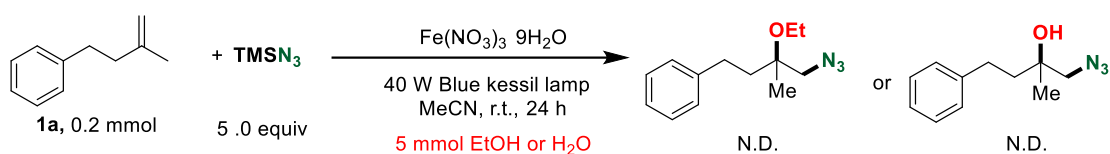

The intermolecular trapping experiments were performed with a large excess of nucleophiles such as  $\text{H}_2\text{O}$  and EtOH added into reaction system, however, the compounds trapped by nucleophiles could not be detected. A radical-polar crossover mechanism should be excluded.

### 3. Supplementary Notes

#### 3.1 Copies of $^1\text{H}$ , $^{13}\text{C}$ and $^{19}\text{F}$ NMR spectra

Supplementary Figure 5.  $^1\text{H}$  NMR (500 MHz,  $\text{CDCl}_3$ , 298K) of (3,4-diazido-3-methylbutyl)benzene

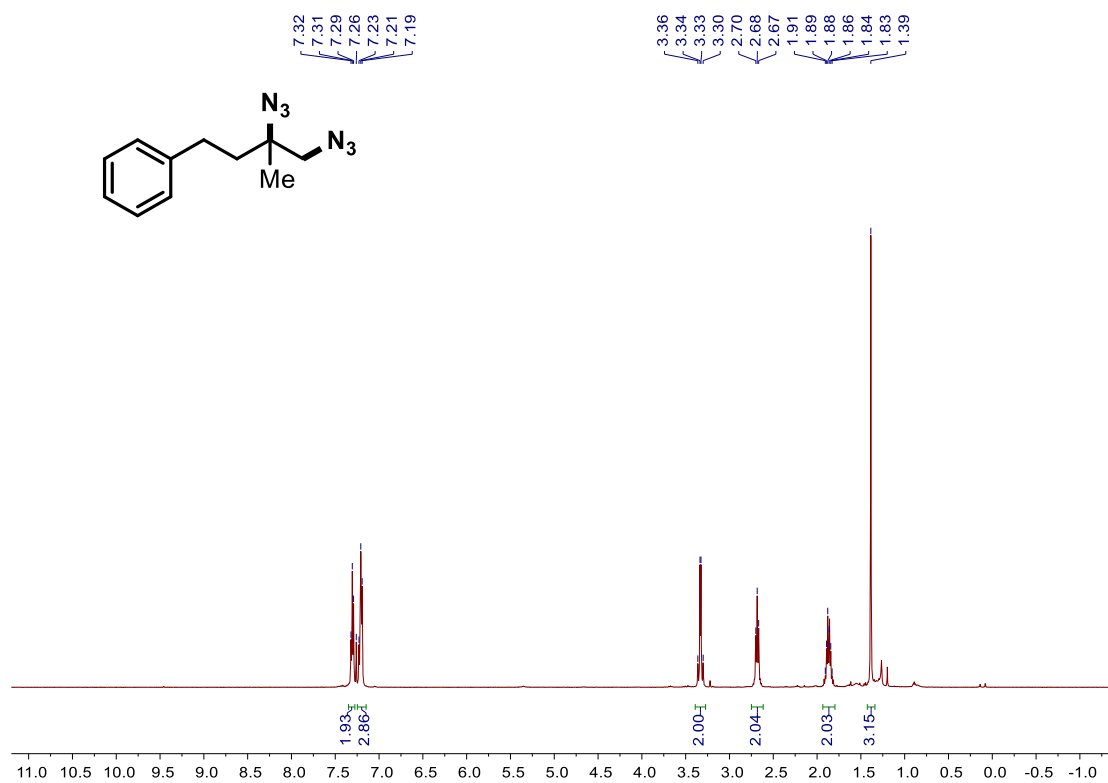

Supplementary Figure 6.  $^{13}\text{C}$  NMR (101 MHz,  $\text{CDCl}_3$ , 298K) of (3,4-diazido-3-methylbutyl)benzene

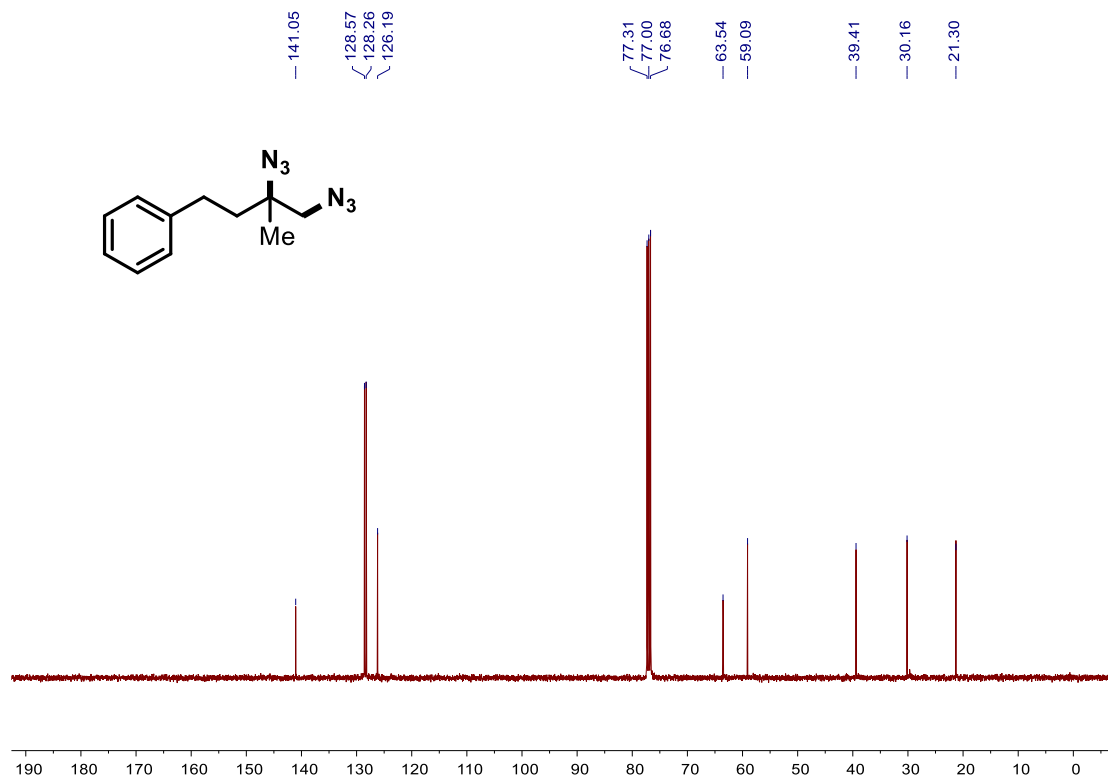

Supplementary Figure 7.  $^1\text{H}$  NMR (500 MHz,  $\text{CDCl}_3$ , 298K) of 1-(3,4-diazido-3-methylbutyl)-4-methylbenzene

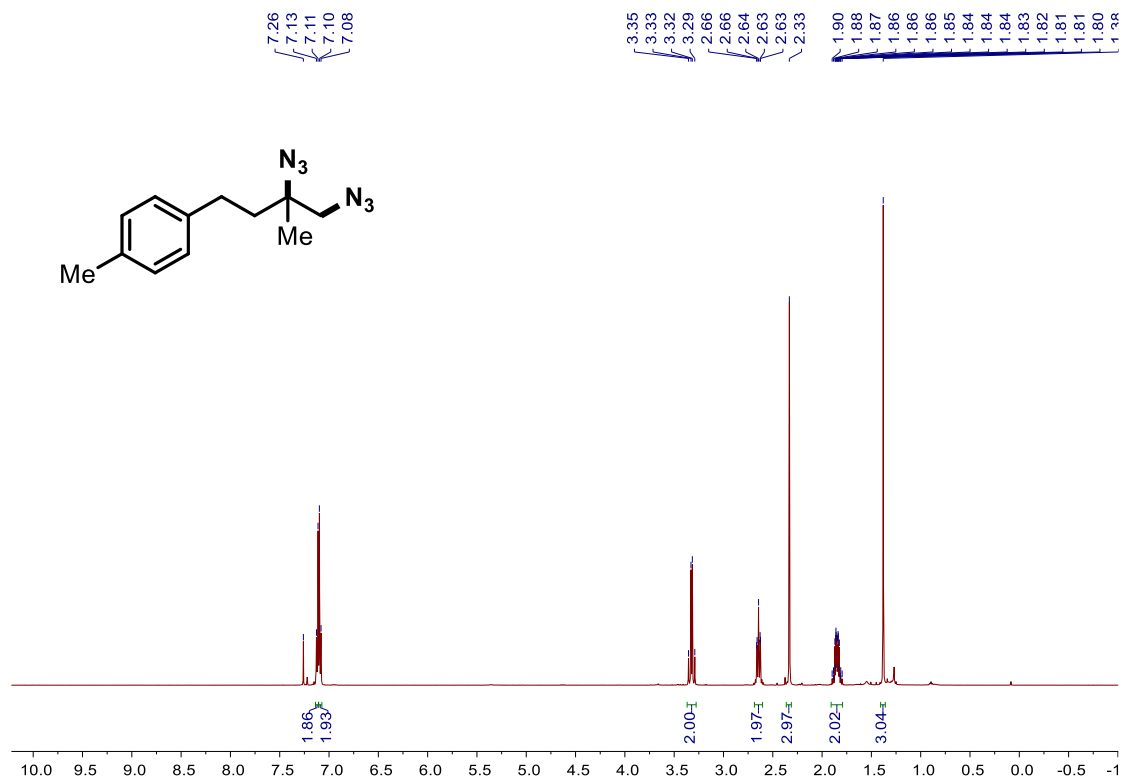

Supplementary Figure 8.  $^{13}\text{C}$  NMR (101 MHz,  $\text{CDCl}_3$ , 298K) of 1-(3,4-diazido-3-methylbutyl)-4-methylbenzene

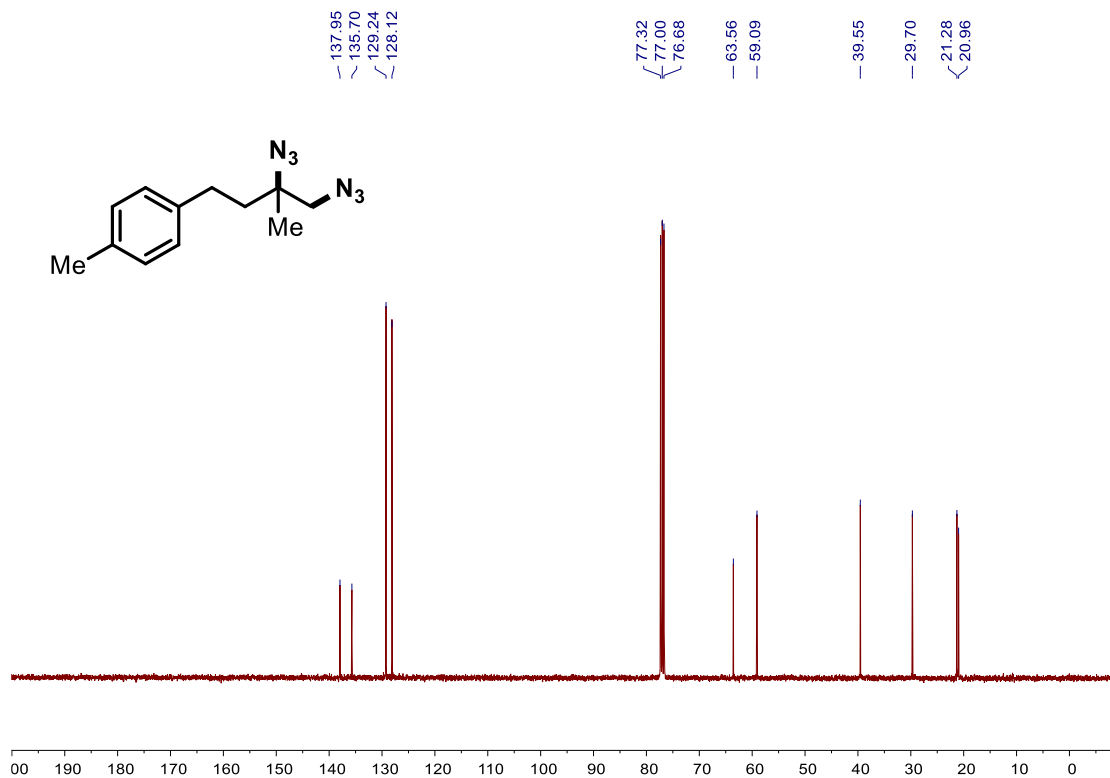



Supplementary Figure 9.  $^1\text{H}$  NMR (500 MHz,  $\text{CDCl}_3$ , 298K) of 1-(3,4-diazido-3-methylbutyl)-4-(trifluoromethyl)benzene

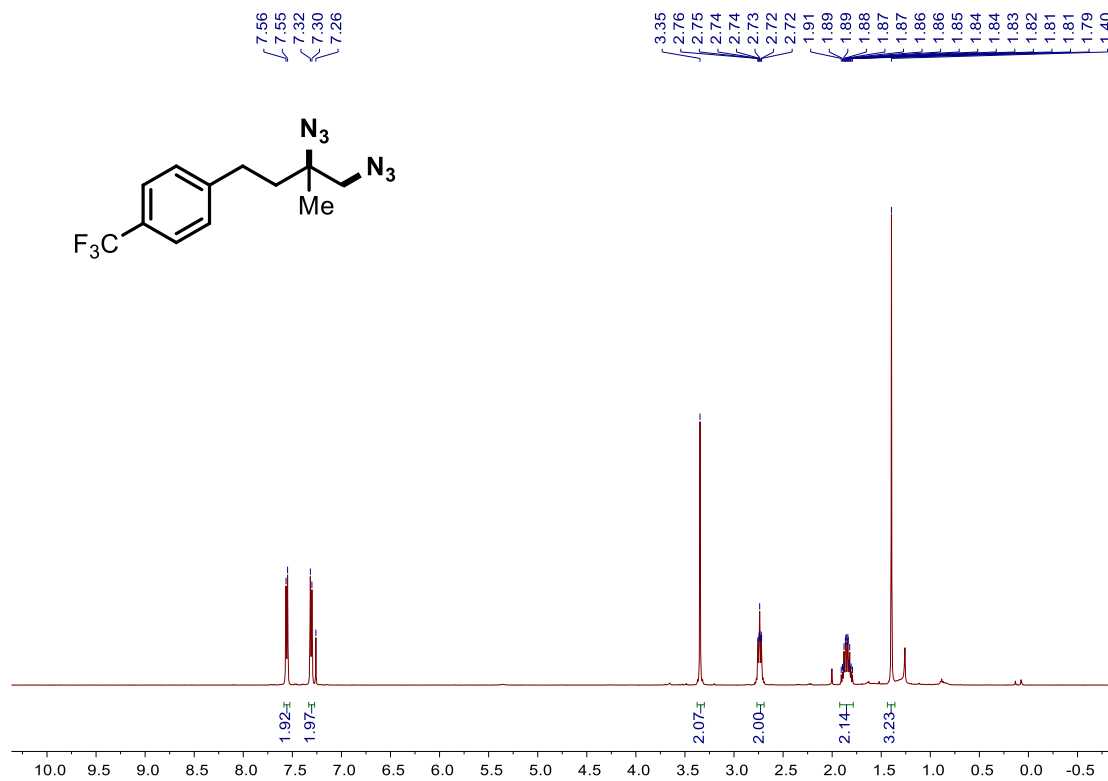

Supplementary Figure 10.  $^{13}\text{C}$  NMR (101 MHz,  $\text{CDCl}_3$ , 298K) of 1-(3,4-diazido-3-methylbutyl)-4-(trifluoromethyl)benzene

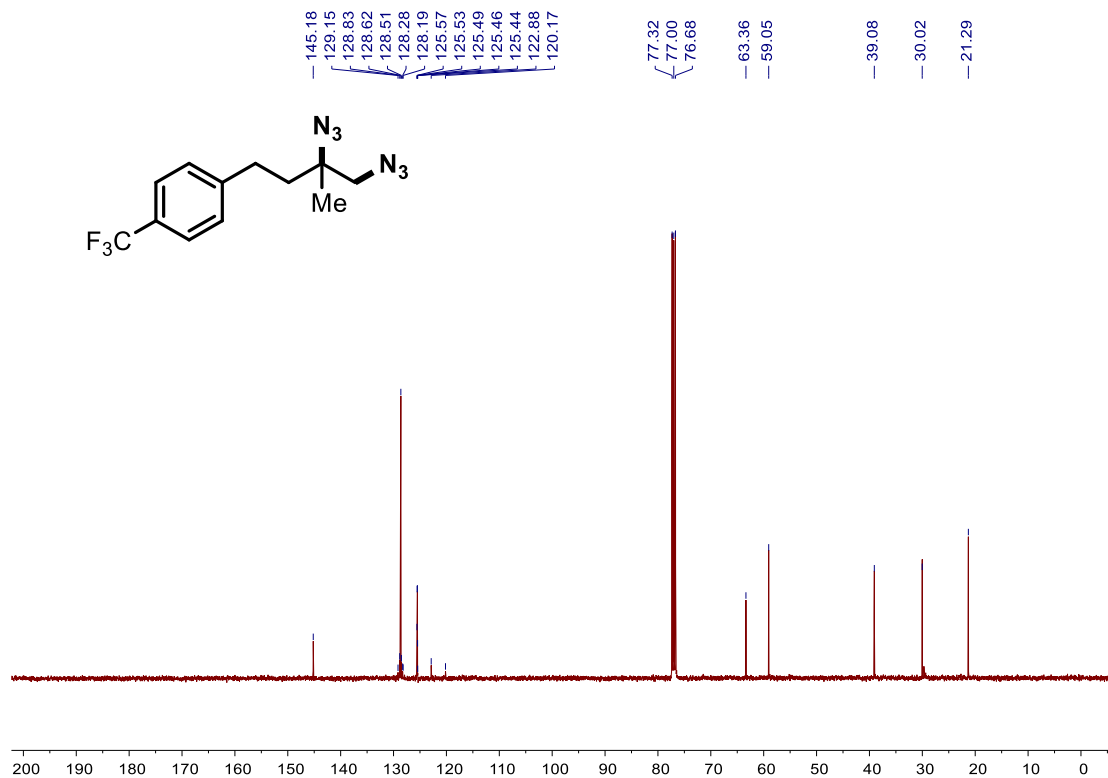

**Supplementary Figure 11.**  $^{19}\text{F}$  NMR (471 MHz,  $\text{CDCl}_3$ , 298K) of 1-(3,4-diaziido-3-methylbutyl)-4-(trifluoromethyl)benzene

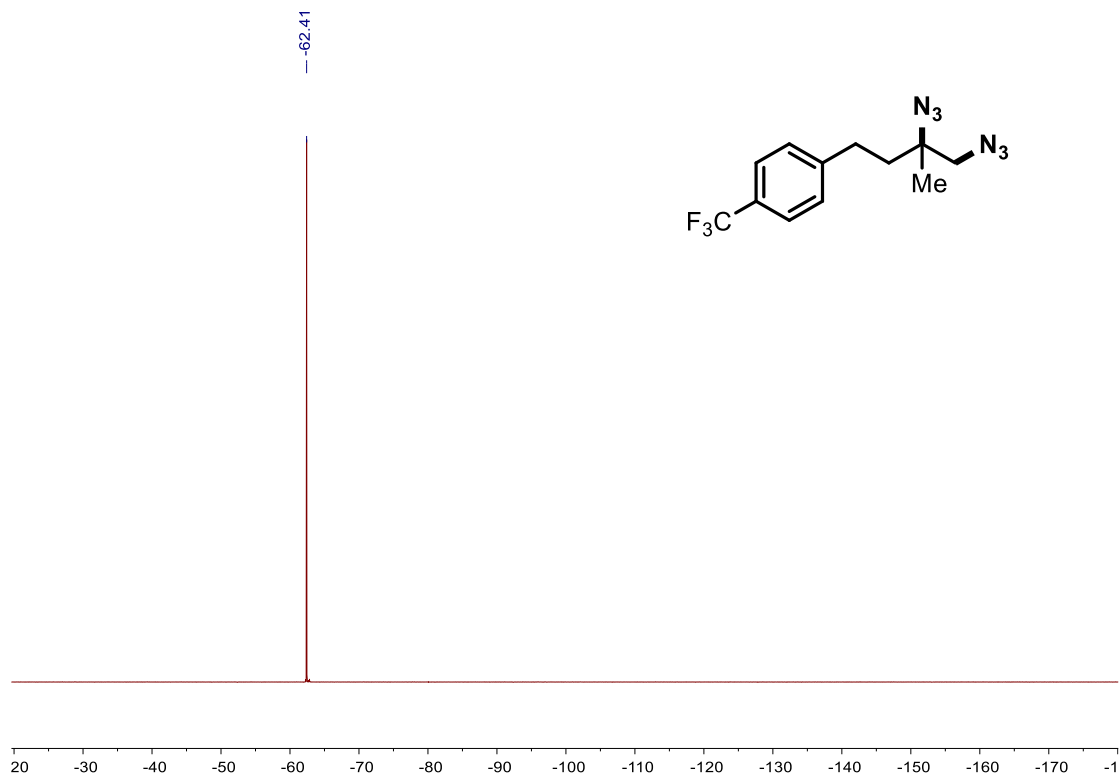

**Supplementary Figure 12.**  $^1\text{H}$  NMR (500 MHz,  $\text{CDCl}_3$ , 298K) of 1-bromo-4-(3,4-diaziido-3-methylbutyl)benzene

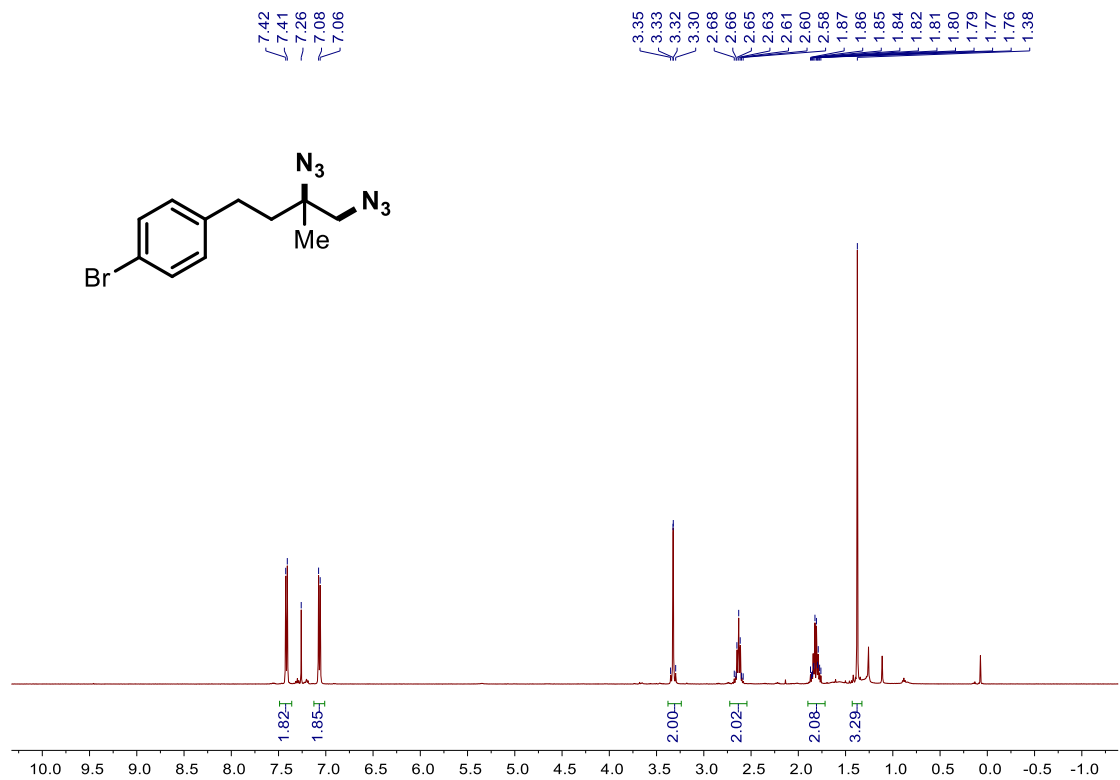

**Supplementary Figure 13.**  $^{13}\text{C}$  NMR (101 MHz,  $\text{CDCl}_3$ , 298K) of 1-bromo-4-(3,4-diazido-3-methylbutyl)benzene

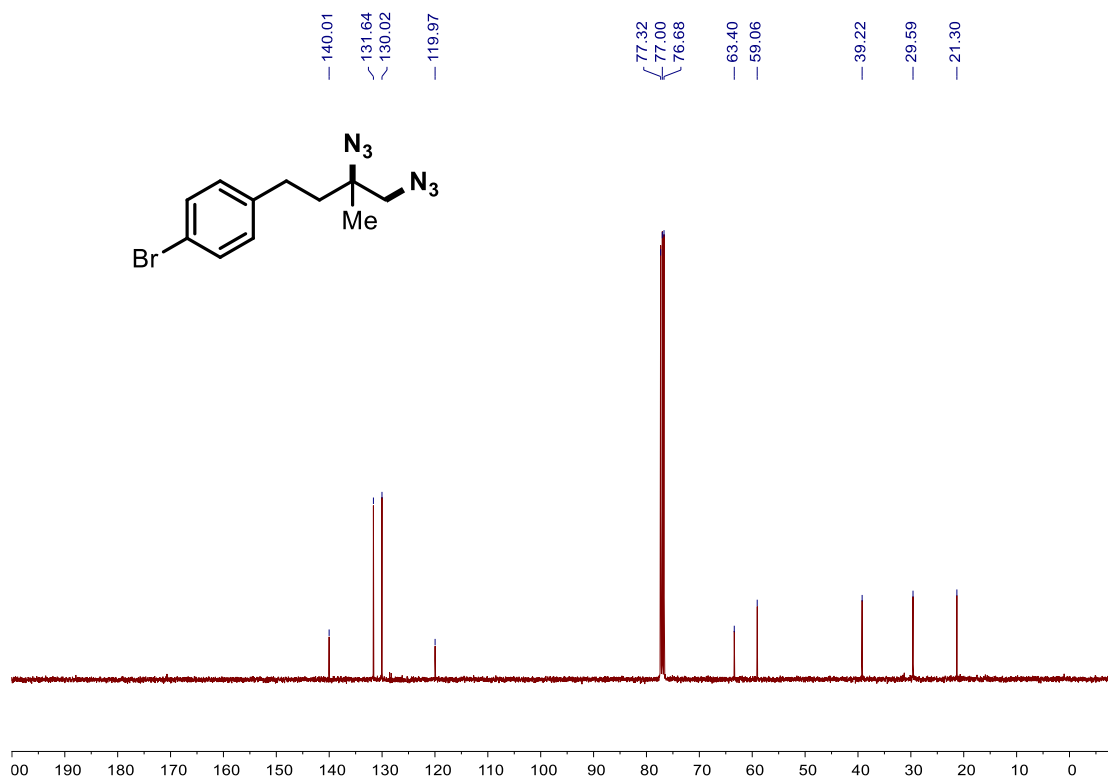

**Supplementary Figure 14.**  $^1\text{H}$  NMR (500 MHz,  $\text{CDCl}_3$ , 298K) of 1-(3,4-diazido-3-methylbutyl)-3-methoxybenzene

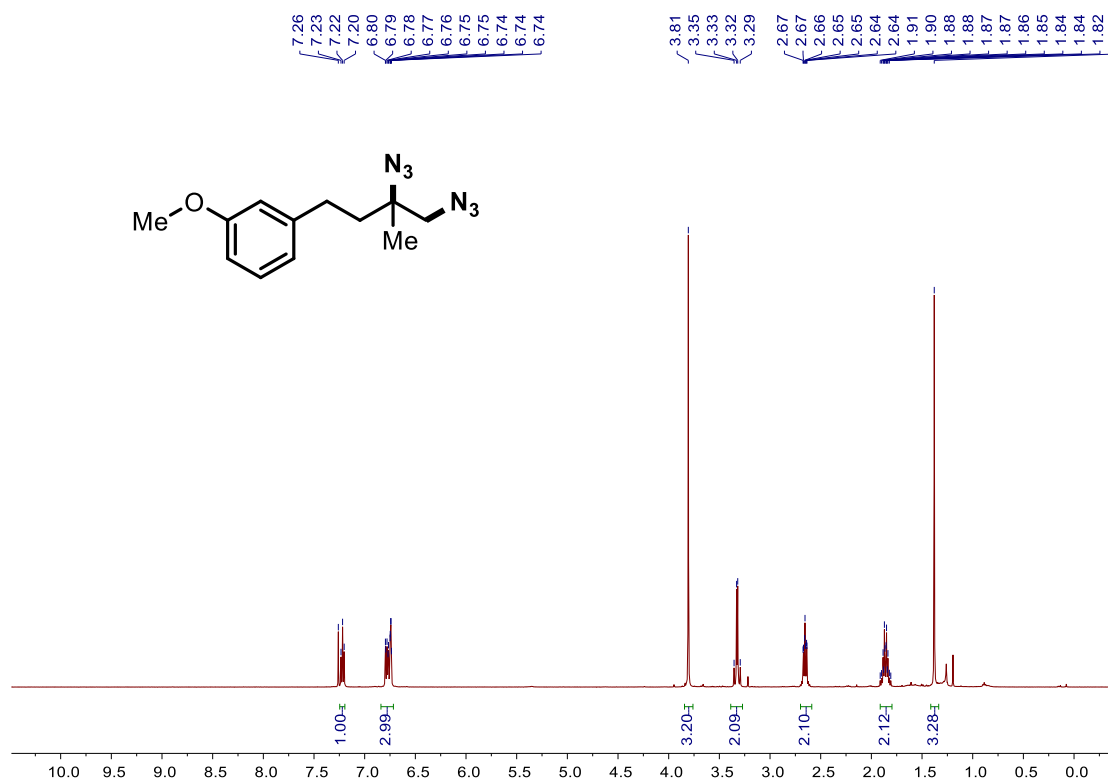

**Supplementary Figure 15.**  $^{13}\text{C}$  NMR (101 MHz,  $\text{CDCl}_3$ , 298K) of 1-(3,4-diazido-3-methylbutyl)-3-methoxybenzene

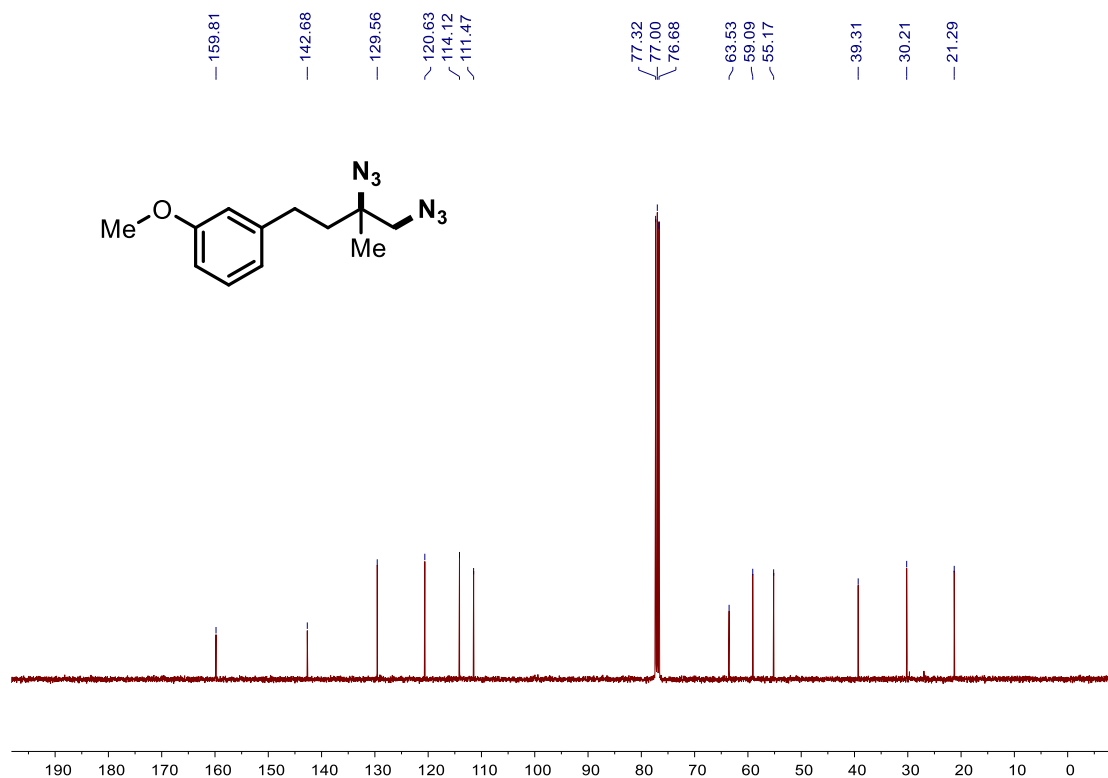

**Supplementary Figure 16.**  $^1\text{H}$  NMR (500 MHz,  $\text{CDCl}_3$ , 298K) of 1-chloro-2-(3,4-diazido-3-methylbutyl)benzene

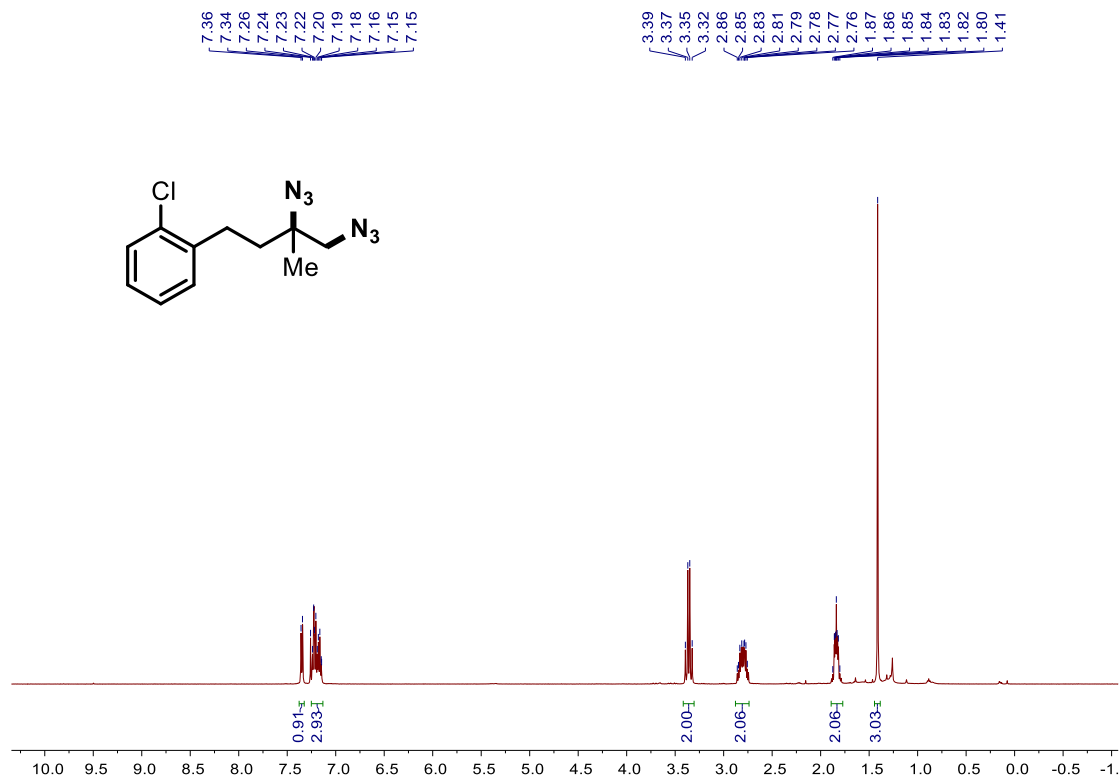

**Supplementary Figure 17.  $^{13}\text{C}$  NMR (101 MHz,  $\text{CDCl}_3$ , 298K) of 1-chloro-2-(3,4-diazido-3-methylbutyl)benzene**

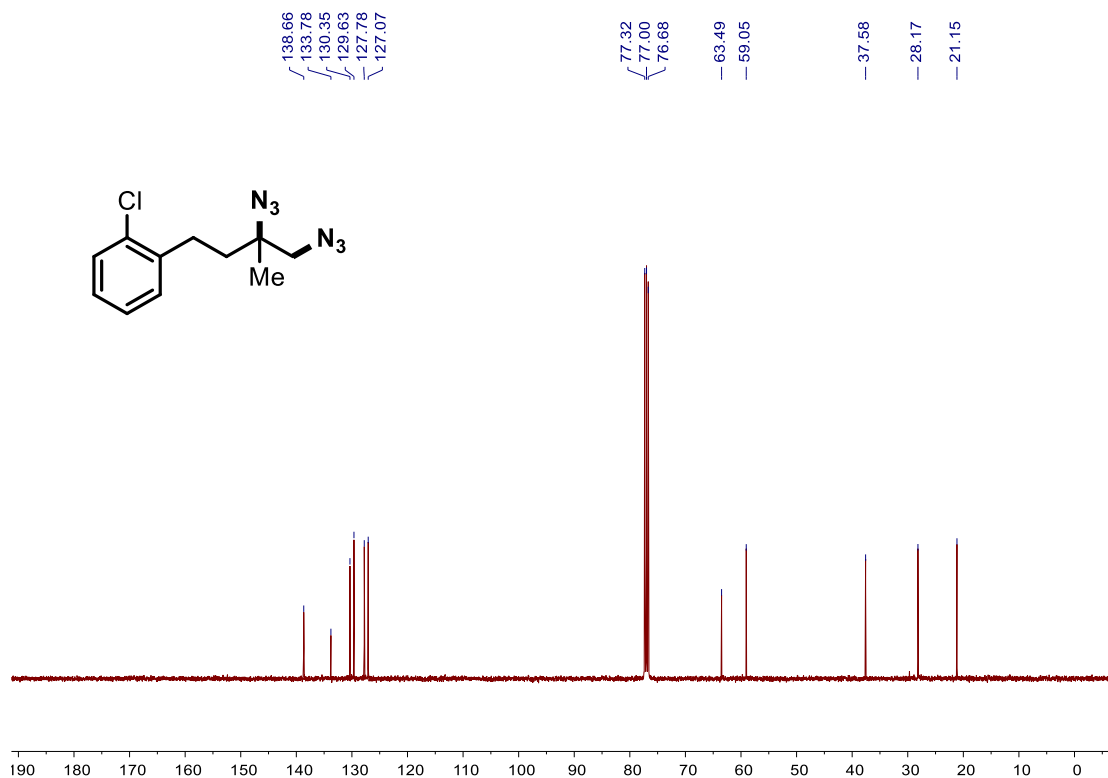

**Supplementary Figure 18.  $^1\text{H}$  NMR (500 MHz,  $\text{CDCl}_3$ , 298K) of 2-(3,4-diazido-3-methylbutyl)naphthalene**

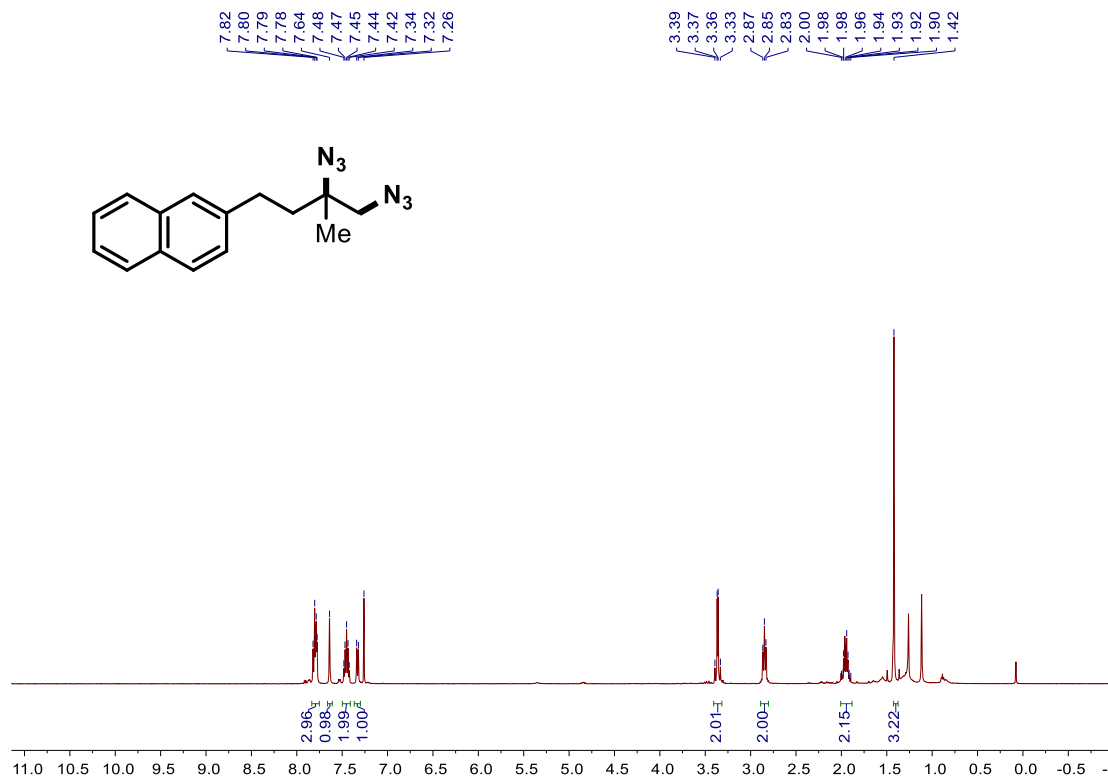

**Supplementary Figure 19.**  $^{13}\text{C}$  NMR (101 MHz,  $\text{CDCl}_3$ , 298K) of 2-(3,4-diazido-3-methylbutyl)naphthalene

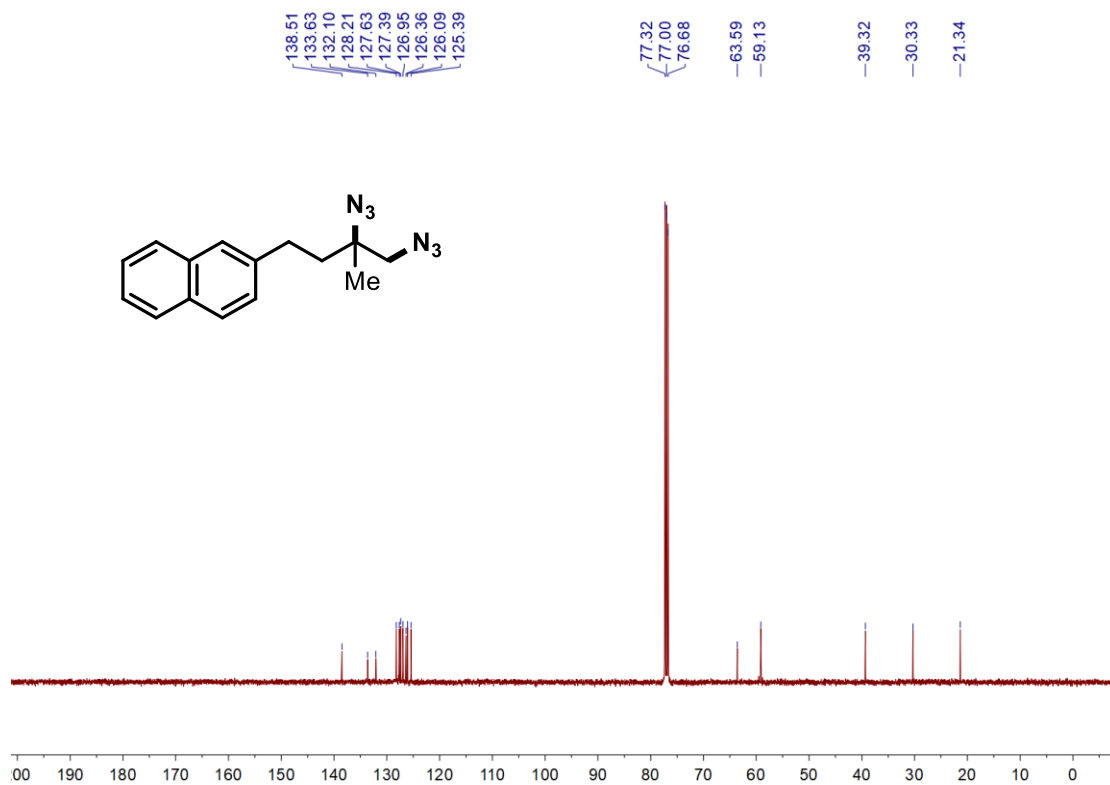

**Supplementary Figure 20.**  $^1\text{H}$  NMR (500 MHz,  $\text{CDCl}_3$ , 298K) of 1-(3,4-diazido-3-methylbutyl)-2,3,5,6-tetrafluoro-4-methylbenzene

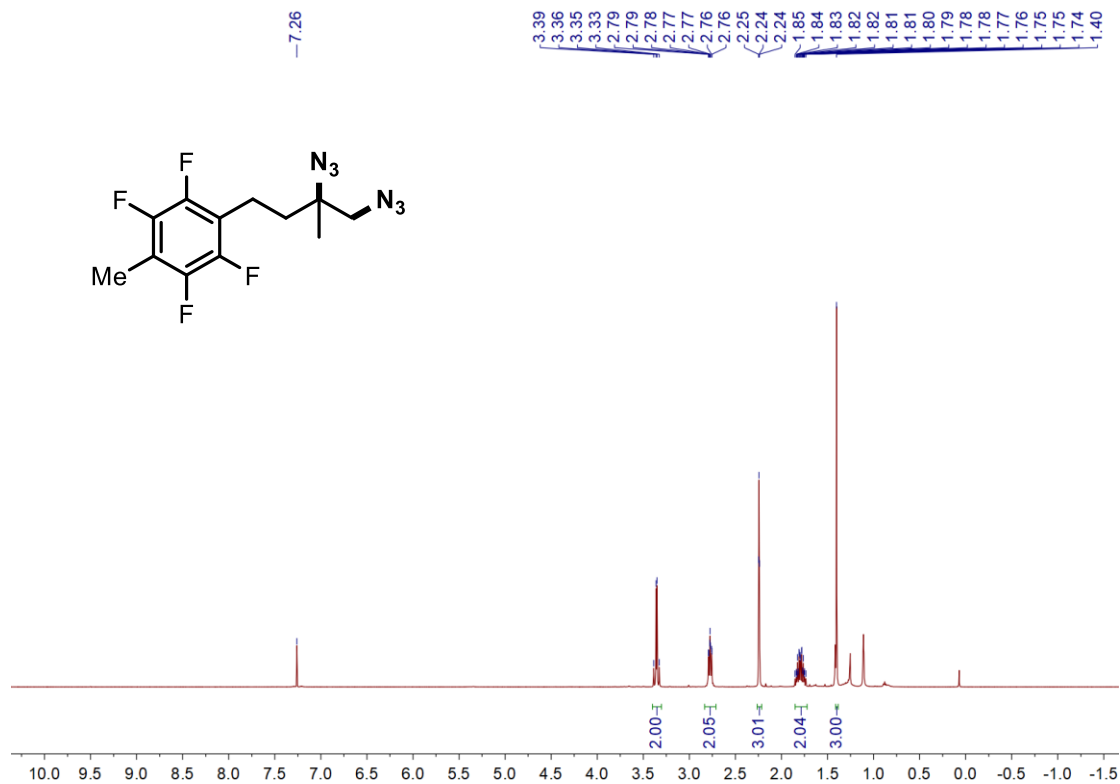

Supplementary Figure 21.  $^{13}\text{C}$  NMR (101 MHz,  $\text{CDCl}_3$ , 298K) of 1-(3,4-diazido-3-methylbutyl)-2,3,5,6-tetrafluoro-4-methylbenzene

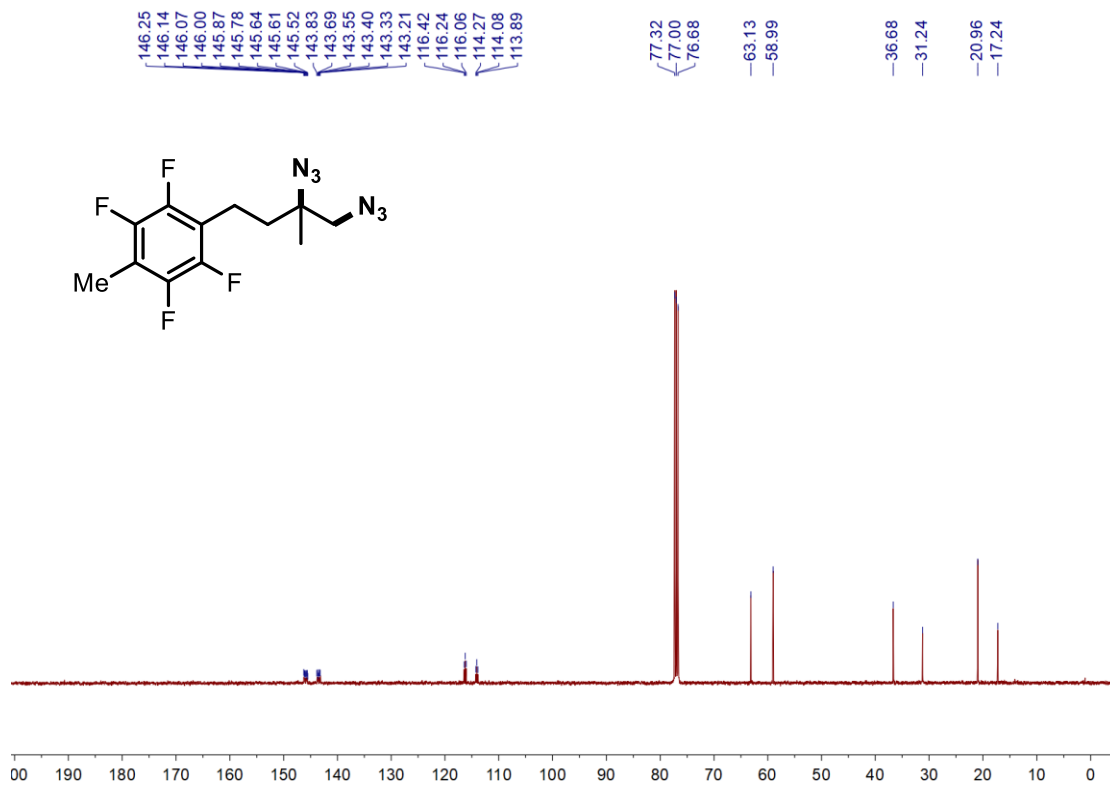

Supplementary Figure 22.  $^{19}\text{F}$  NMR (471 MHz,  $\text{CDCl}_3$ , 298K) of 1-(3,4-diazido-3-methylbutyl)-2,3,5,6-tetrafluoro-4-methylbenzene

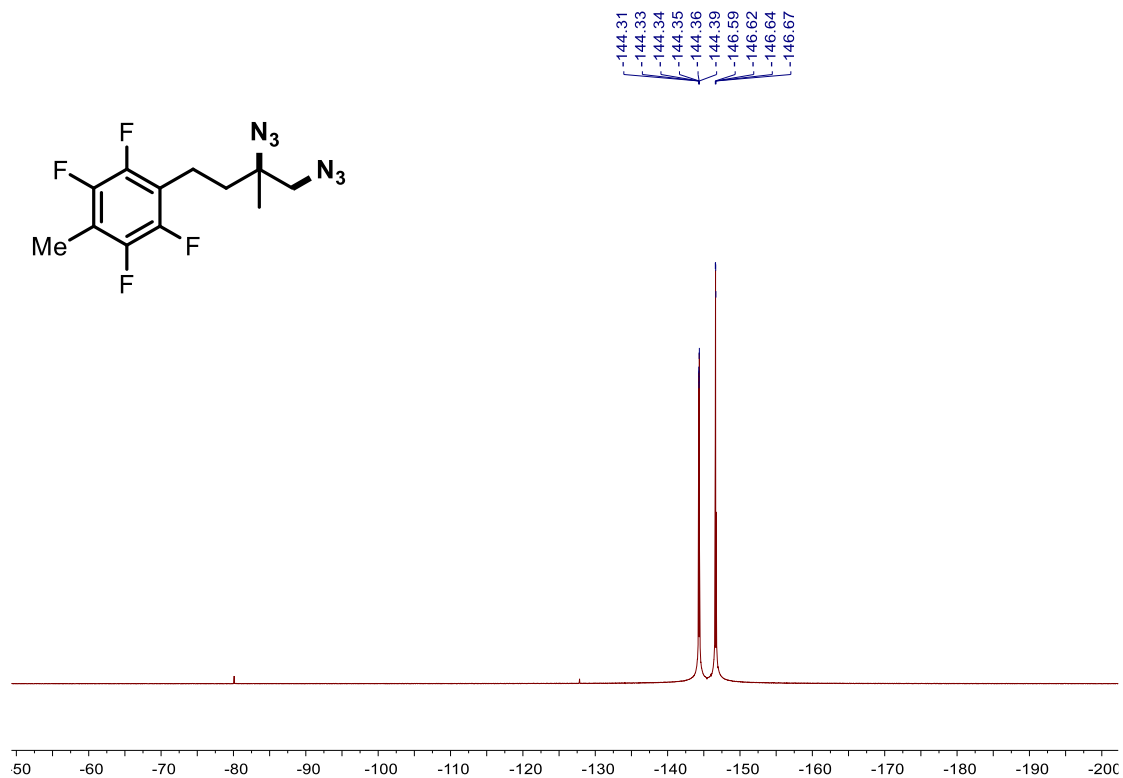

Supplementary Figure 23. <sup>1</sup>H NMR (500 MHz, CDCl<sub>3</sub>, 298K) of (2,3-diazido-2-methylpropoxy)benzene

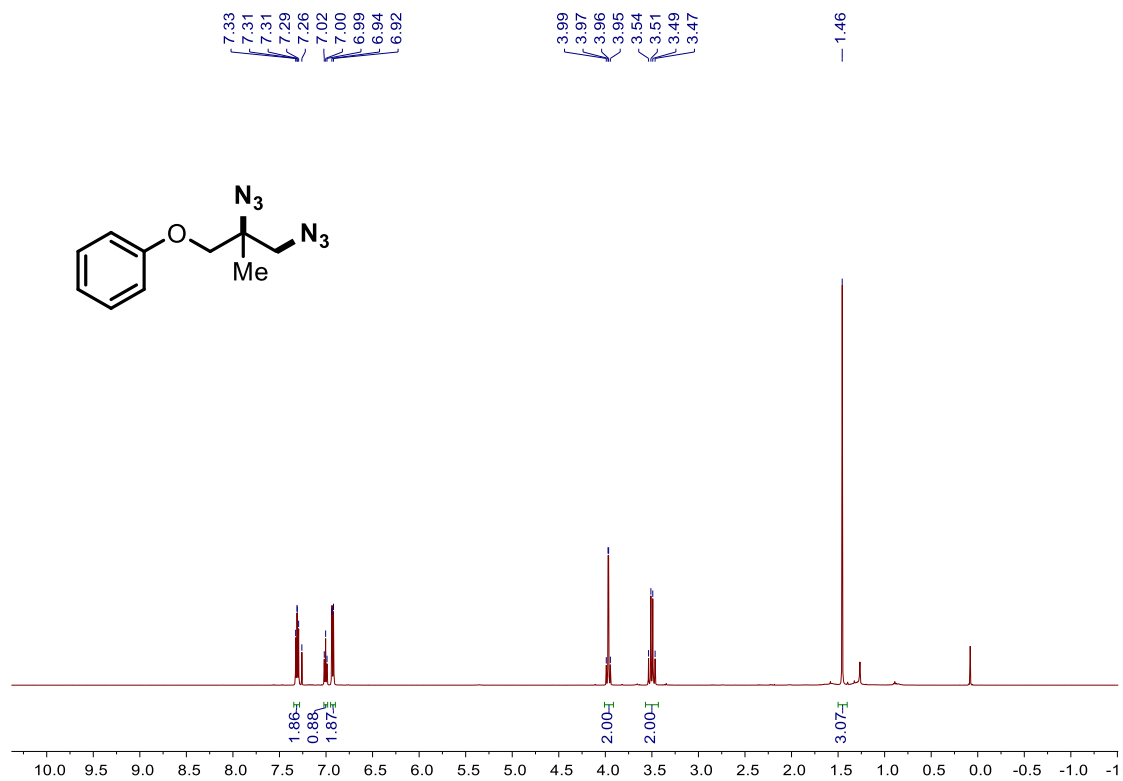

Supplementary Figure 24. <sup>13</sup>C NMR (101 MHz, CDCl<sub>3</sub>, 298K) of (2,3-diazido-2-methylpropoxy)benzene

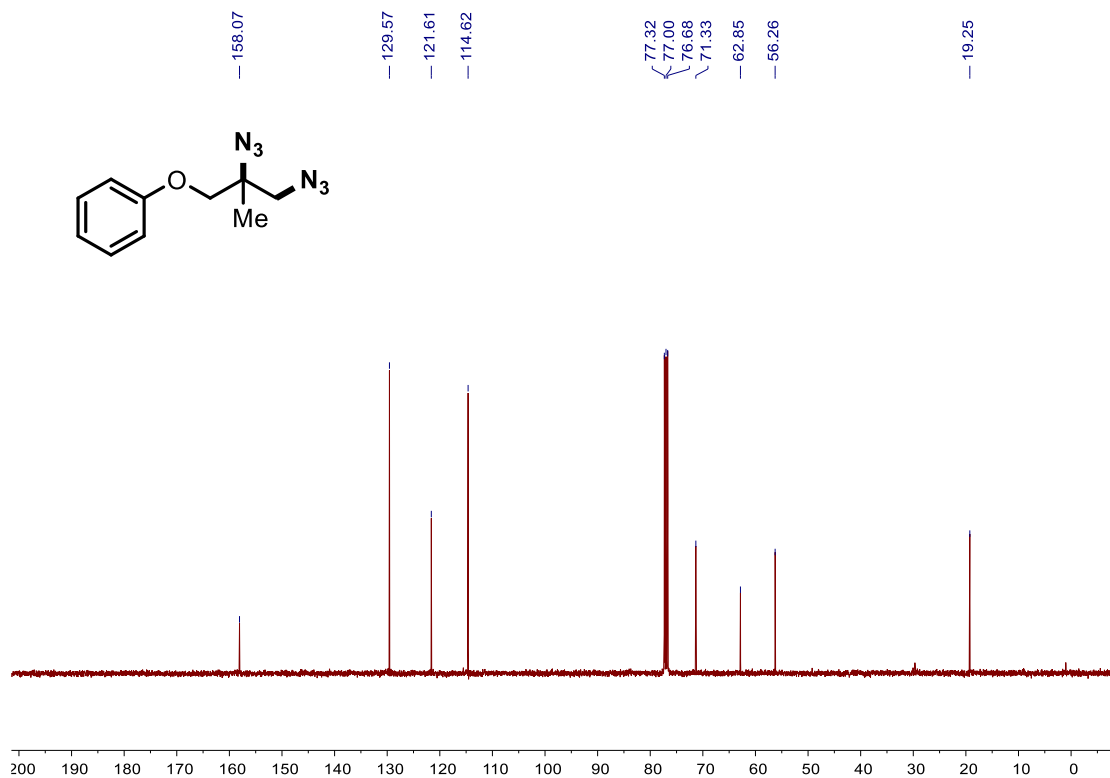



Supplementary Figure 25.  $^1\text{H}$  NMR (500 MHz,  $\text{CDCl}_3$ , 298K) of 1,2-diazido-2-methylheptane

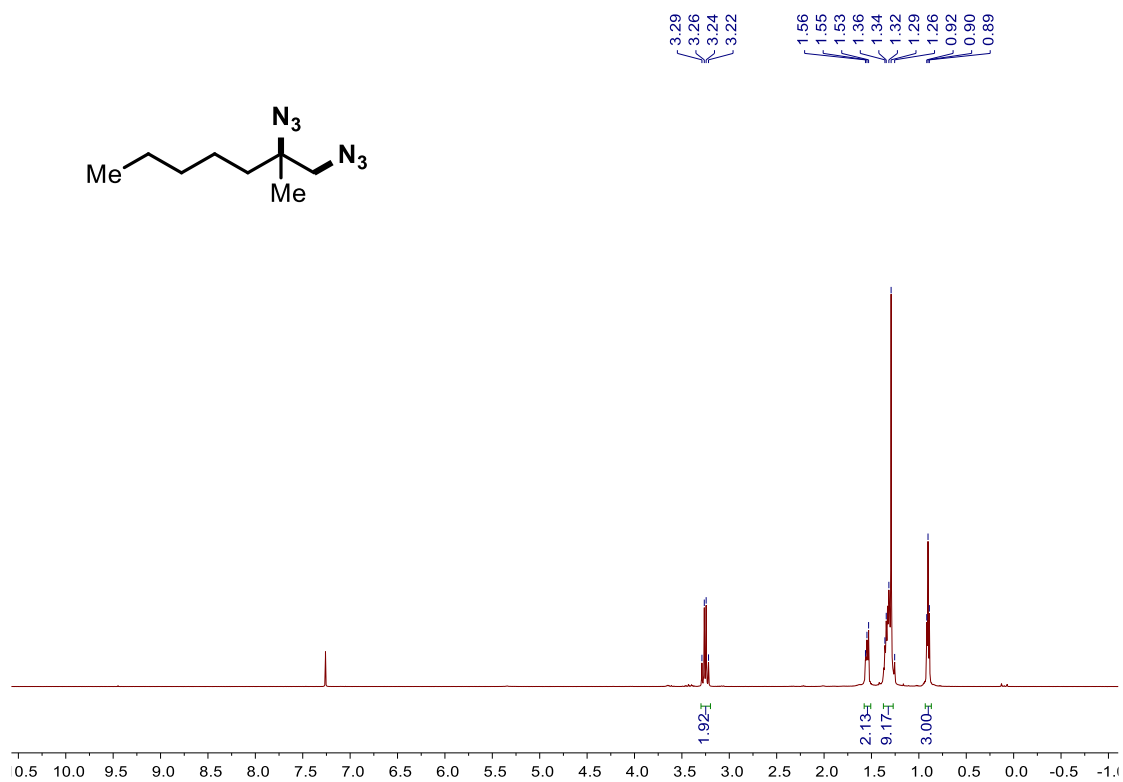

Supplementary Figure 26.  $^{13}\text{C}$  NMR (101 MHz,  $\text{CDCl}_3$ , 298K) of 1,2-diazido-2-methylheptane

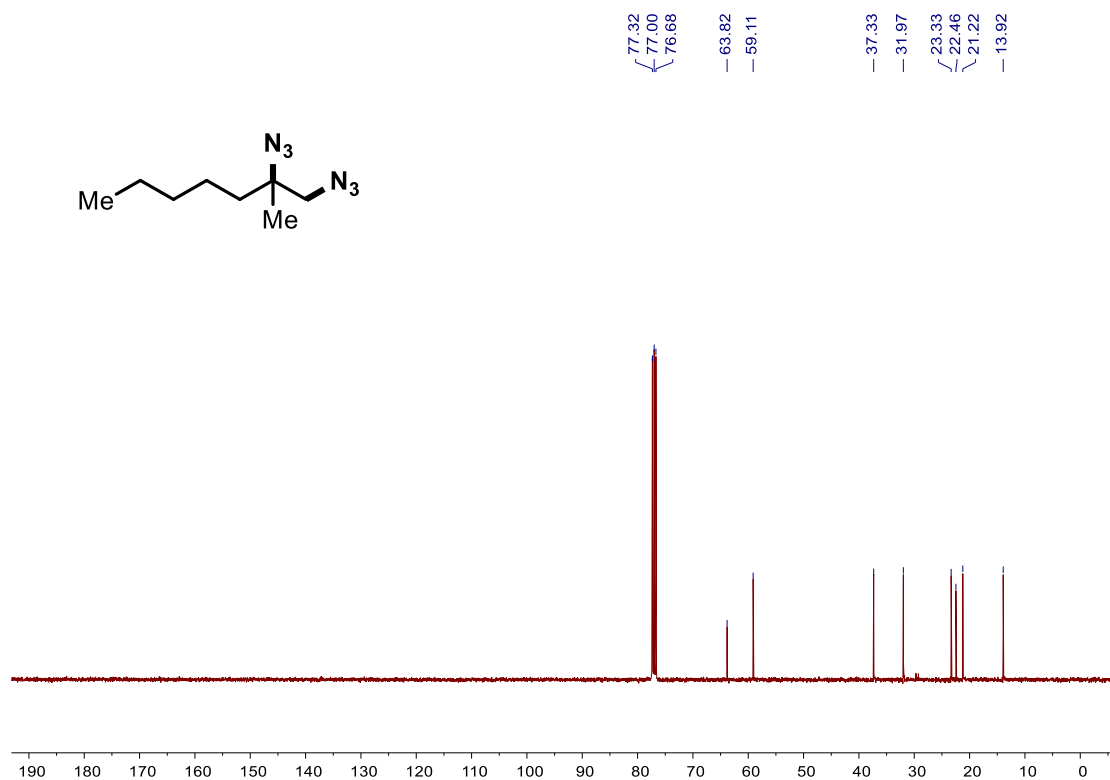

Supplementary Figure 27.  $^1\text{H}$  NMR (500 MHz,  $\text{CDCl}_3$ , 298K) of (3,4-diazidobutyl)benzene

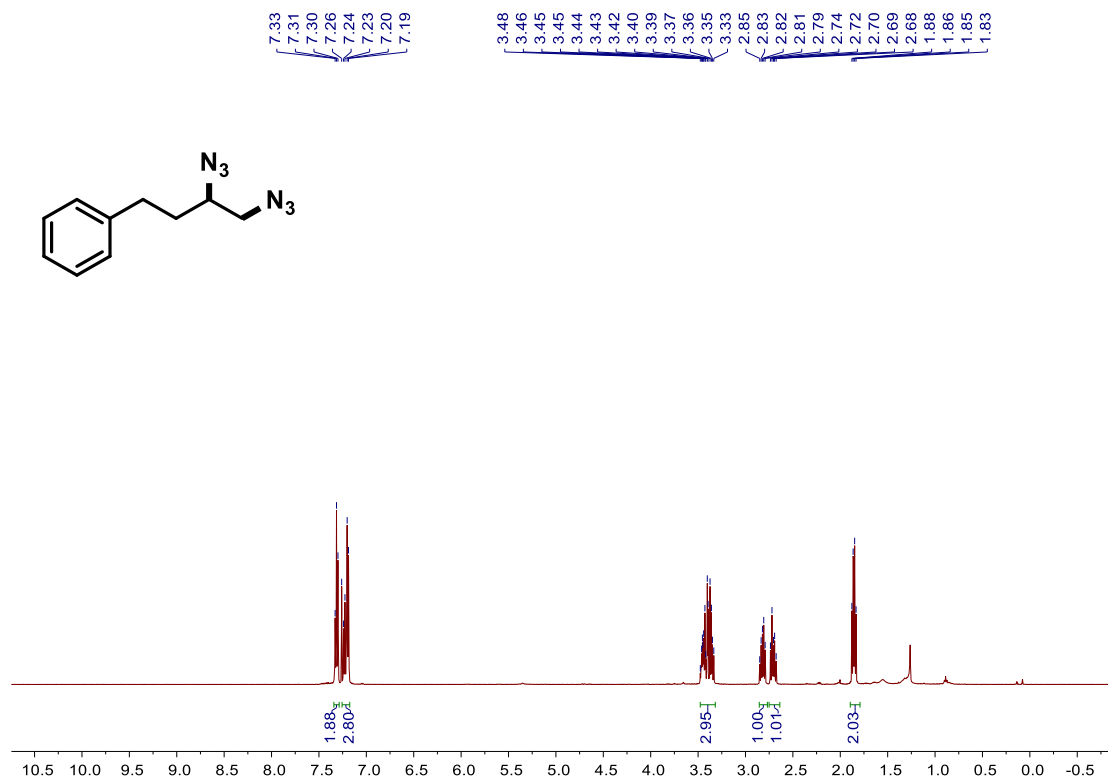

Supplementary Figure 28.  $^{13}\text{C}$  NMR (101 MHz,  $\text{CDCl}_3$ , 298K) of (3,4-diazidobutyl)benzene

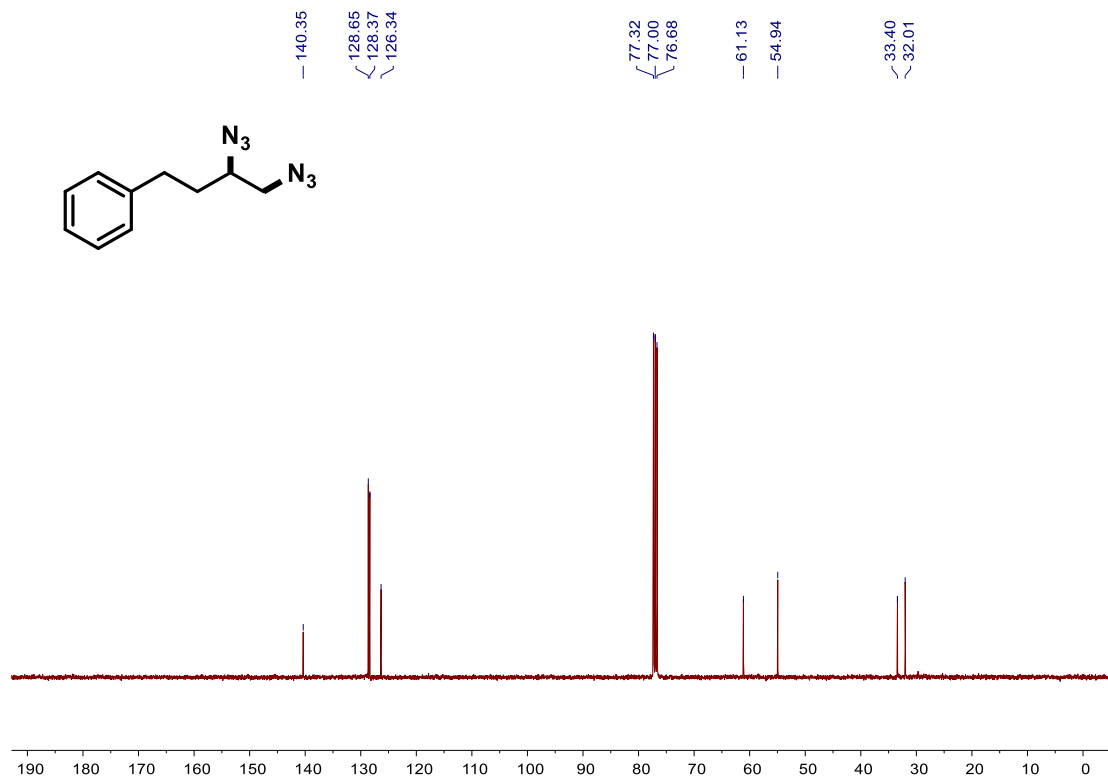

Supplementary Figure 29.  $^1\text{H}$  NMR (500 MHz,  $\text{CDCl}_3$ , 298K) of 1-(2,3-diazidopropyl)-4-fluorobenzene

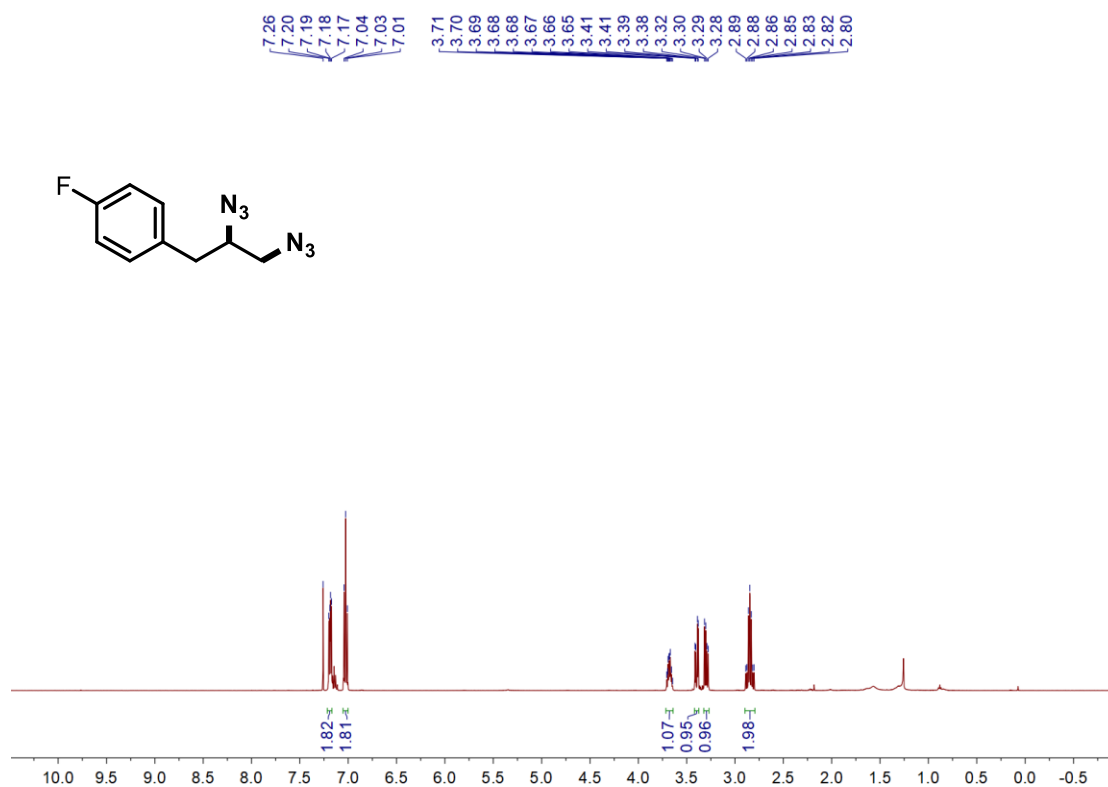

Supplementary Figure 30.  $^{13}\text{C}$  NMR (101 MHz,  $\text{CDCl}_3$ , 298K) of 1-(2,3-diazidopropyl)-4-fluorobenzene

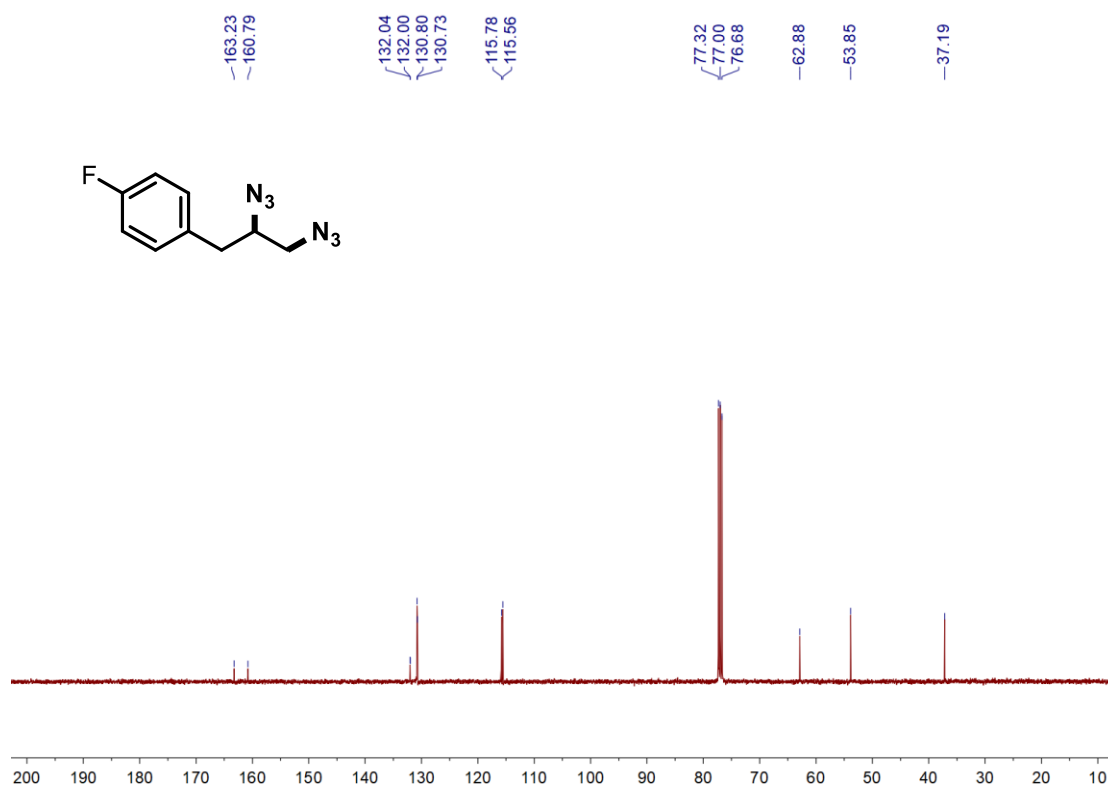

Supplementary Figure 31.  $^{19}\text{F}$  NMR (471 MHz,  $\text{CDCl}_3$ , 298K) of 1-(2,3-diazidopropyl)-4-fluorobenzene

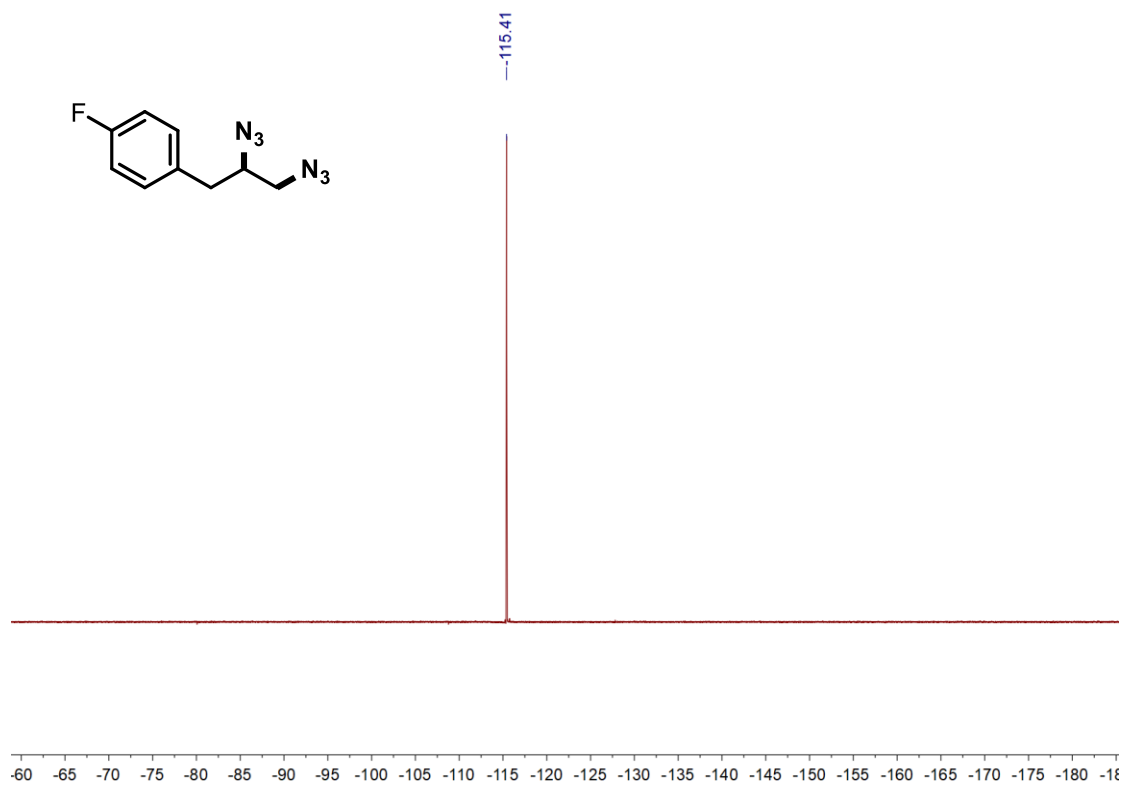

Supplementary Figure 32.  $^1\text{H}$  NMR (500 MHz,  $\text{CDCl}_3$ , 298K) of 1-(2,3-diazidopropyl)naphthalene

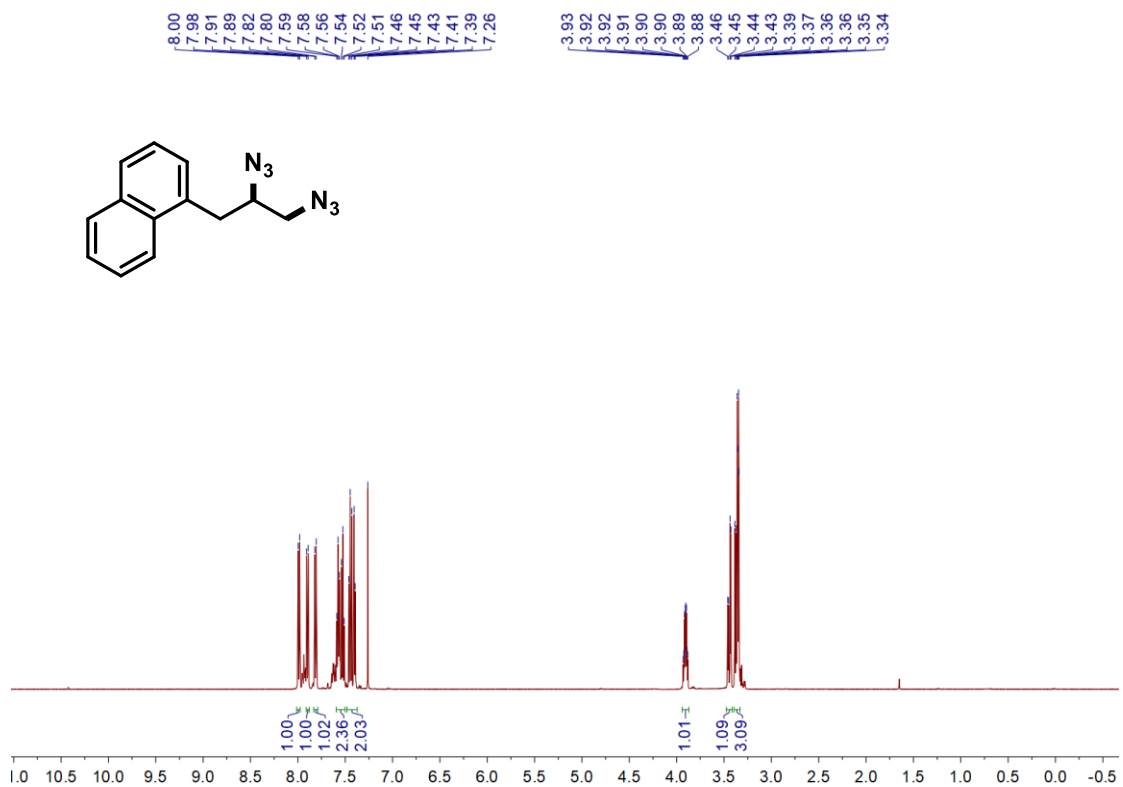

Supplementary Figure 33.  $^{13}\text{C}$  NMR (101 MHz,  $\text{CDCl}_3$ , 298K) of 1-(2,3-diazidopropyl)naphthalene

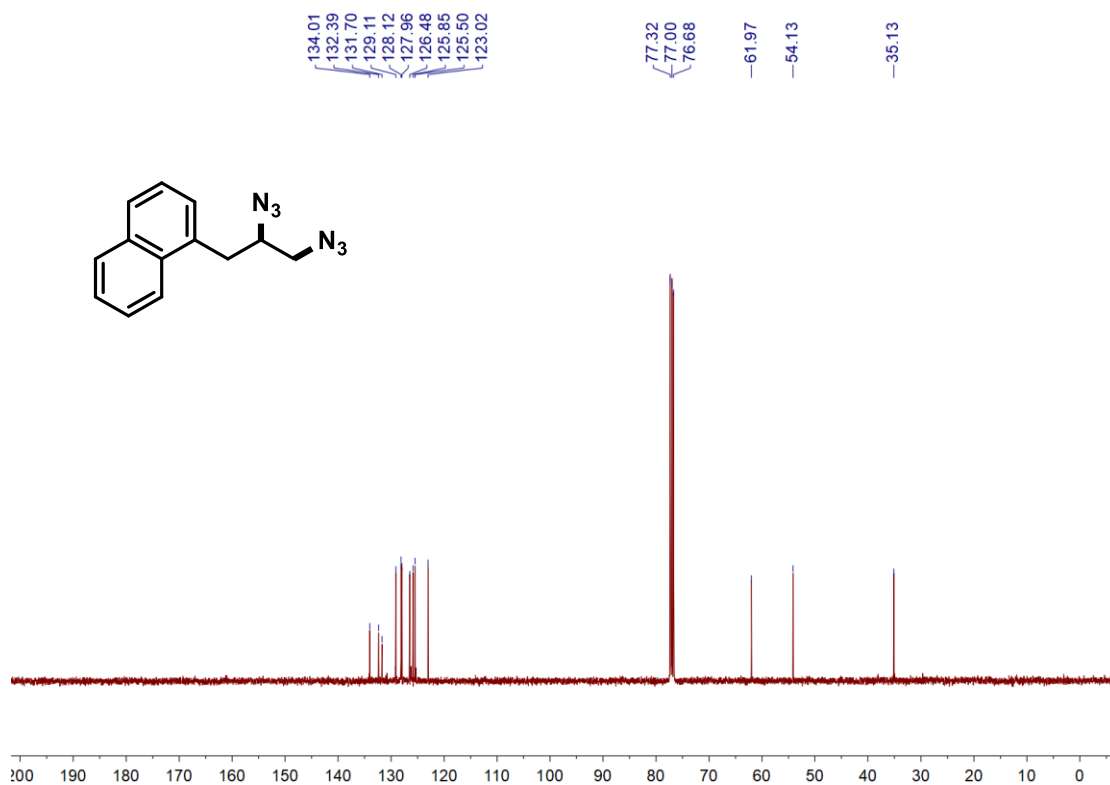

Supplementary Figure 34.  $^1\text{H}$  NMR (500 MHz,  $\text{CDCl}_3$ , 298K) of 2-(4,5-diazidopentyl)benzo[b]thiophene

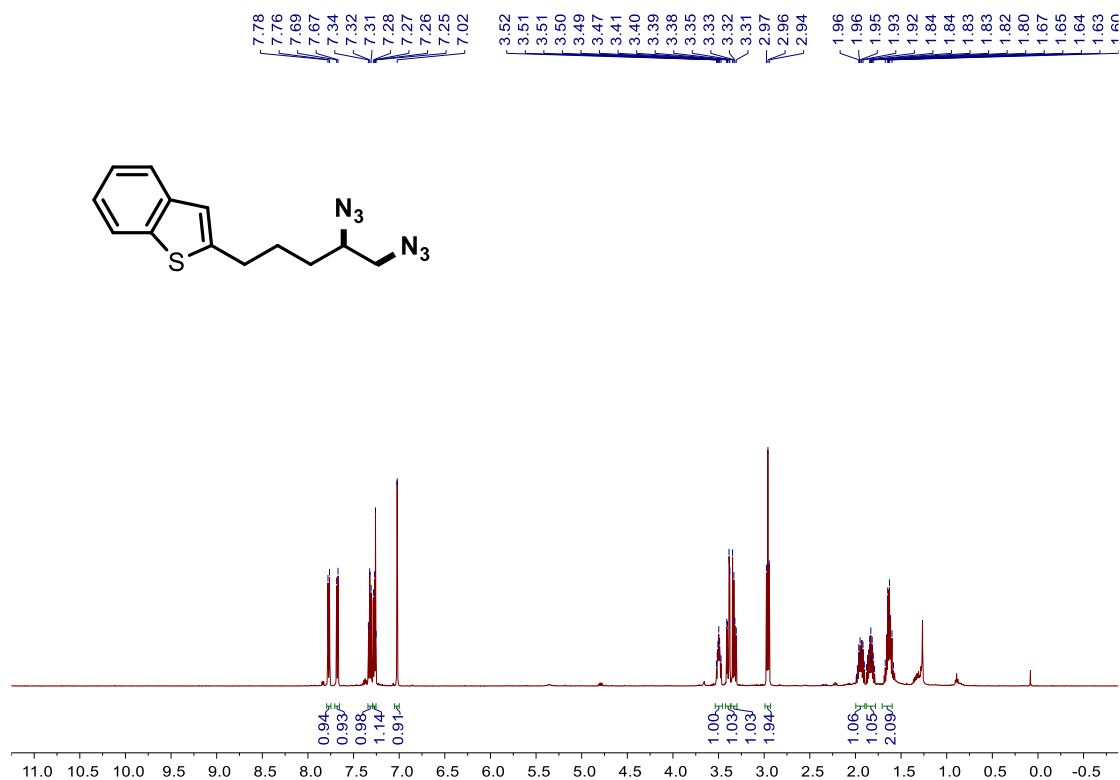

Supplementary Figure 35.  $^{13}\text{C}$  NMR (101 MHz,  $\text{CDCl}_3$ , 298K) of 2-(4,5-diazidopentyl)benzo[b]thiophene

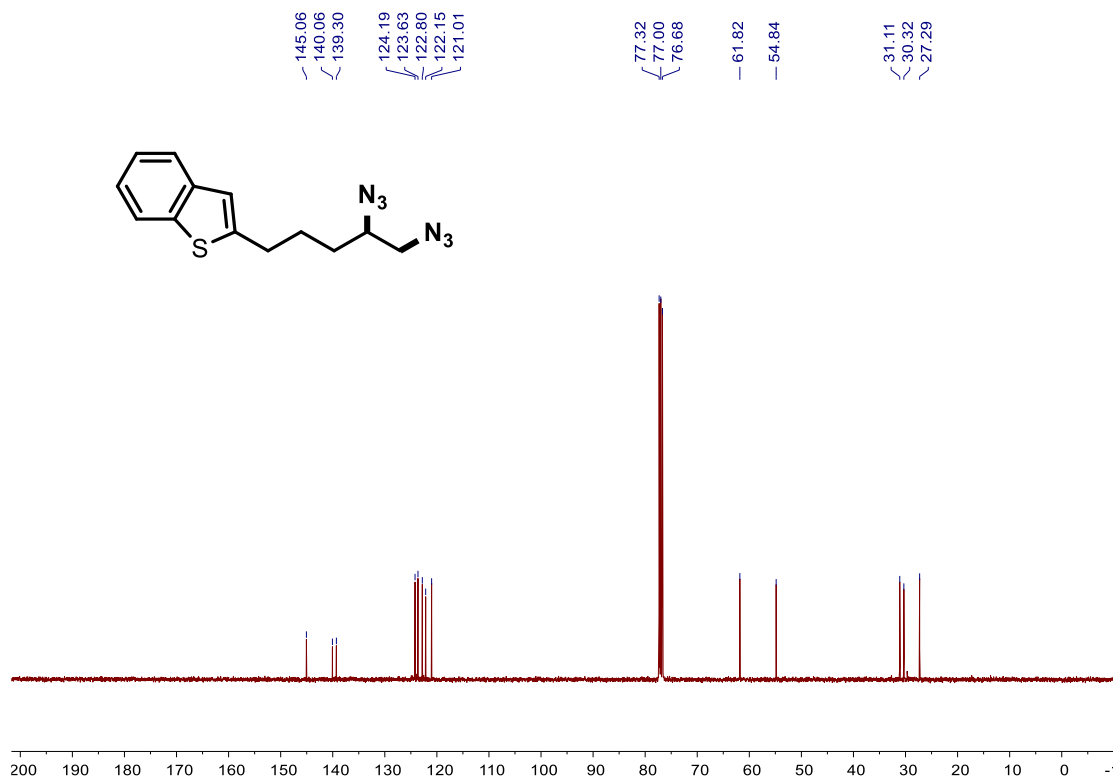

Supplementary Figure 36.  $^1\text{H}$  NMR (500 MHz,  $\text{CDCl}_3$ , 298K) of 1-(2,3-diazidopropyl)-2,3,4,5,6-pentafluorobenzene

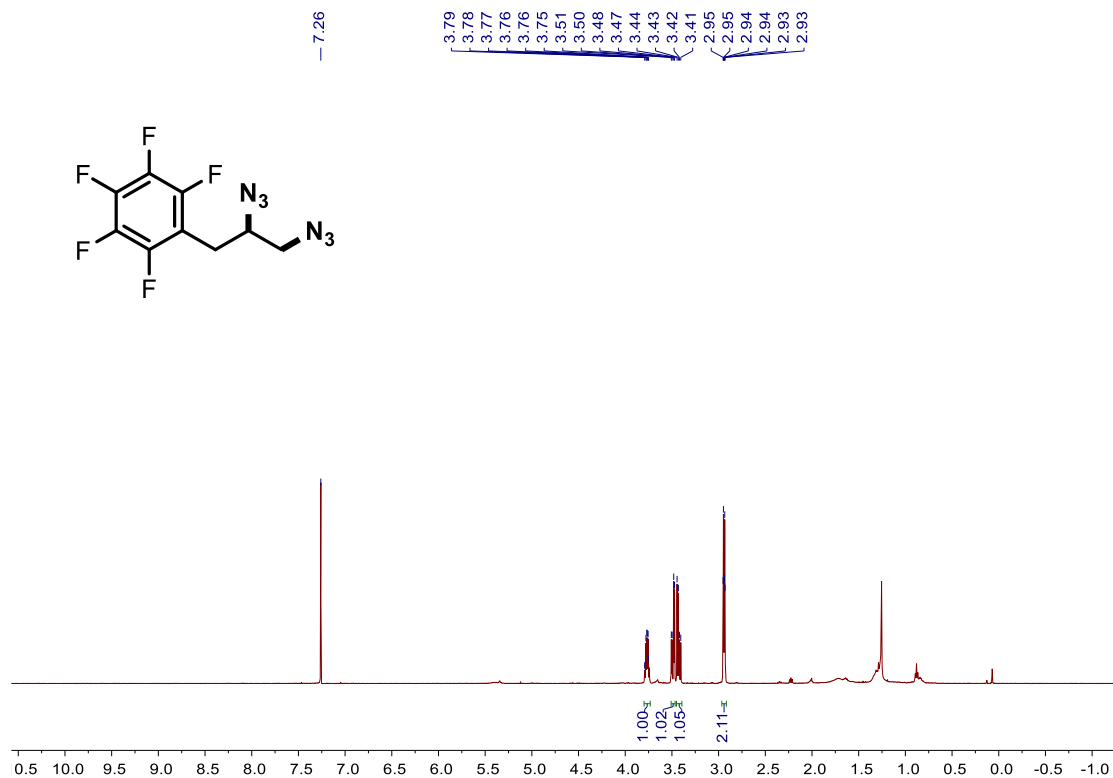

Supplementary Figure 37.  $^{13}\text{C}$  NMR (101 MHz,  $\text{CDCl}_3$ , 298K) of 1-(2,3-diazidopropyl)-2,3,4,5,6-pentafluorobenzene

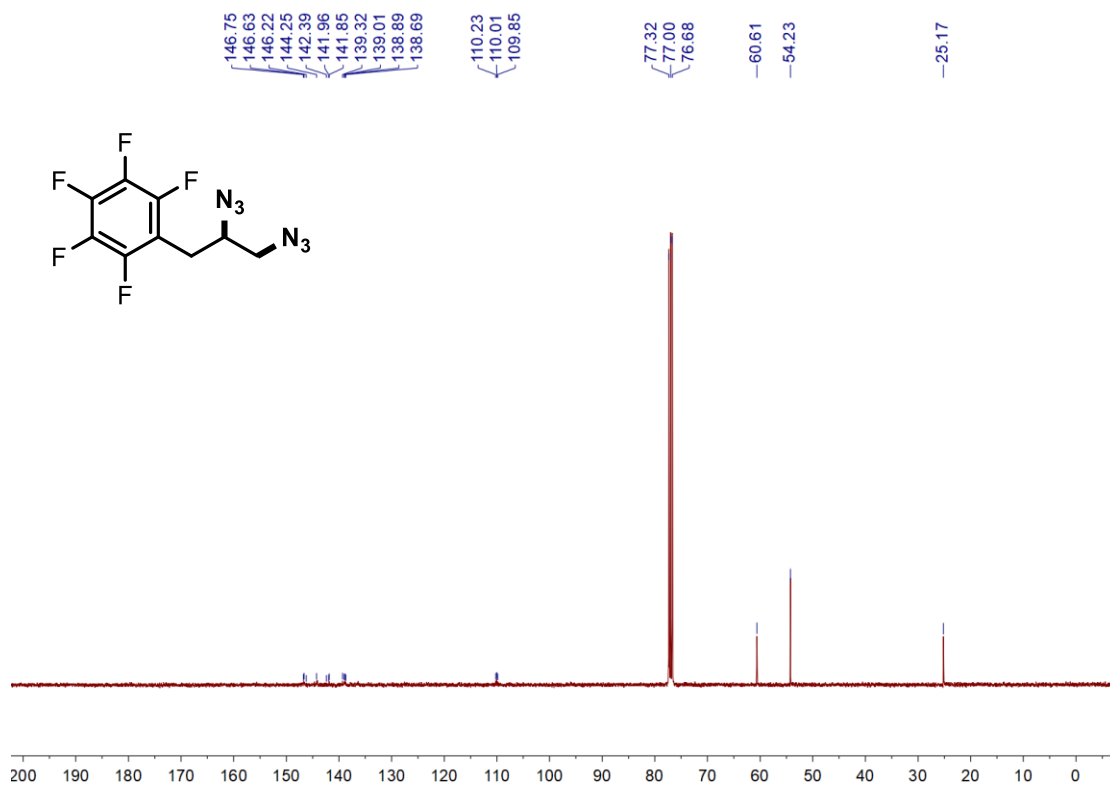

Supplementary Figure 38.  $^{19}\text{F}$  NMR (471 MHz,  $\text{CDCl}_3$ , 298K) of 1-(2,3-diazidopropyl)-2,3,4,5,6-pentafluorobenzene

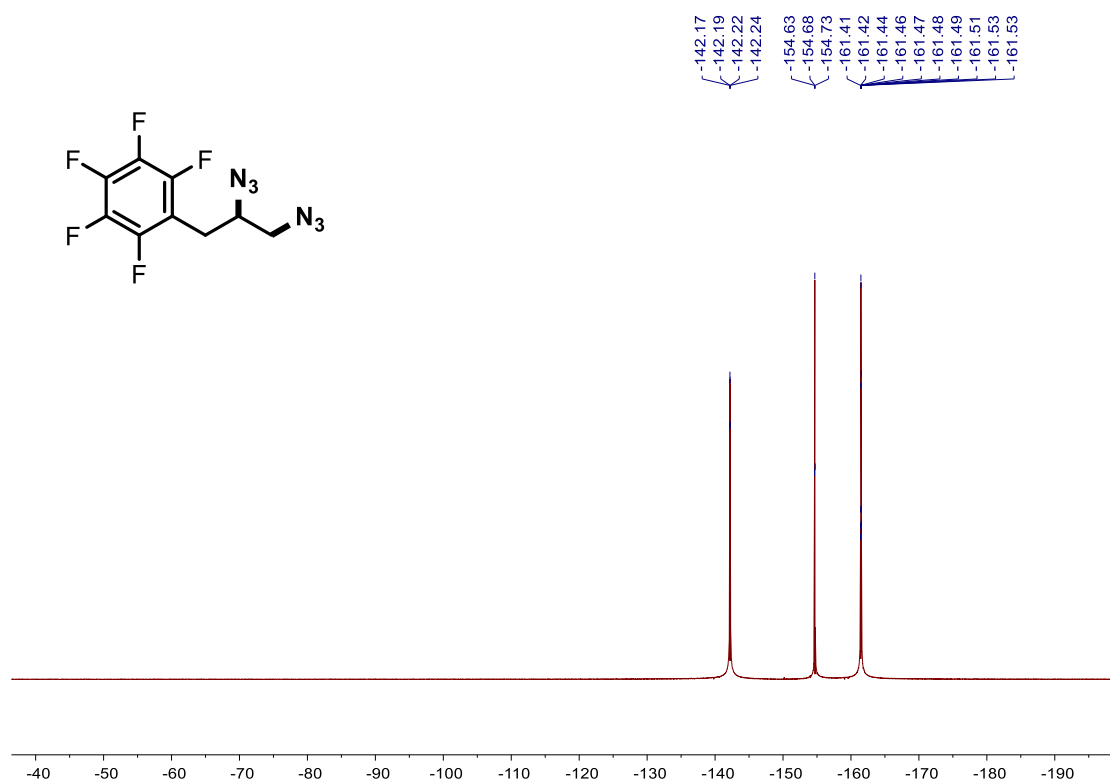

**Supplementary Figure 39.  $^1\text{H}$  NMR (500 MHz,  $\text{CDCl}_3$ , 298K) of 1,2-diazido-6-chlorohexane**

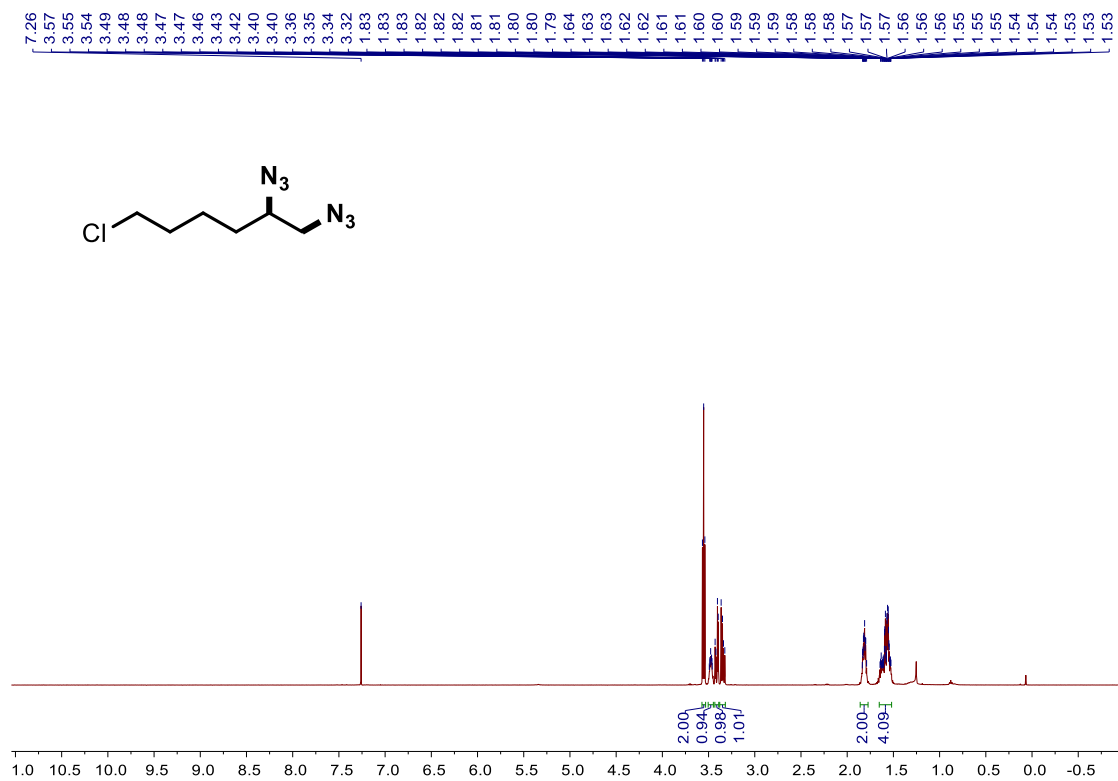

**Supplementary Figure 40.  $^{13}\text{C}$  NMR (101 MHz,  $\text{CDCl}_3$ , 298K) of 1,2-diazido-6-chlorohexane**

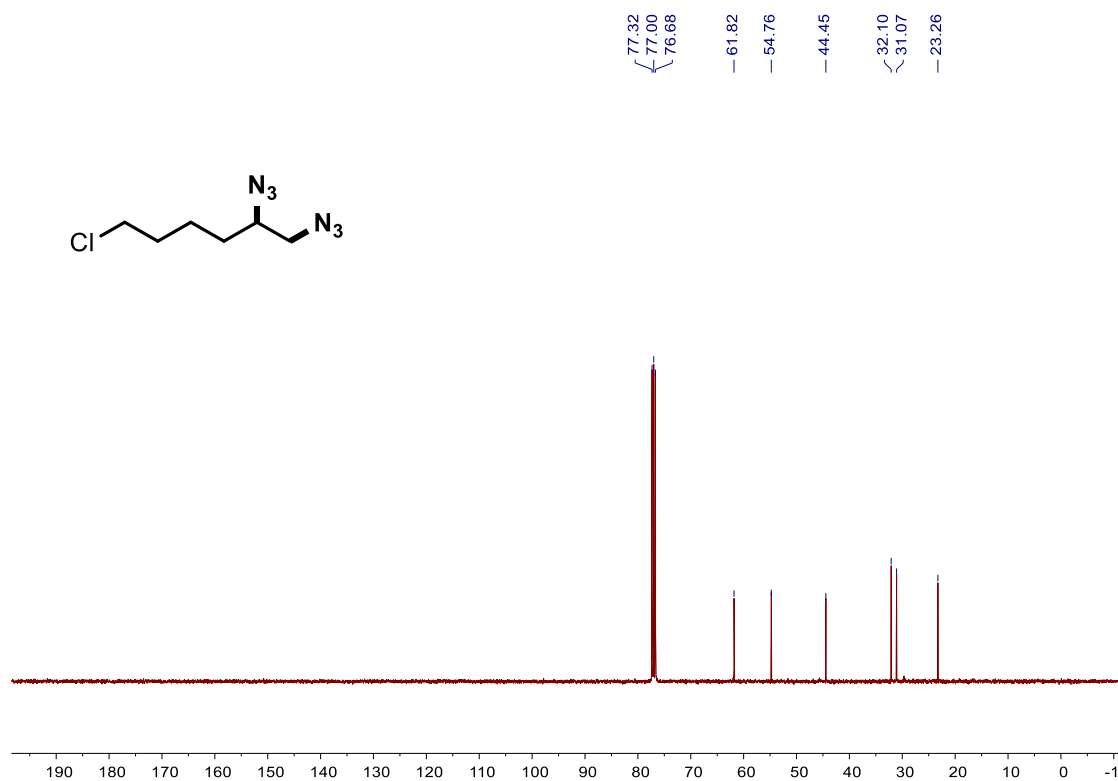



**Supplementary Figure 41.  $^1\text{H}$  NMR (500 MHz,  $\text{CDCl}_3$ , 298K) of 1,2-diazido-8-bromooctane**

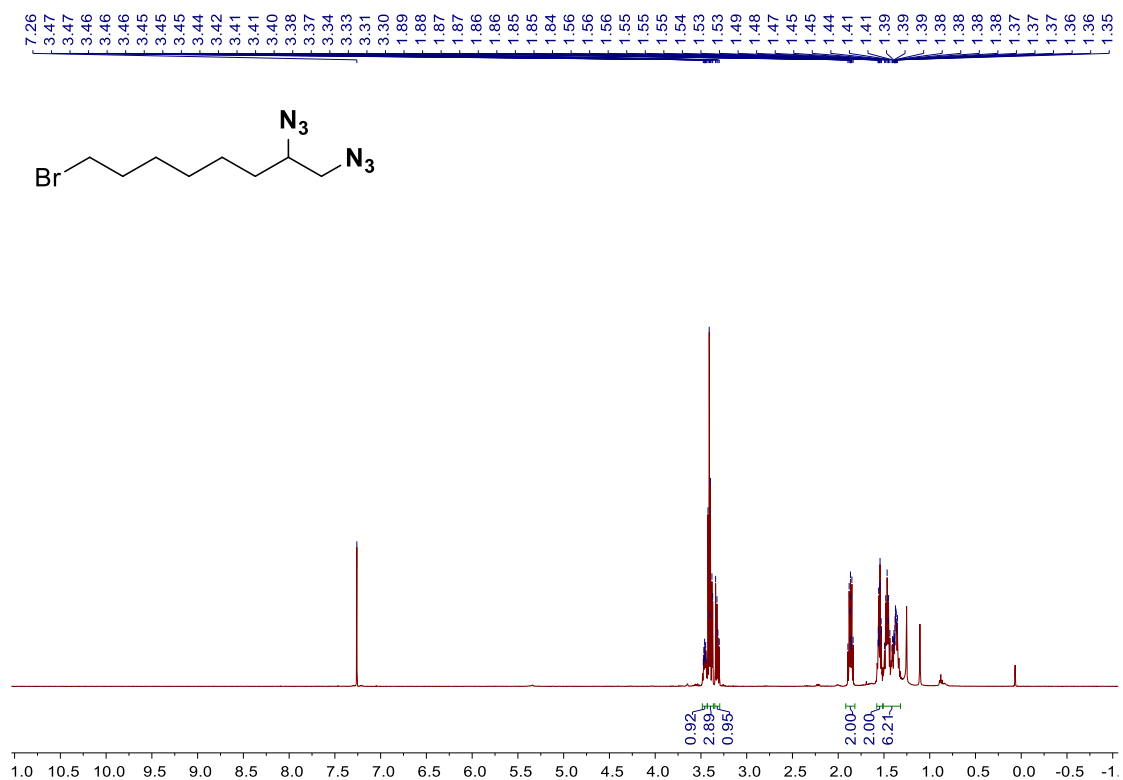

**Supplementary Figure 42.  $^{13}\text{C}$  NMR (101 MHz,  $\text{CDCl}_3$ , 298K) of 1,2-diazido-8-bromooctane**

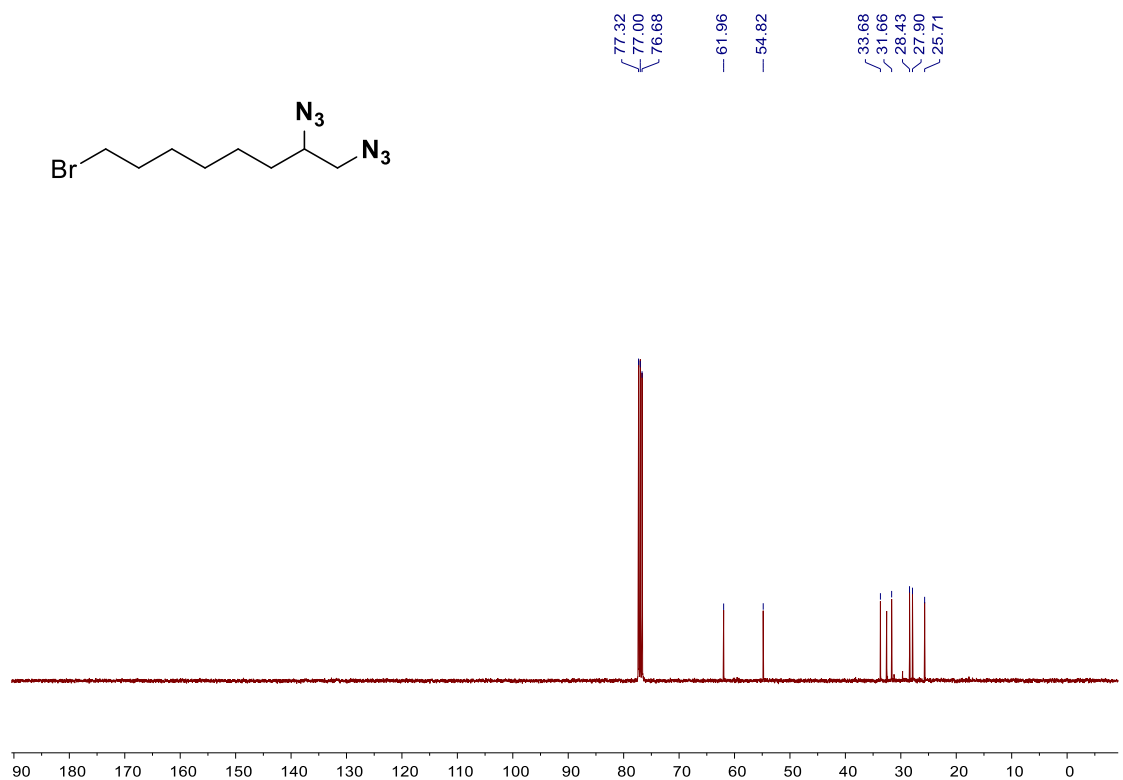

Supplementary Figure 43.  $^1\text{H}$  NMR (500 MHz,  $\text{CDCl}_3$ , 298K) of 5,6-diazohehexan-1-ol

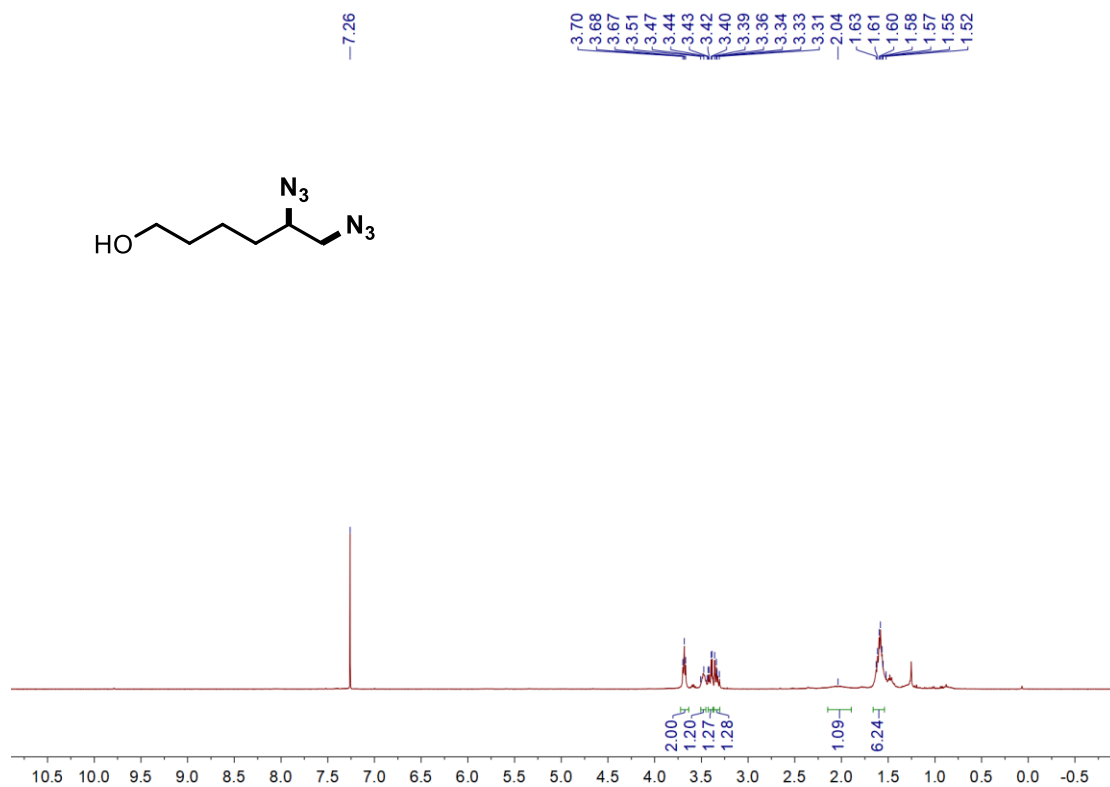

Supplementary Figure 44.  $^{13}\text{C}$  NMR (101 MHz,  $\text{CDCl}_3$ , 298K) of 5,6-diazohehexan-1-ol

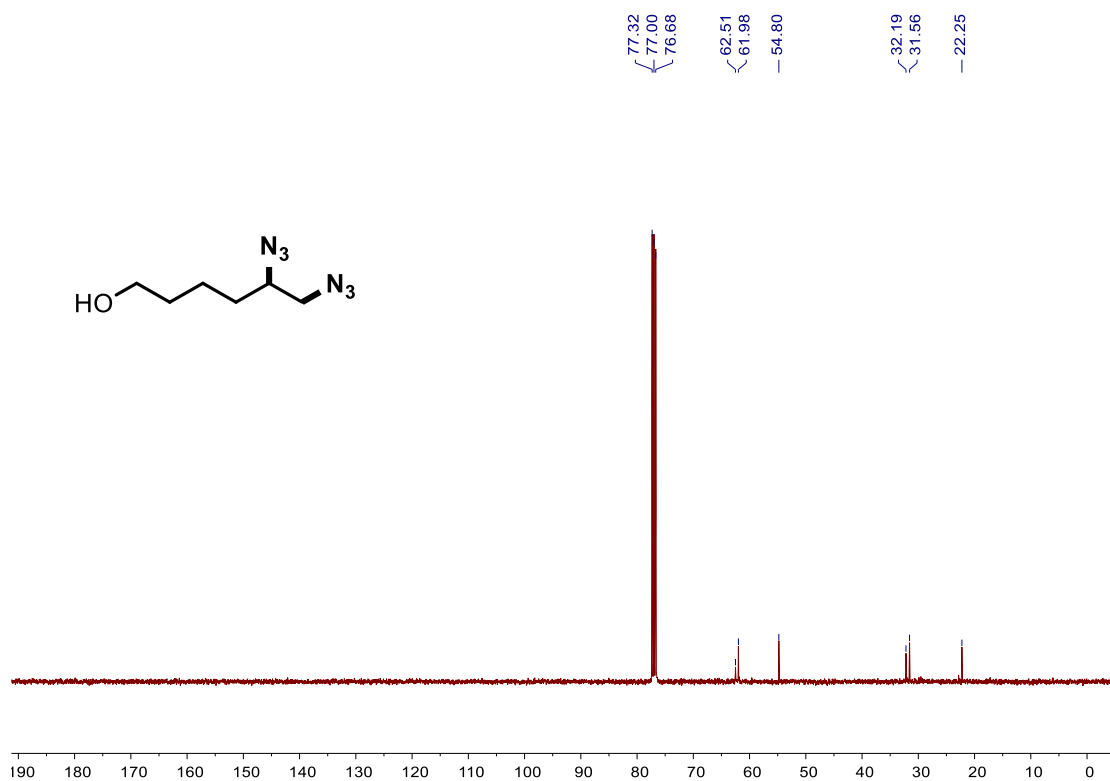

Supplementary Figure 45.  $^1\text{H}$  NMR (500 MHz,  $\text{CDCl}_3$ , 298K) of 2-(2,3-diazidopropyl)isoindoline-1,3-dione

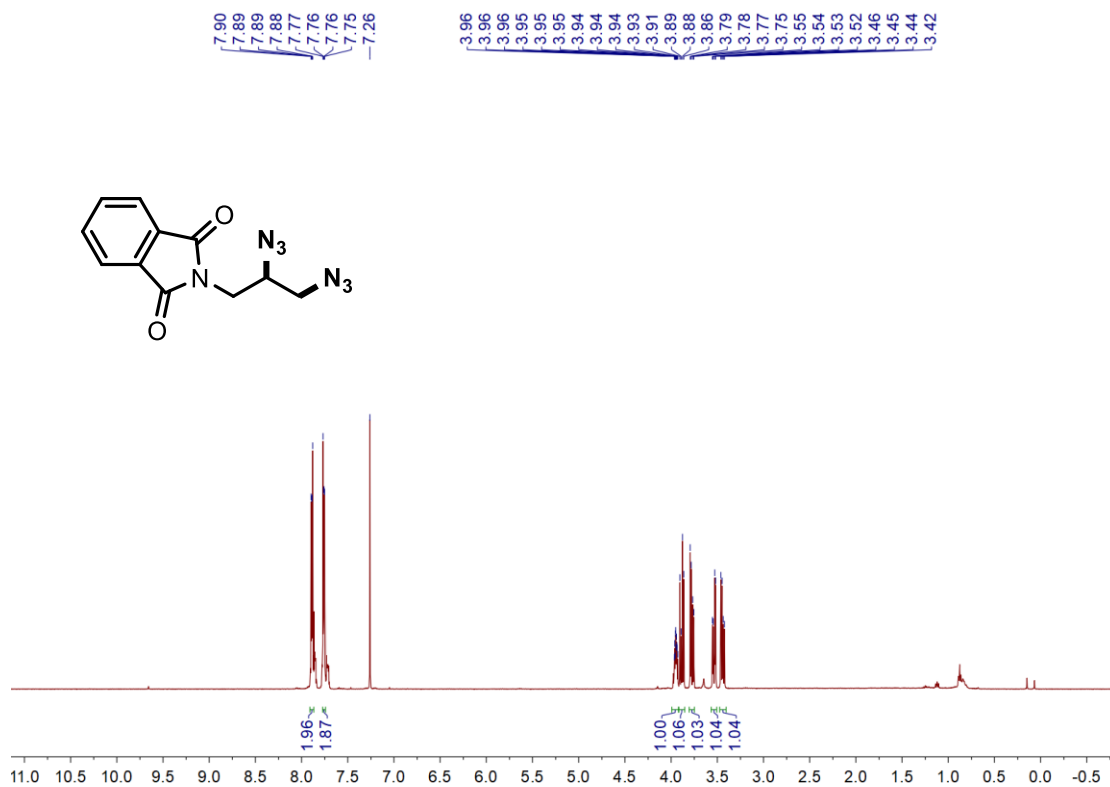

Supplementary Figure 46.  $^{13}\text{C}$  NMR (101 MHz,  $\text{CDCl}_3$ , 298K) of 2-(2,3-diazidopropyl)isoindoline-1,3-dione

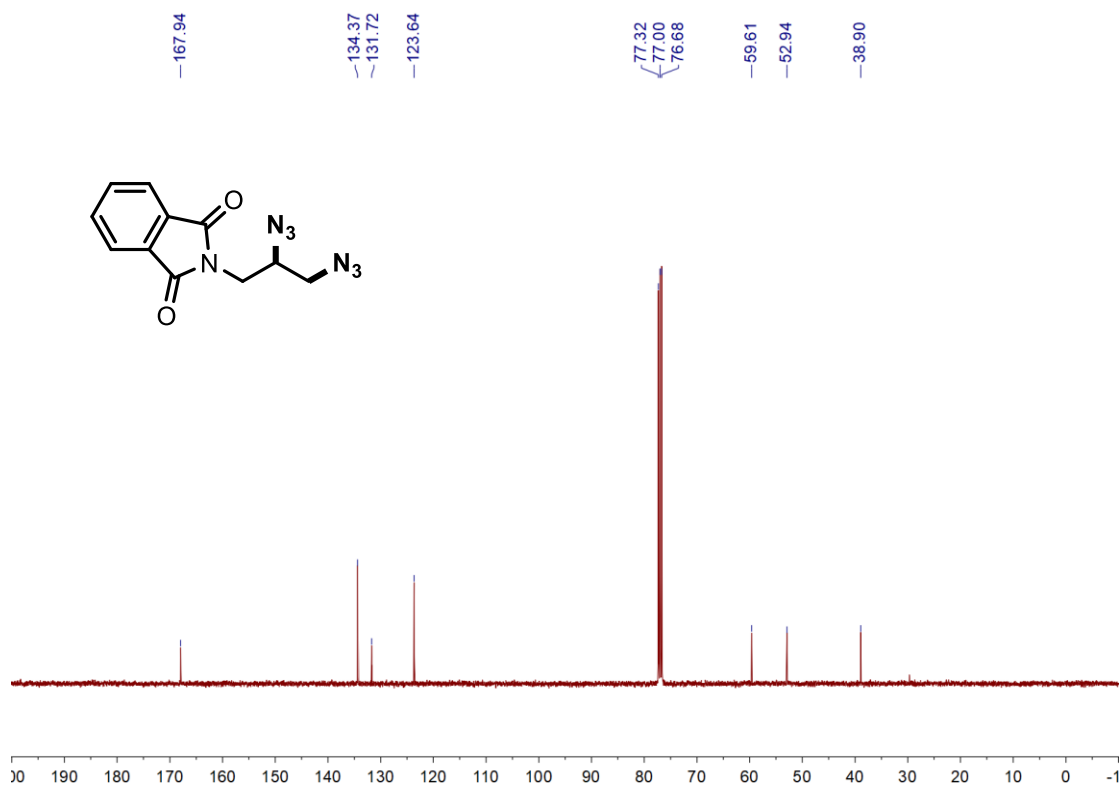

Supplementary Figure 47. <sup>1</sup>H NMR (500 MHz, CDCl<sub>3</sub>, 298K) of 4,5-diazido-N-phenylpentanamide

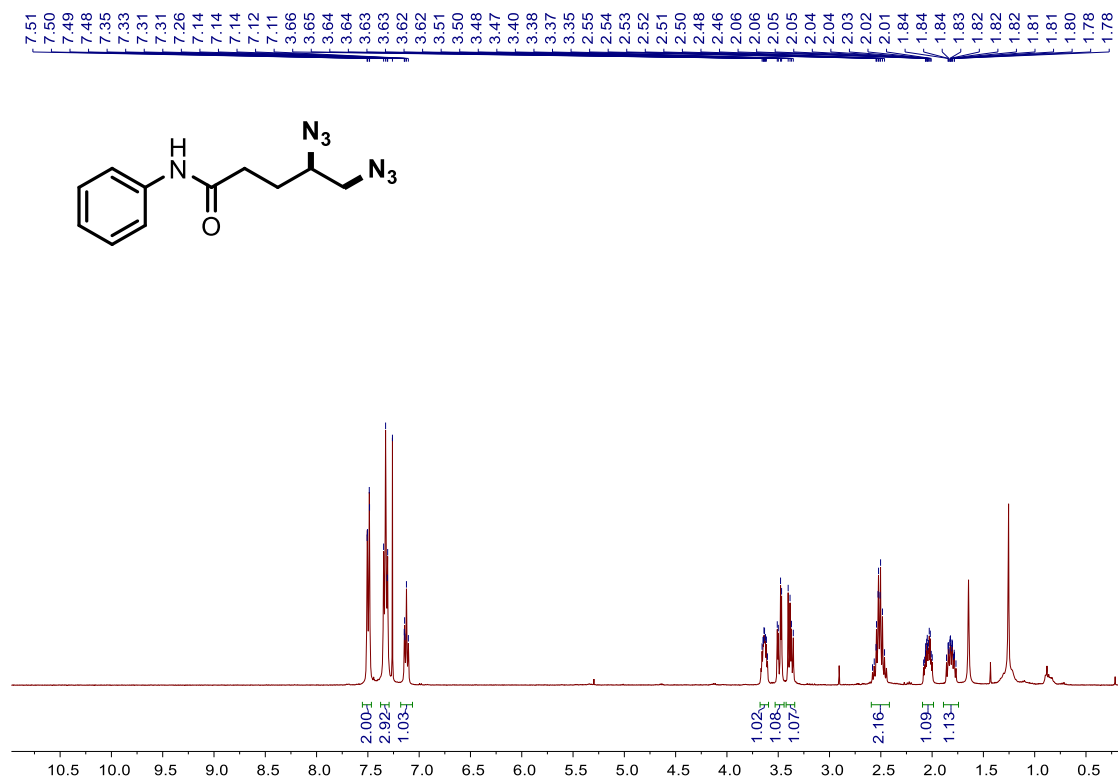

Supplementary Figure 48. <sup>13</sup>C NMR (126 MHz, CDCl<sub>3</sub>, 298K) of 4,5-diazido-N-phenylpentanamide

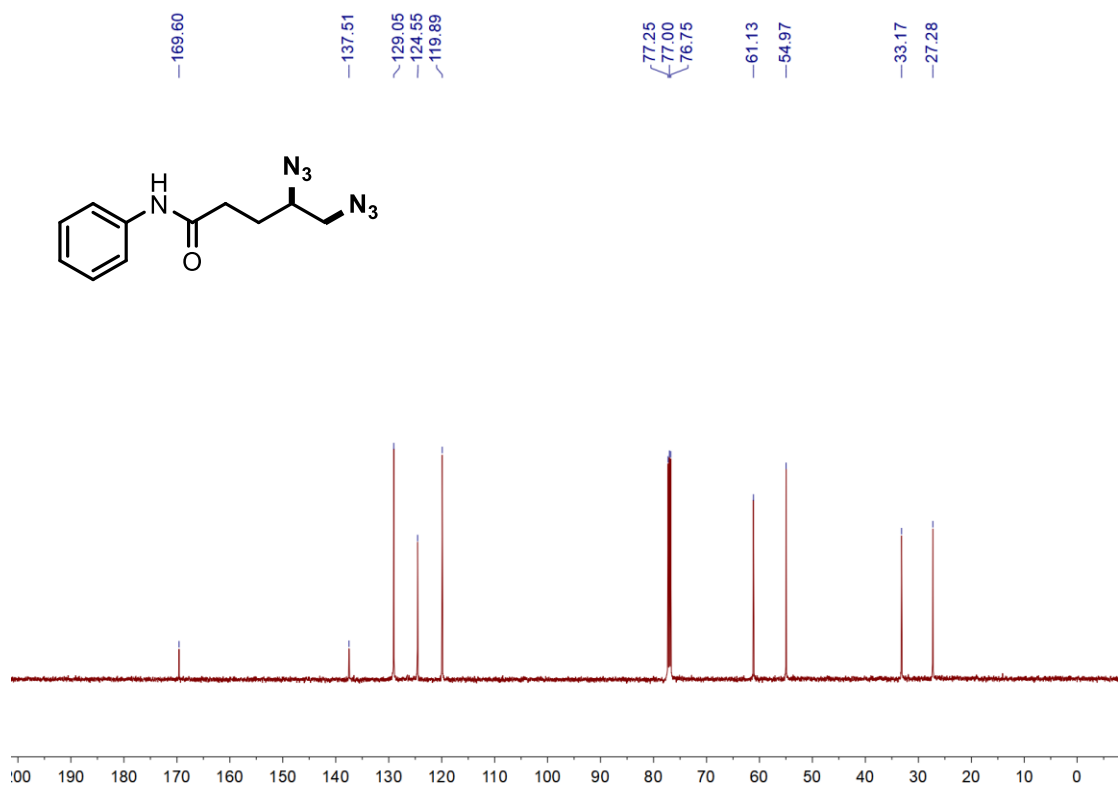

**Supplementary Figure 49. <sup>1</sup>H NMR (500 MHz, CDCl<sub>3</sub>, 298K) of S-phenyl-4,5-diazidopentanethioate**

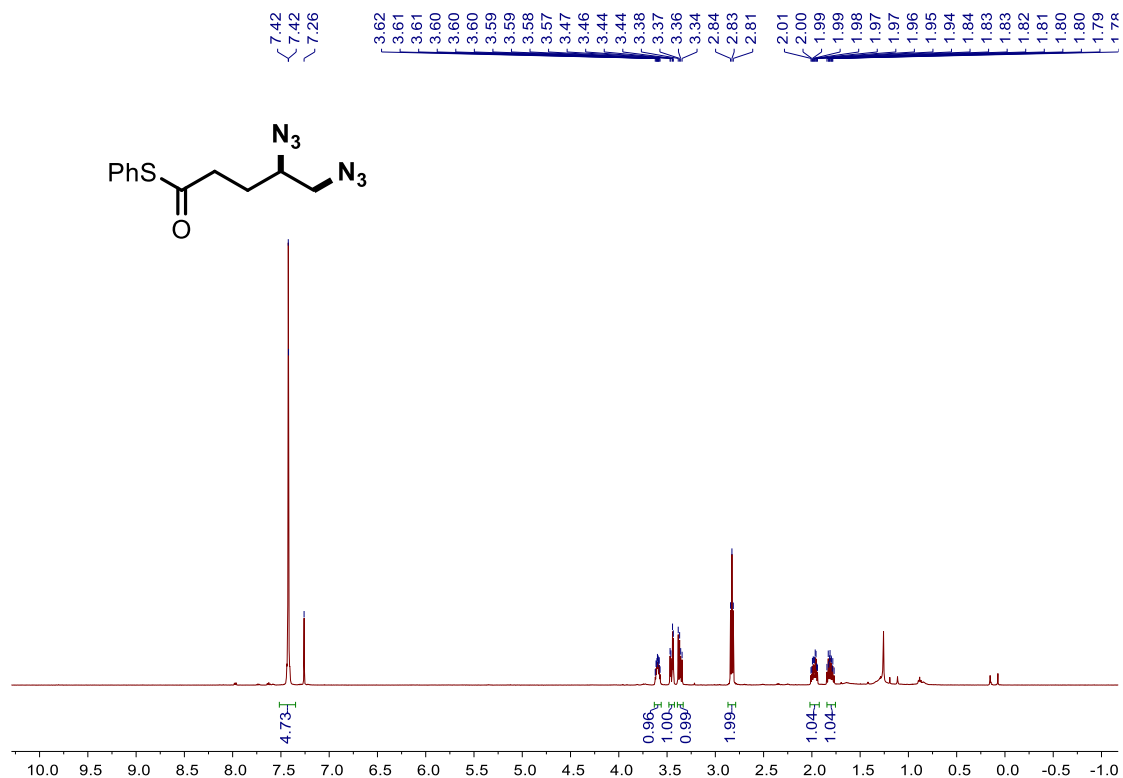

**Supplementary Figure 50. <sup>13</sup>C NMR (101 MHz, CDCl<sub>3</sub>, 298K) of S-phenyl-4,5-diazidopentanethioate**

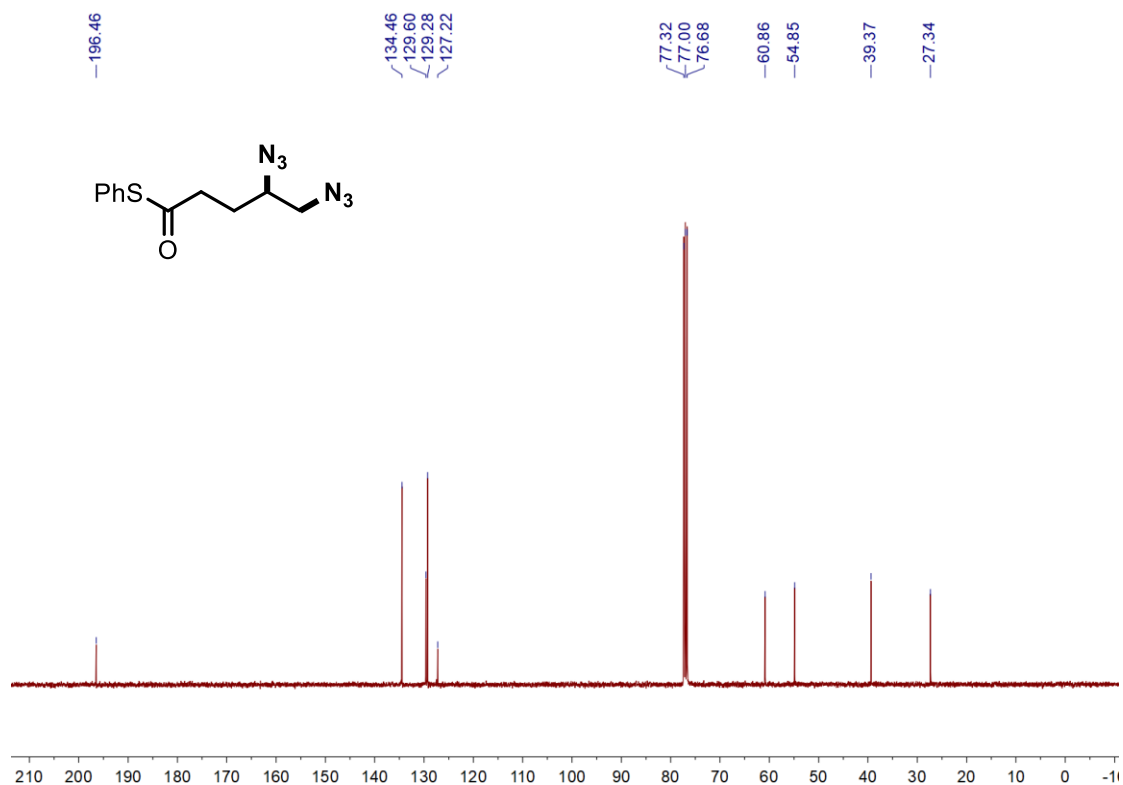

Supplementary Figure 51.  $^1\text{H}$  NMR (500 MHz,  $\text{CDCl}_3$ , 298K) of (2,3-diazidopropyl)dimethyl(phenyl)silane

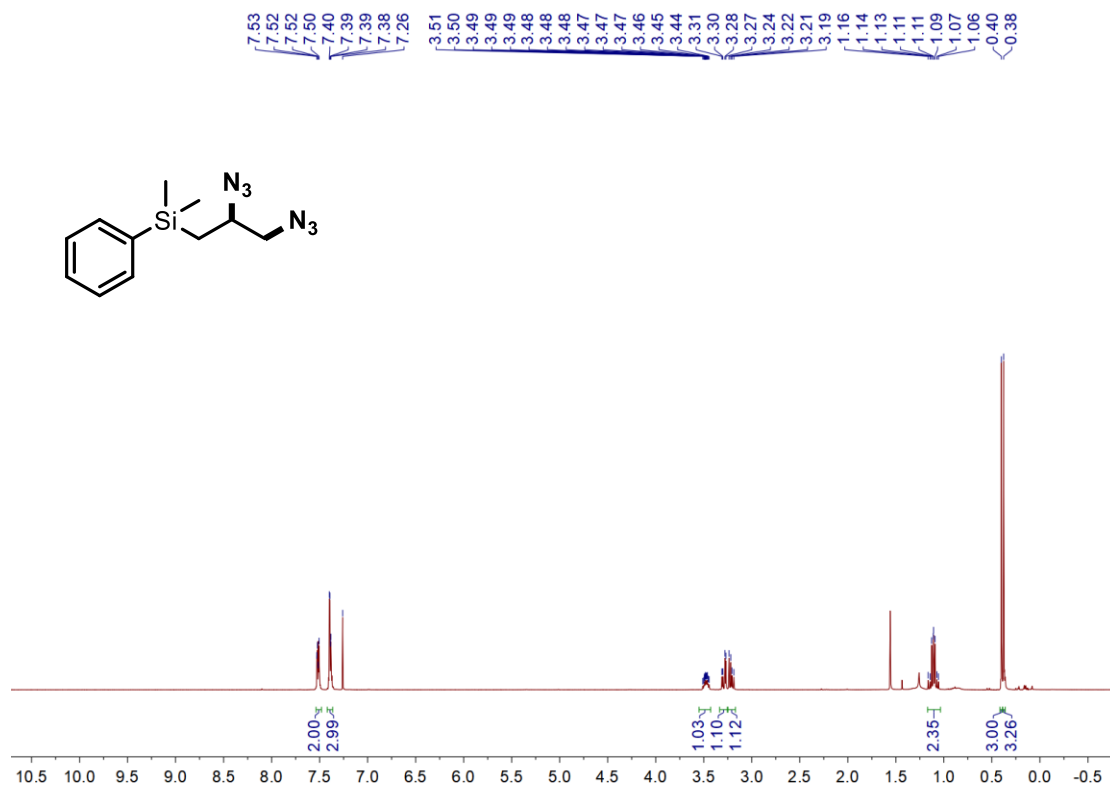

Supplementary Figure 52.  $^{13}\text{C}$  NMR (126 MHz,  $\text{CDCl}_3$ , 298K) of (2,3-diazidopropyl)dimethyl(phenyl)silane

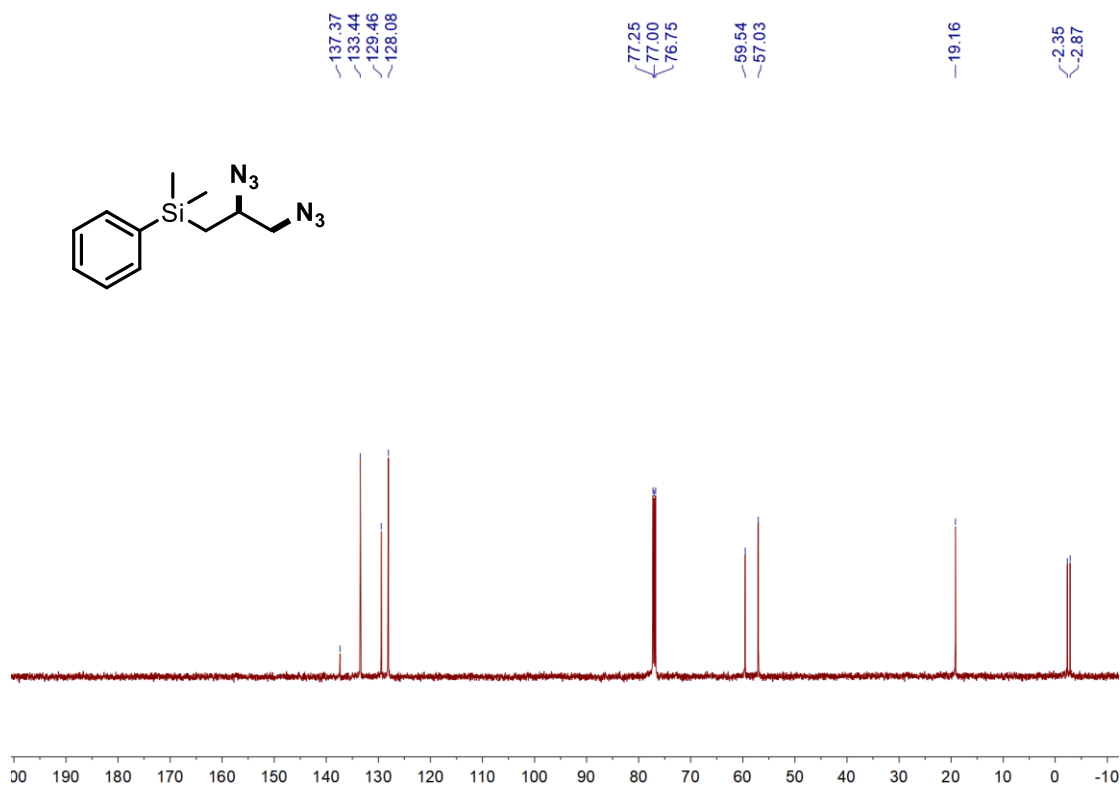

Supplementary Figure 53.  $^1\text{H}$  NMR (500 MHz,  $\text{CDCl}_3$ , 298K) of 4,5-diazidooctane

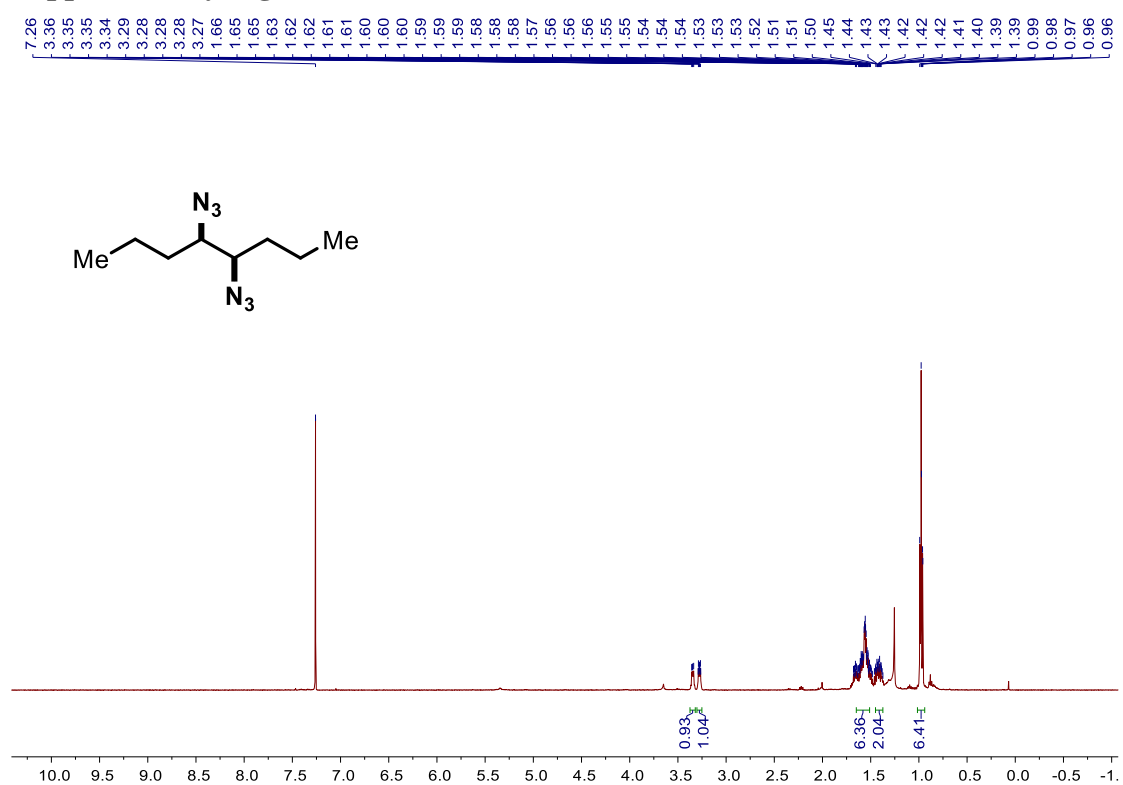

Supplementary Figure 54.  $^{13}\text{C}$  NMR (101 MHz,  $\text{CDCl}_3$ , 298K) of 4,5-diazidooctane

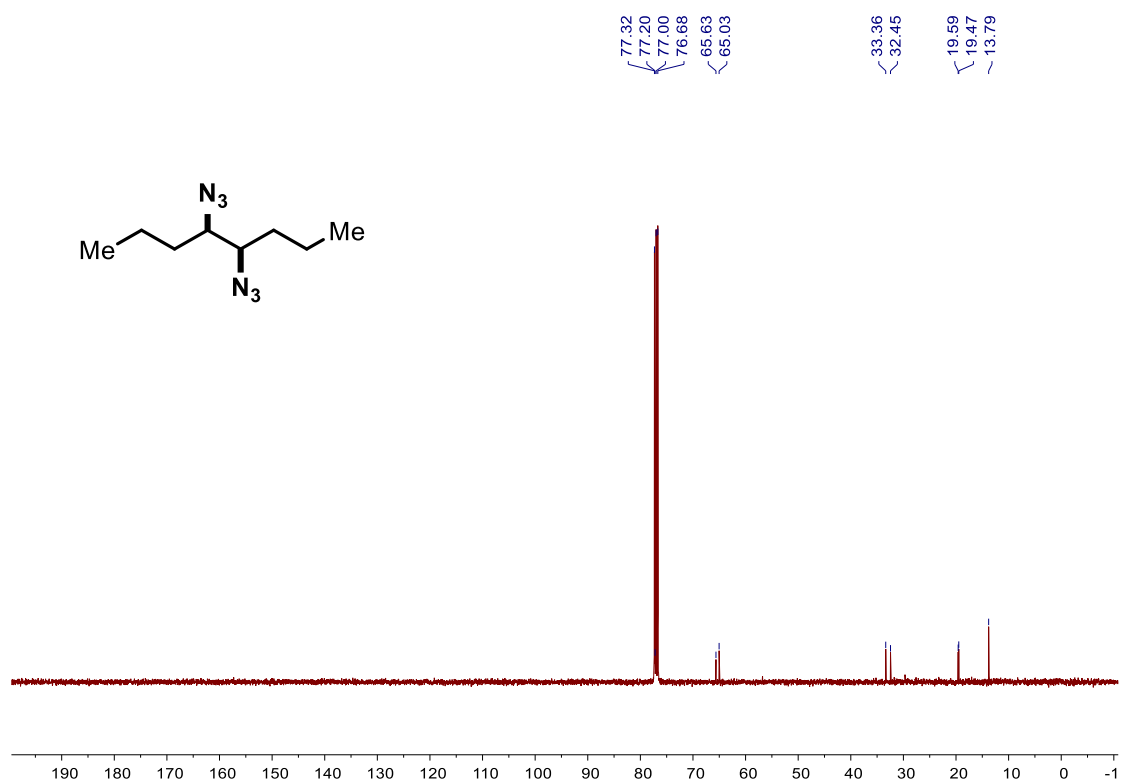

Supplementary Figure 55.  $^1\text{H}$  NMR (500 MHz,  $\text{CDCl}_3$ , 298K) of 1,2-diazidocyclooctane

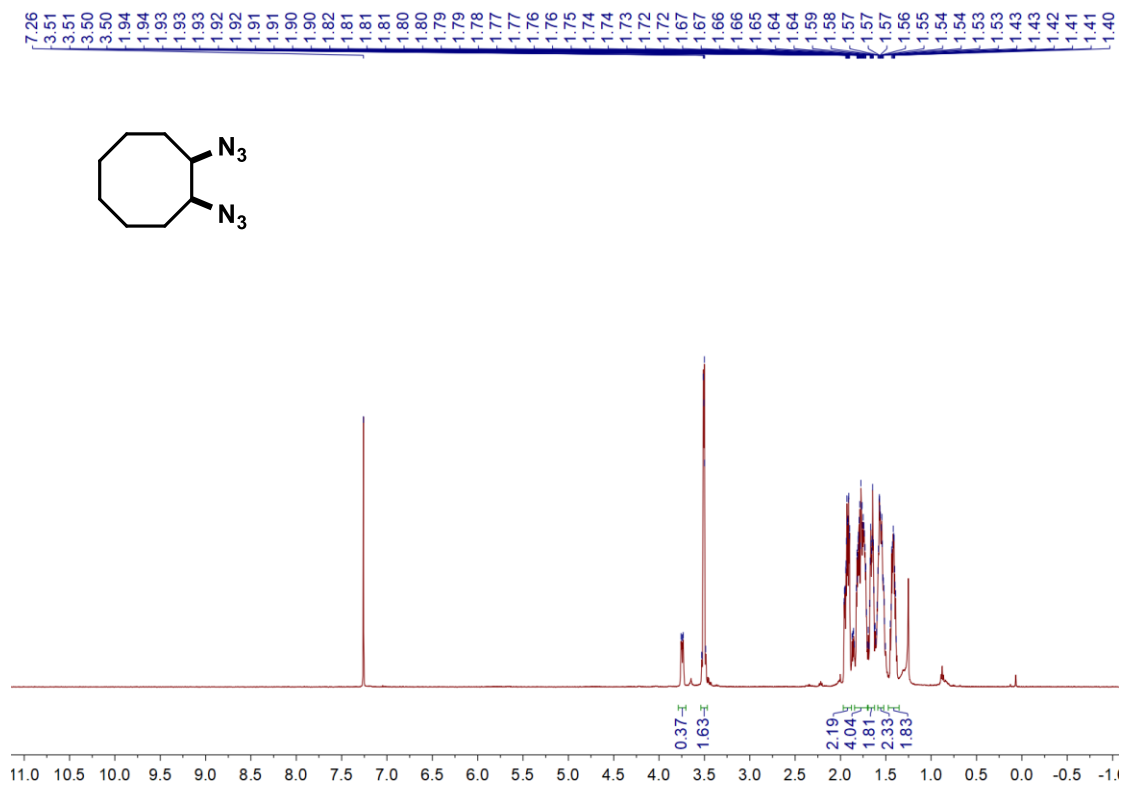

Supplementary Figure 56.  $^{13}\text{C}$  NMR (101 MHz,  $\text{CDCl}_3$ , 298K) of 1,2-diazidocyclooctane

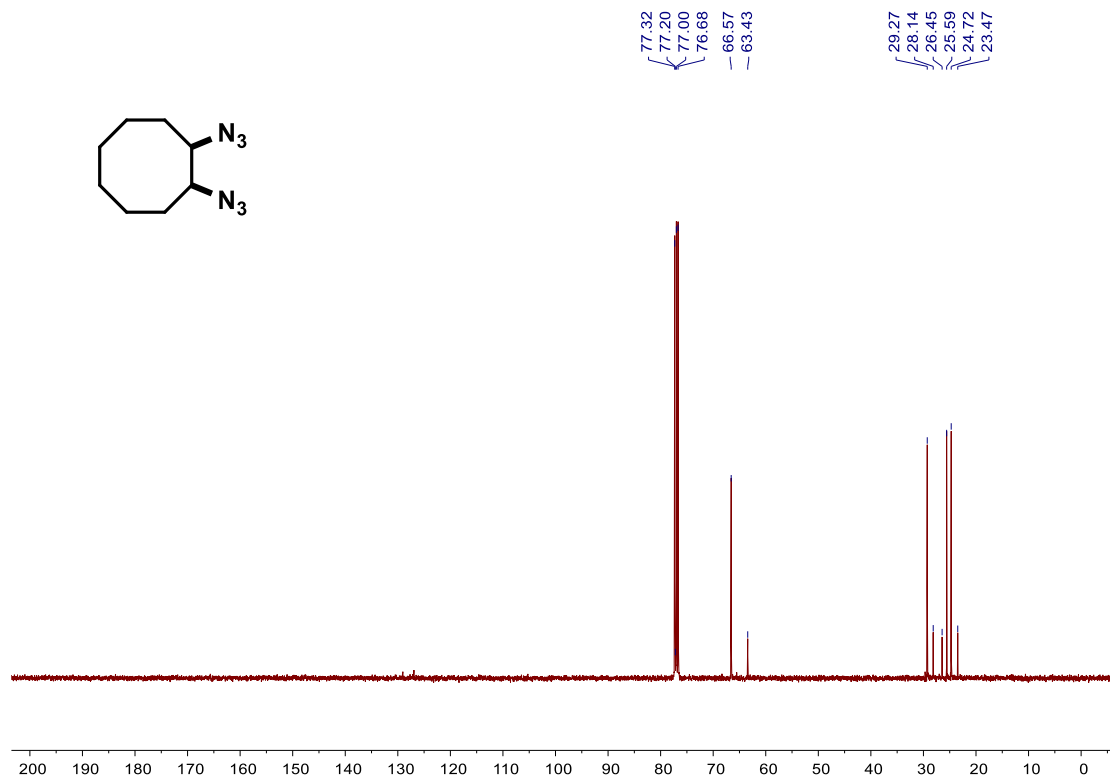



**Supplementary Figure 57.  $^1\text{H}$  NMR (500 MHz,  $\text{CDCl}_3$ , 298K) of 3,4-diazido-4-methylpentyl)benzene**

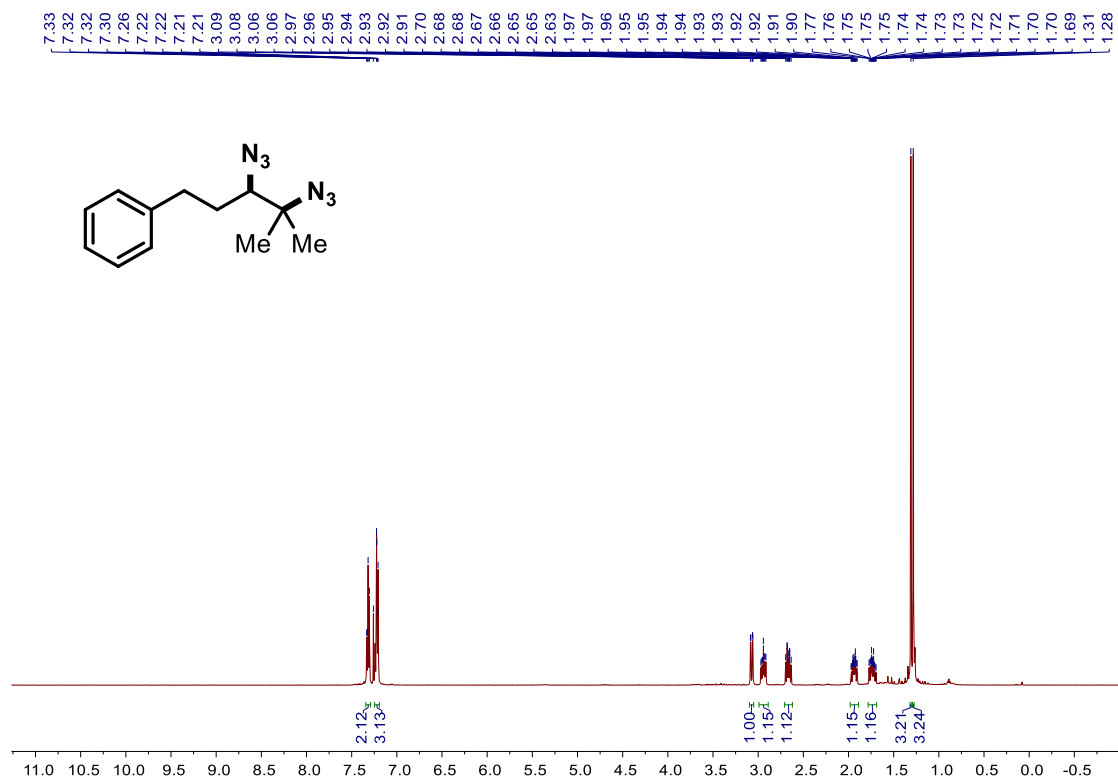

**Supplementary Figure 58.  $^{13}\text{C}$  NMR (101 MHz,  $\text{CDCl}_3$ , 298K) of 3,4-diazido-4-methylpentyl)benzene**

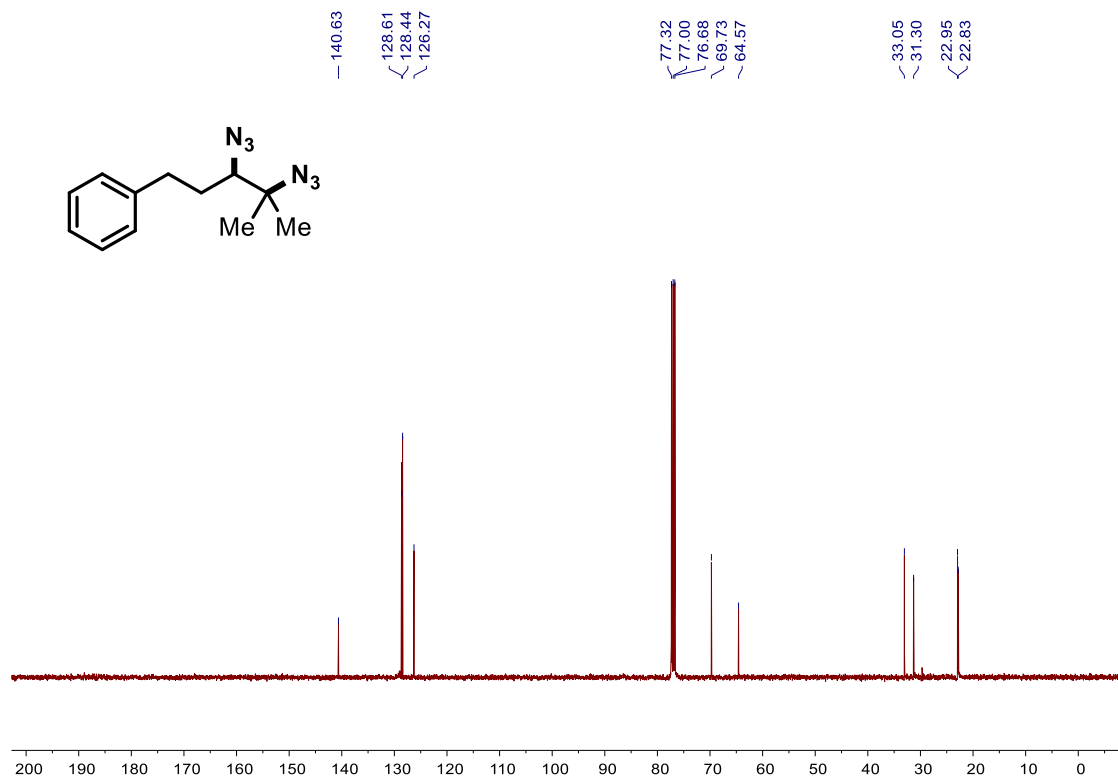

Supplementary Figure 59.  $^1\text{H}$  NMR (500 MHz,  $\text{CDCl}_3$ , 298K) of 1,2-diazoethylbenzene

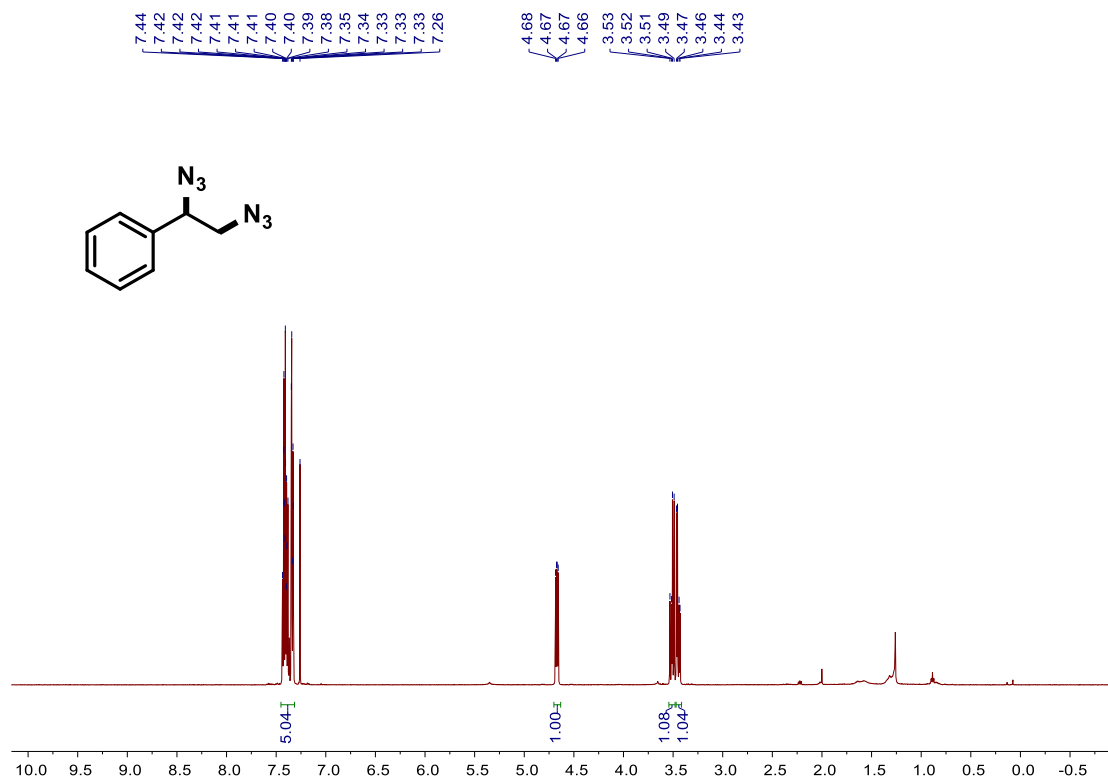

Supplementary Figure 60.  $^{13}\text{C}$  NMR (101 MHz,  $\text{CDCl}_3$ , 298K) of 1,2-diazoethylbenzene

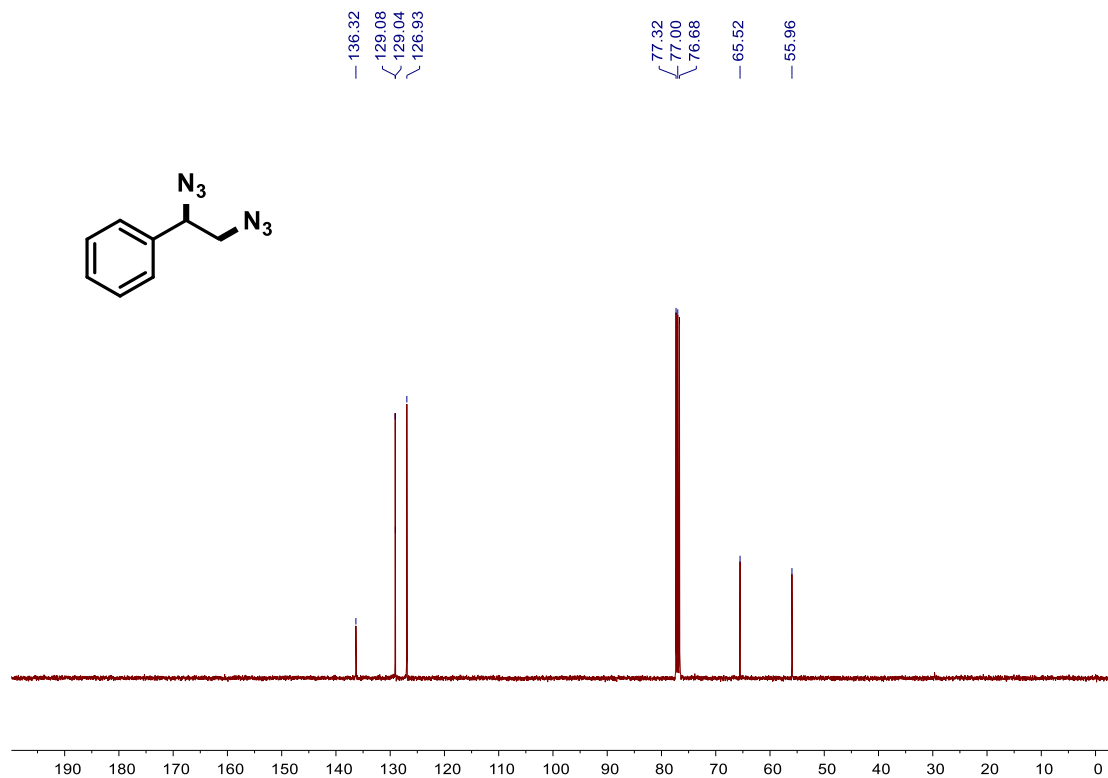

Supplementary Figure 61.  $^1\text{H}$  NMR (500 MHz,  $\text{CDCl}_3$ , 298K) of (1,2-diaziidoethyl)-4-methoxybenzene

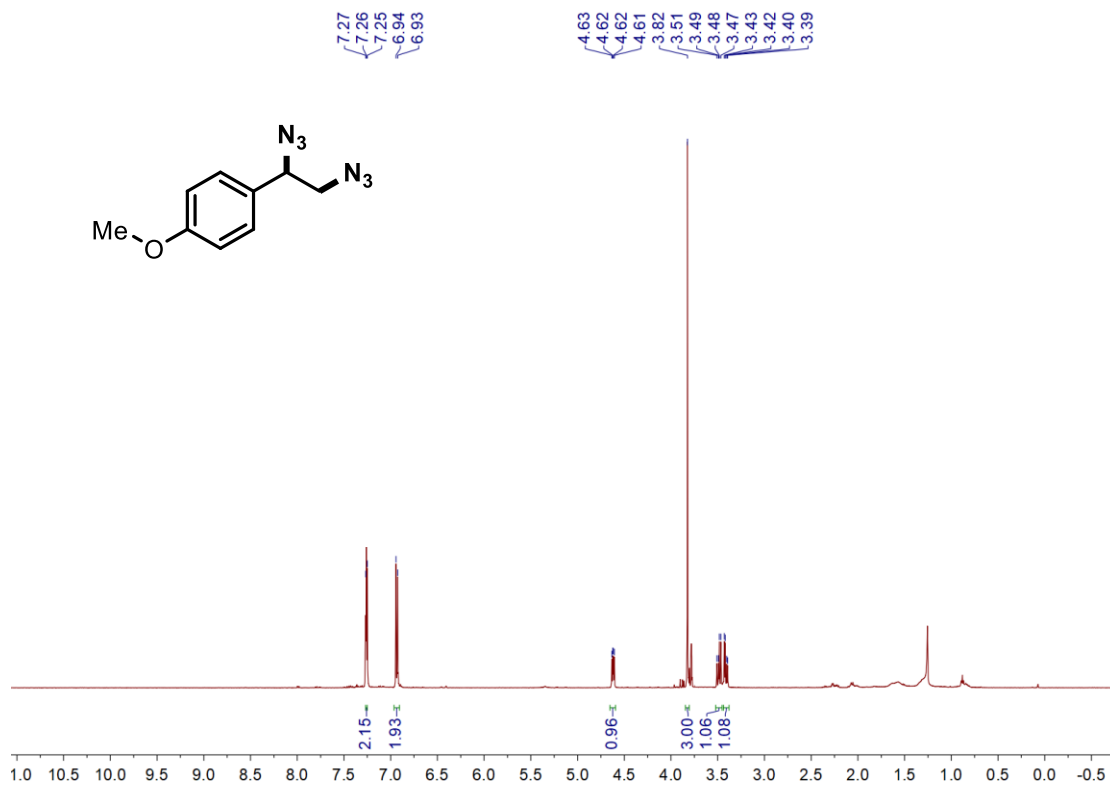

Supplementary Figure 62  $^{13}\text{C}$  NMR (101 MHz,  $\text{CDCl}_3$ , 298K) of (1,2-diaziidoethyl)-4-methoxybenzene

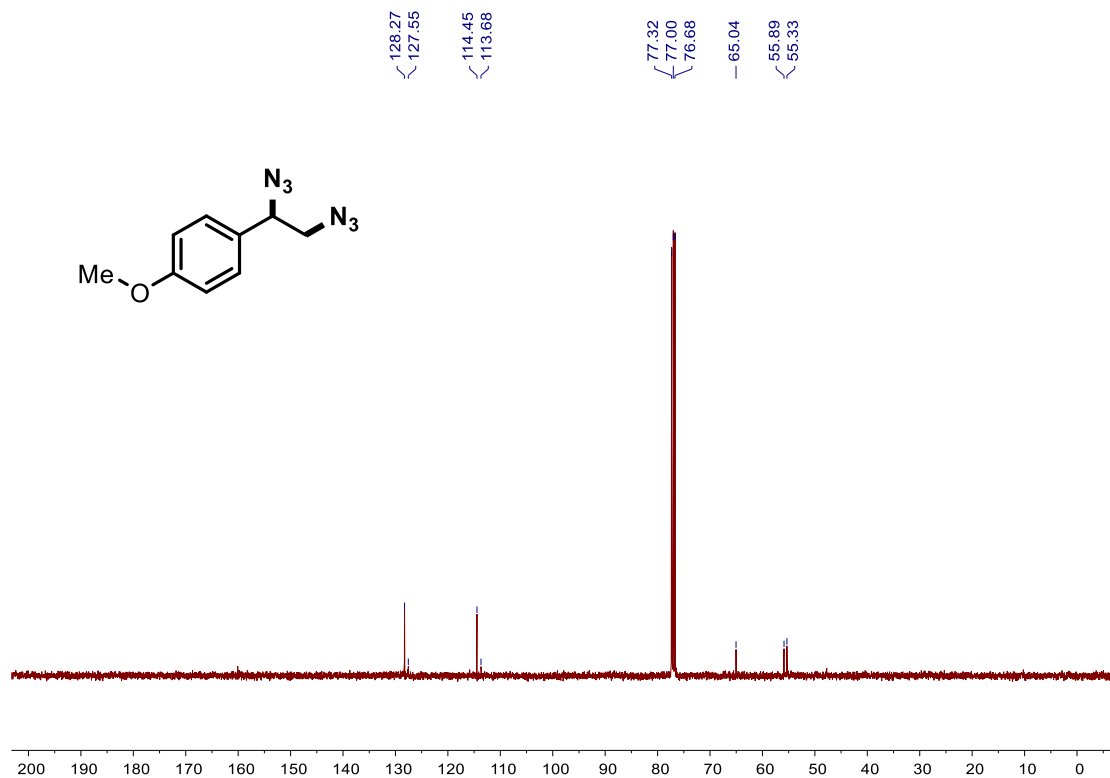

Supplementary Figure 63.  $^1\text{H}$  NMR (500 MHz,  $\text{CDCl}_3$ , 298K) of 4-(1,2-diazoethyl)phenyl acetate

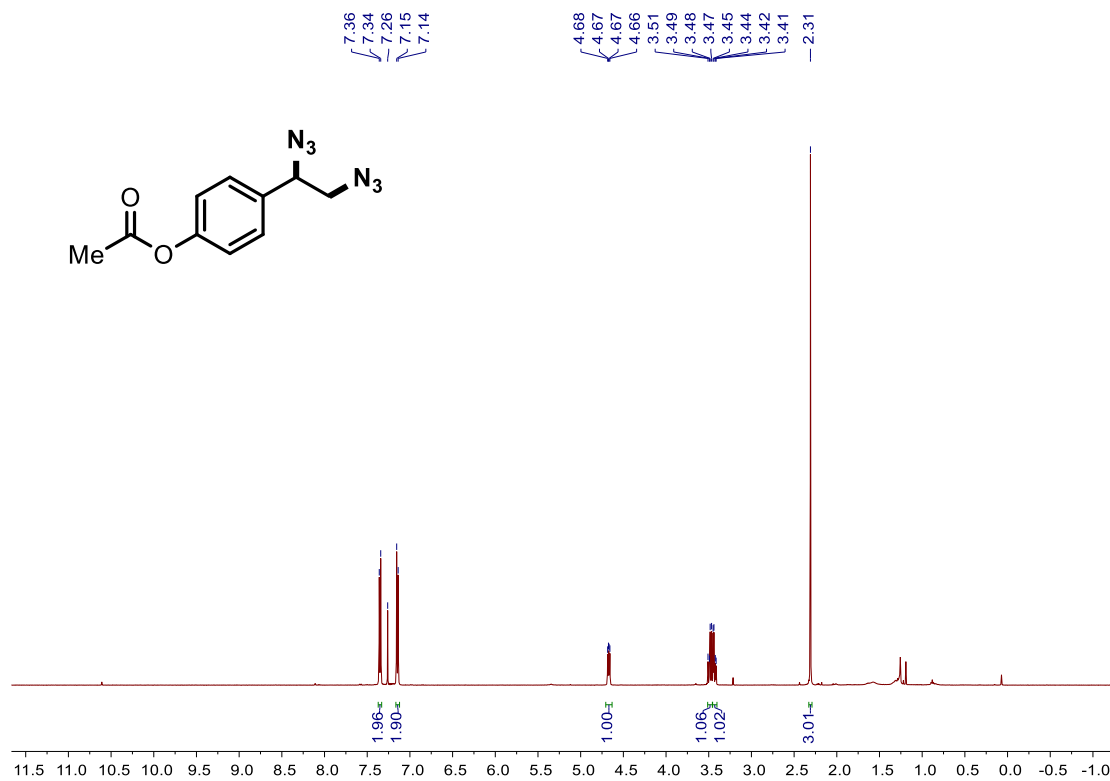

Supplementary Figure 64.  $^{13}\text{C}$  NMR (101 MHz,  $\text{CDCl}_3$ , 298K) of 4-(1,2-diazoethyl)phenyl acetate

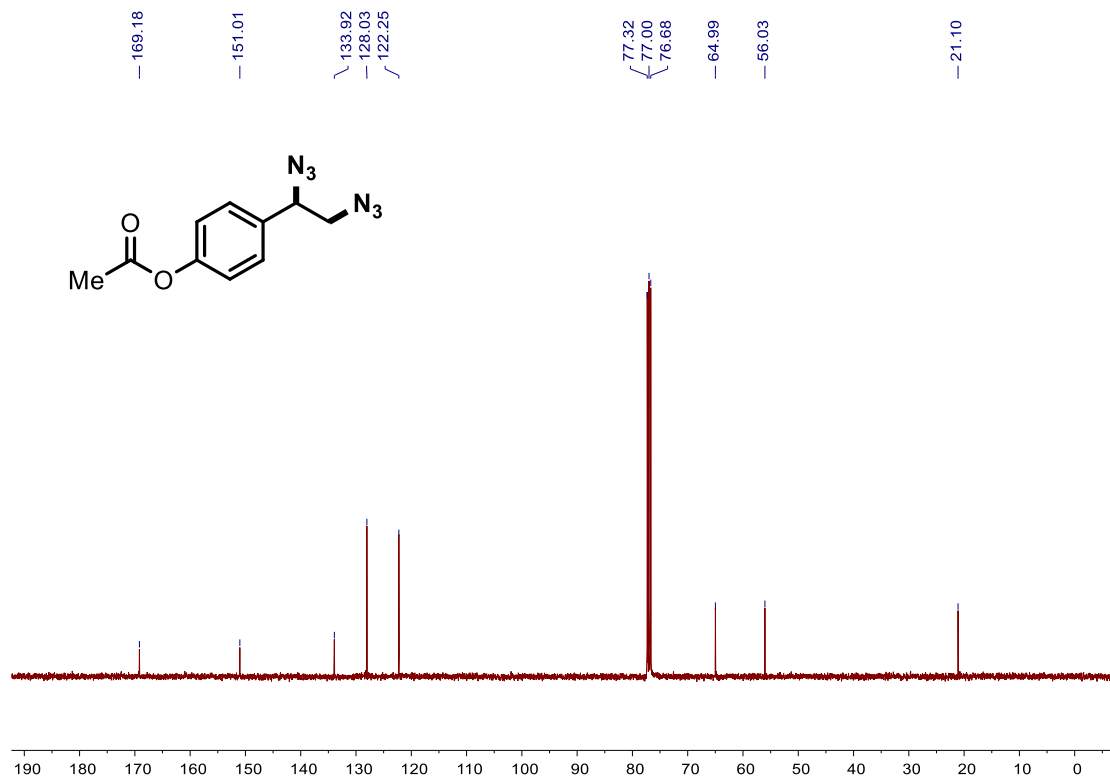

Supplementary Figure 65.  $^1\text{H}$  NMR (500 MHz,  $\text{CDCl}_3$ , 298K) of 1-bromo-4-(1,2-diazoethyl)benzene

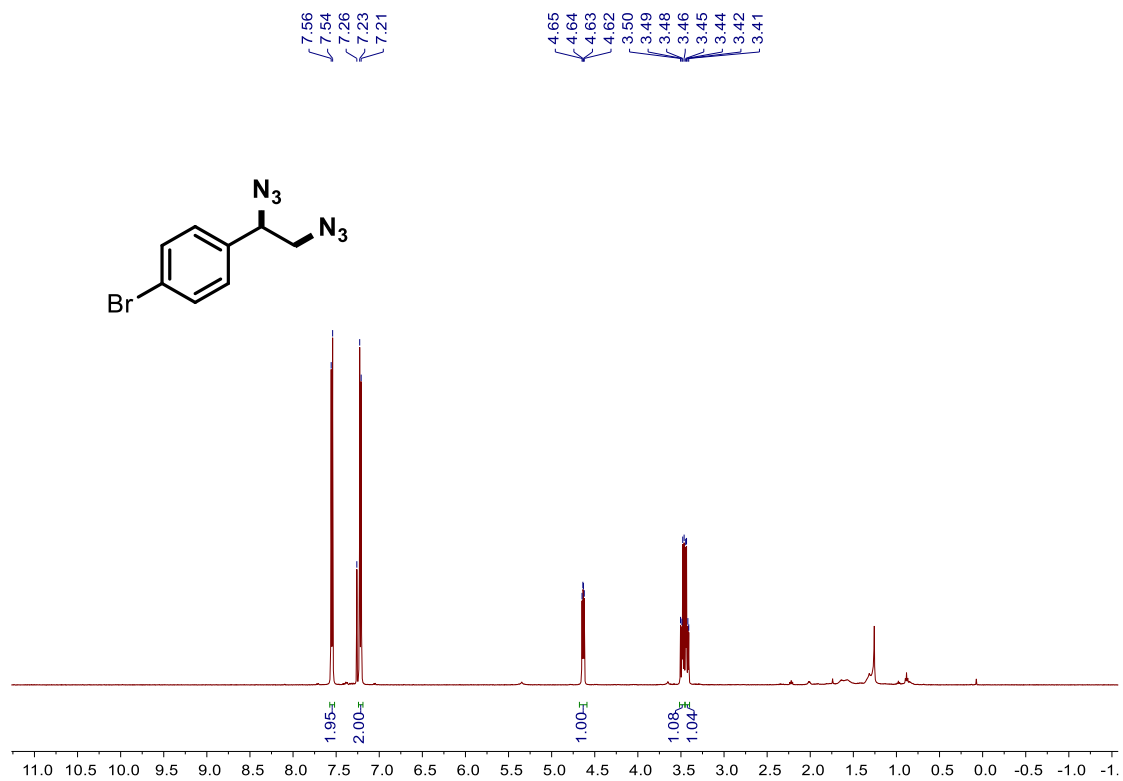

Supplementary Figure 66.  $^{13}\text{C}$  NMR (101 MHz,  $\text{CDCl}_3$ , 298K) of 1-bromo-4-(1,2-diazoethyl)benzene

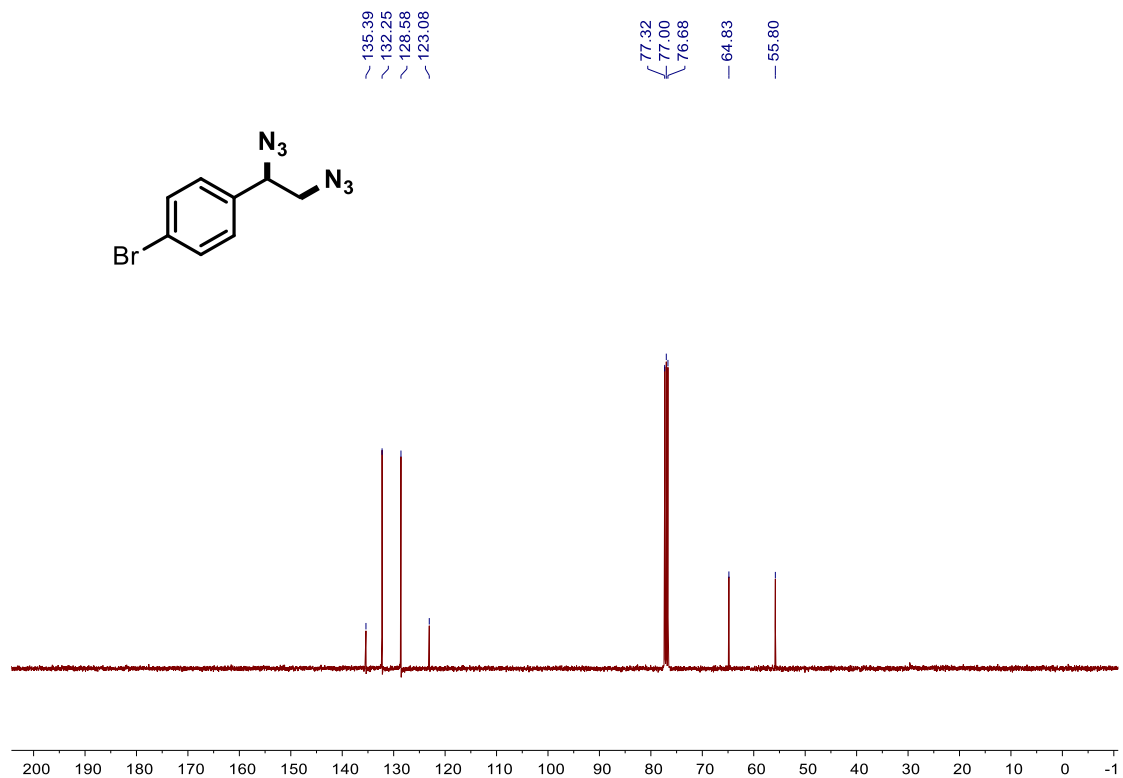

Supplementary Figure 67.  $^1\text{H}$  NMR (500 MHz,  $\text{CDCl}_3$ , 298K) of 1-chloro-3-(1,2-diazaethyl)benzene

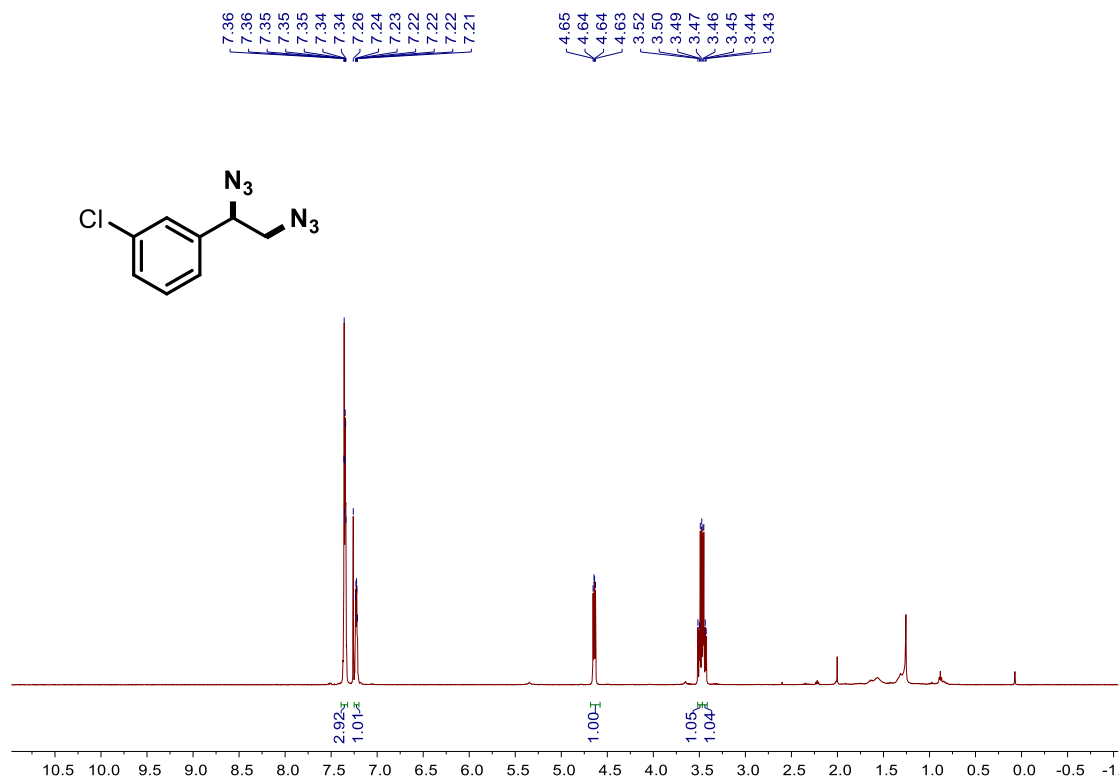

Supplementary Figure 68.  $^{13}\text{C}$  NMR (101 MHz,  $\text{CDCl}_3$ , 298K) of 1-chloro-3-(1,2-diazaethyl)benzene

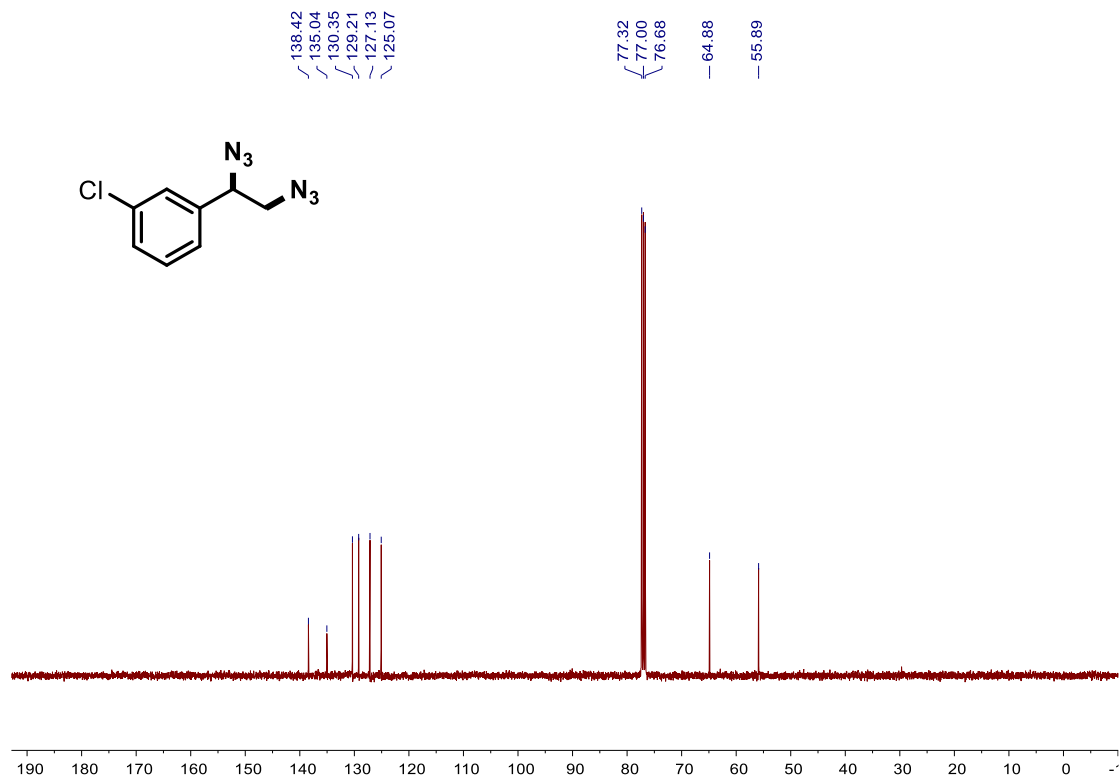

**Supplementary Figure 69.**  $^1\text{H}$  NMR (500 MHz,  $\text{CDCl}_3$ , 298K) of 1-chloro-2-(1,2-diazaethyl)benzene

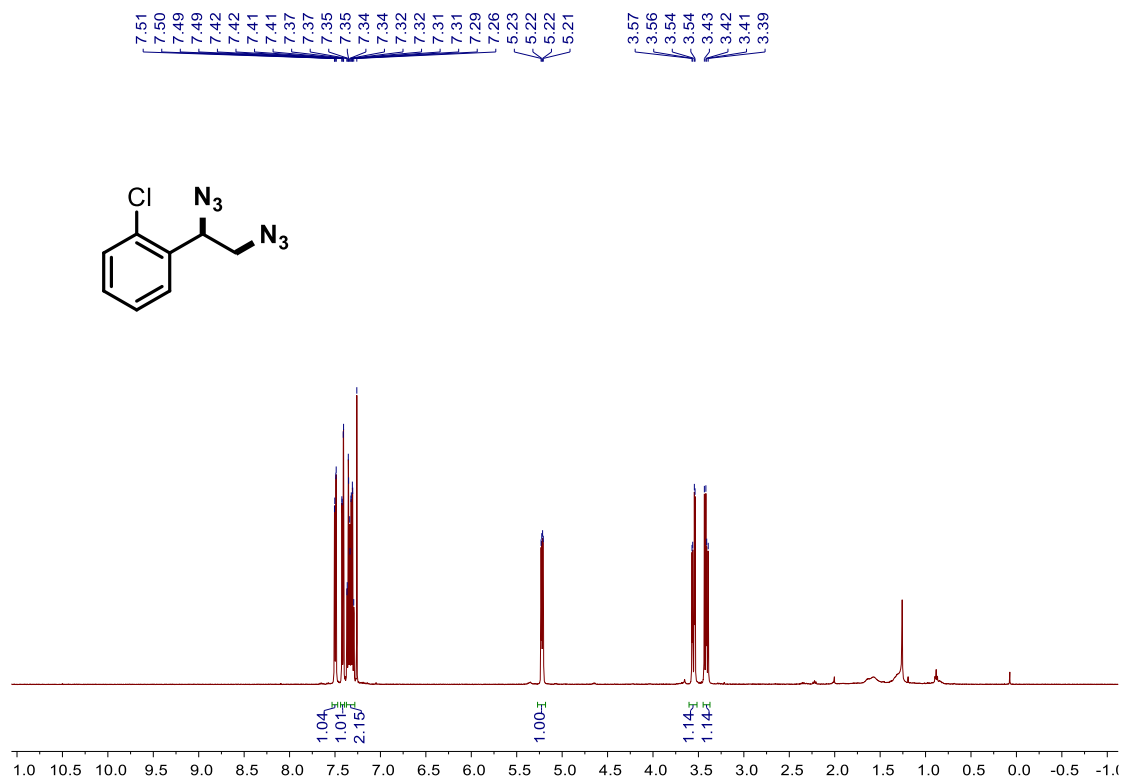

**Supplementary Figure 70.**  $^{13}\text{C}$  NMR (101 MHz,  $\text{CDCl}_3$ , 298K) of 1-chloro-2-(1,2-diazaethyl)benzene

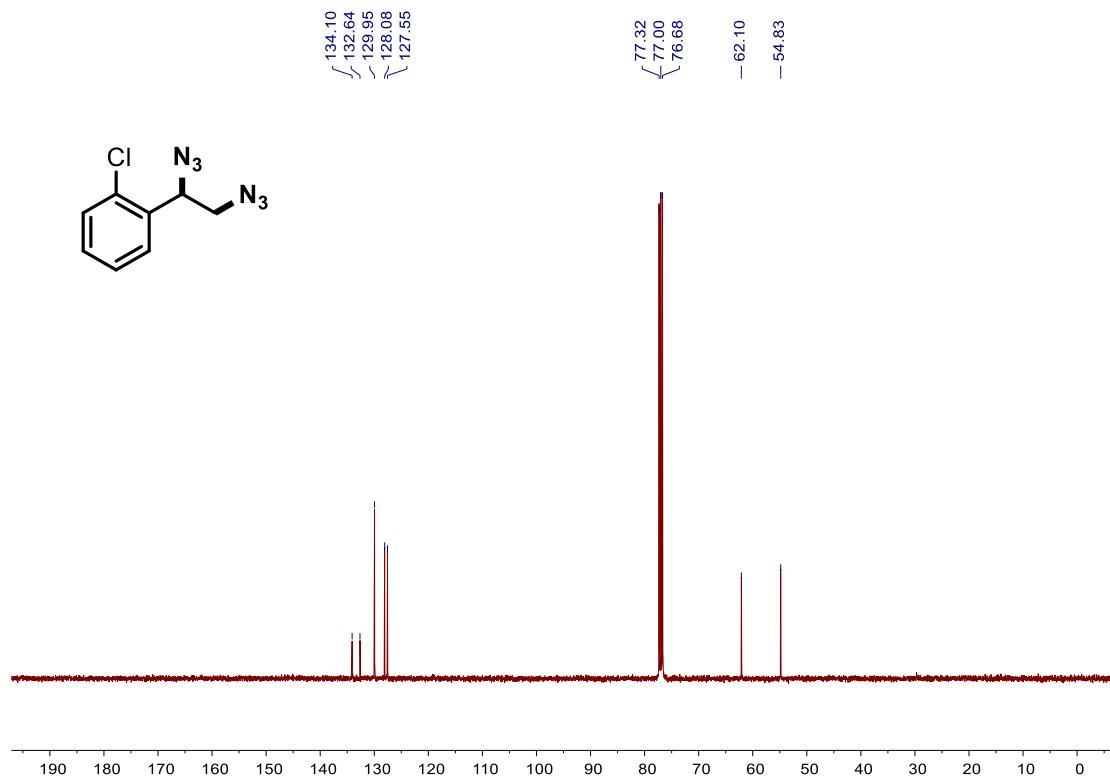

**Supplementary Figure 71. <sup>1</sup>H NMR (500 MHz, CDCl<sub>3</sub>, 298K) of 2-(1,2-diazaethyl)naphthalene**

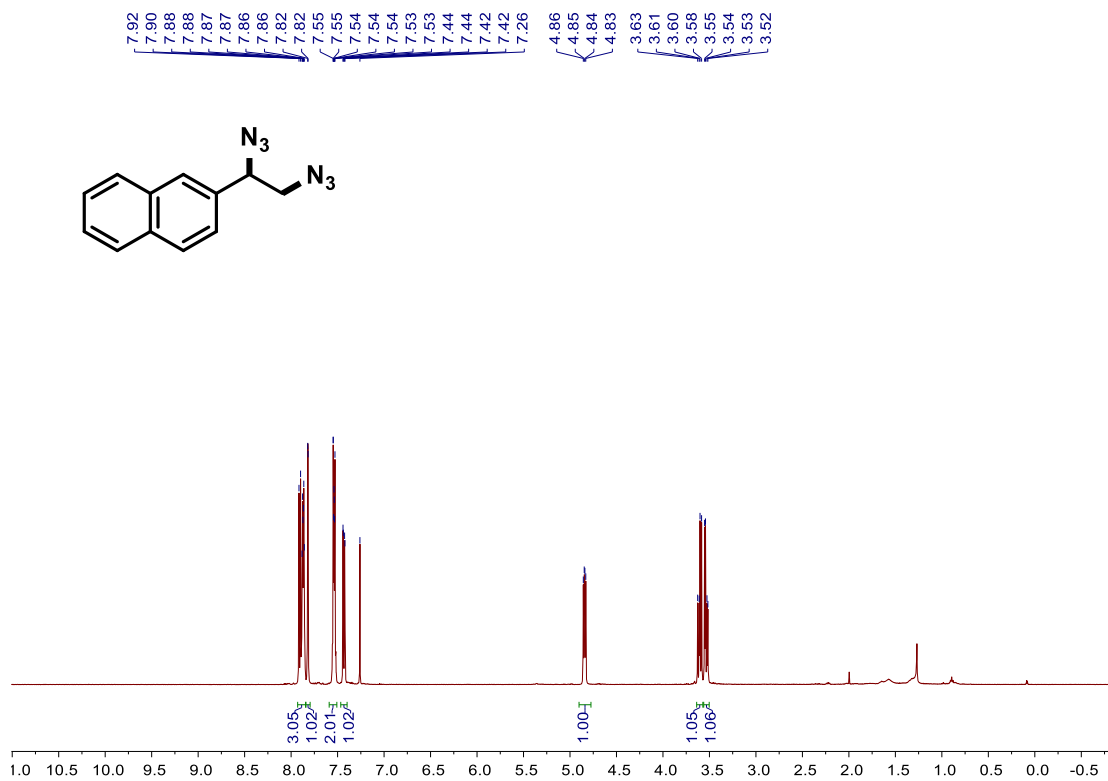

**Supplementary Figure 72. <sup>13</sup>C NMR (101 MHz, CDCl<sub>3</sub>, 298K) of 2-(1,2-diazaethyl)naphthalene**

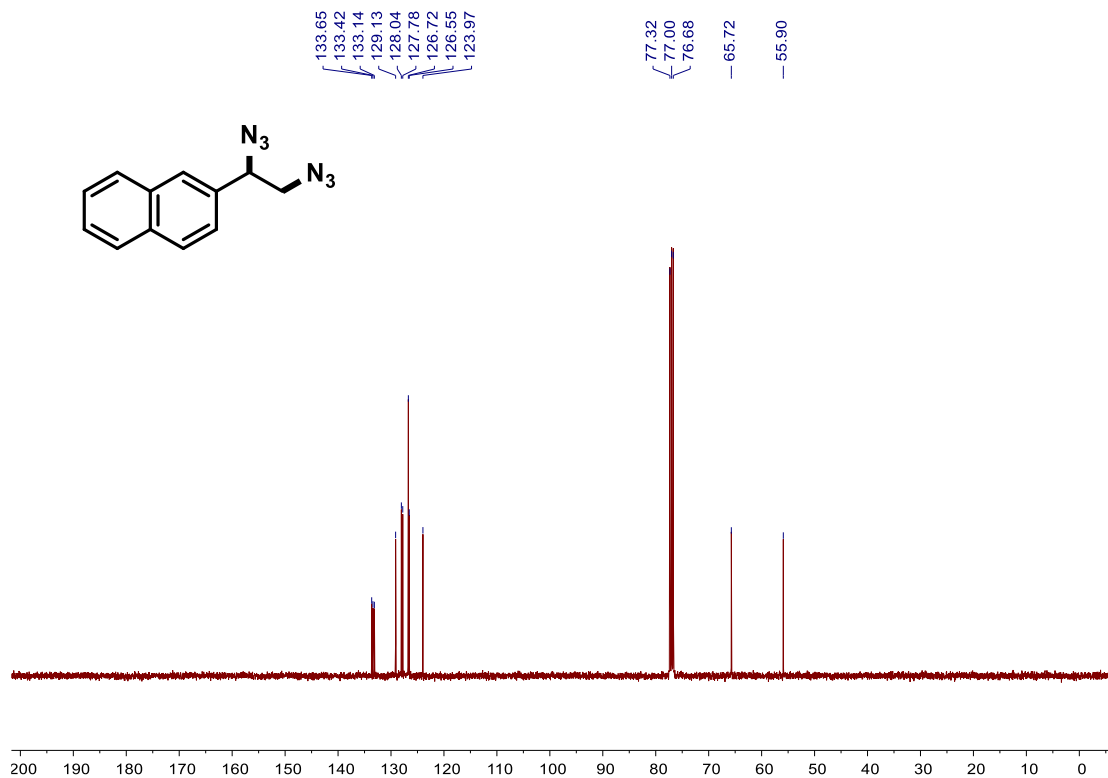



Supplementary Figure 73.  $^1\text{H}$  NMR (500 MHz,  $\text{CDCl}_3$ , 298K) of 1,2-diazidopropyl)benzene

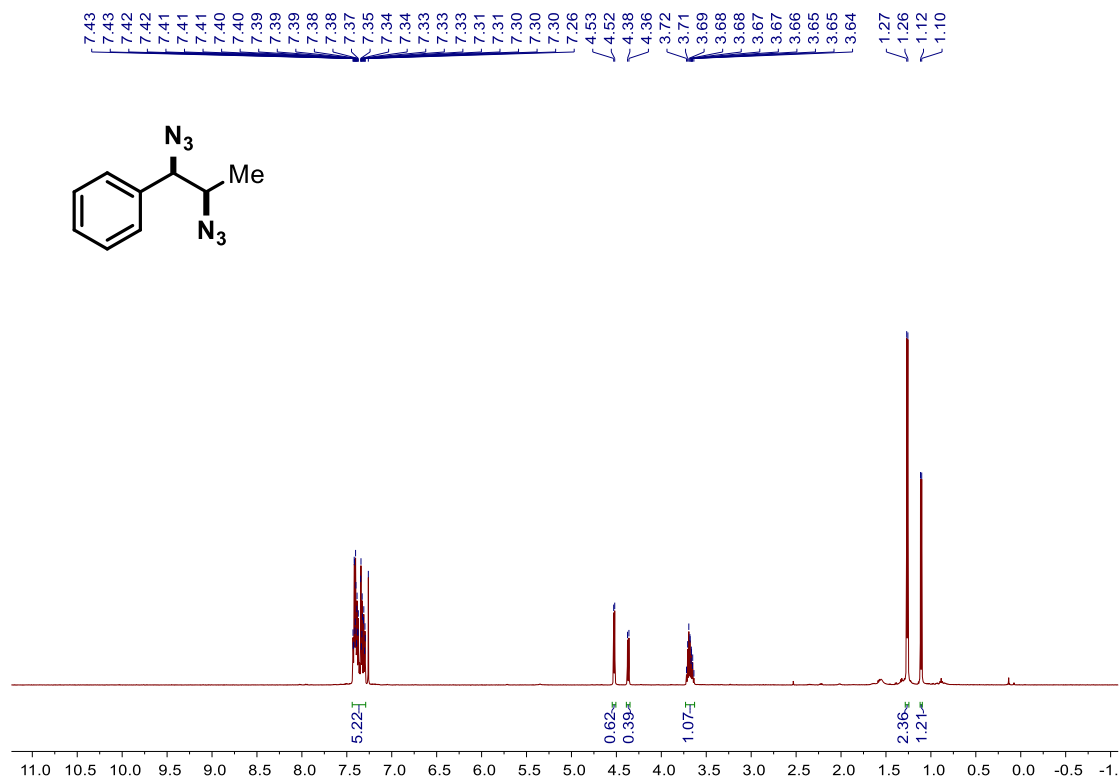

Supplementary Figure 74.  $^{13}\text{C}$  NMR (101 MHz,  $\text{CDCl}_3$ , 298K) of 1,2-diazidopropyl)benzene

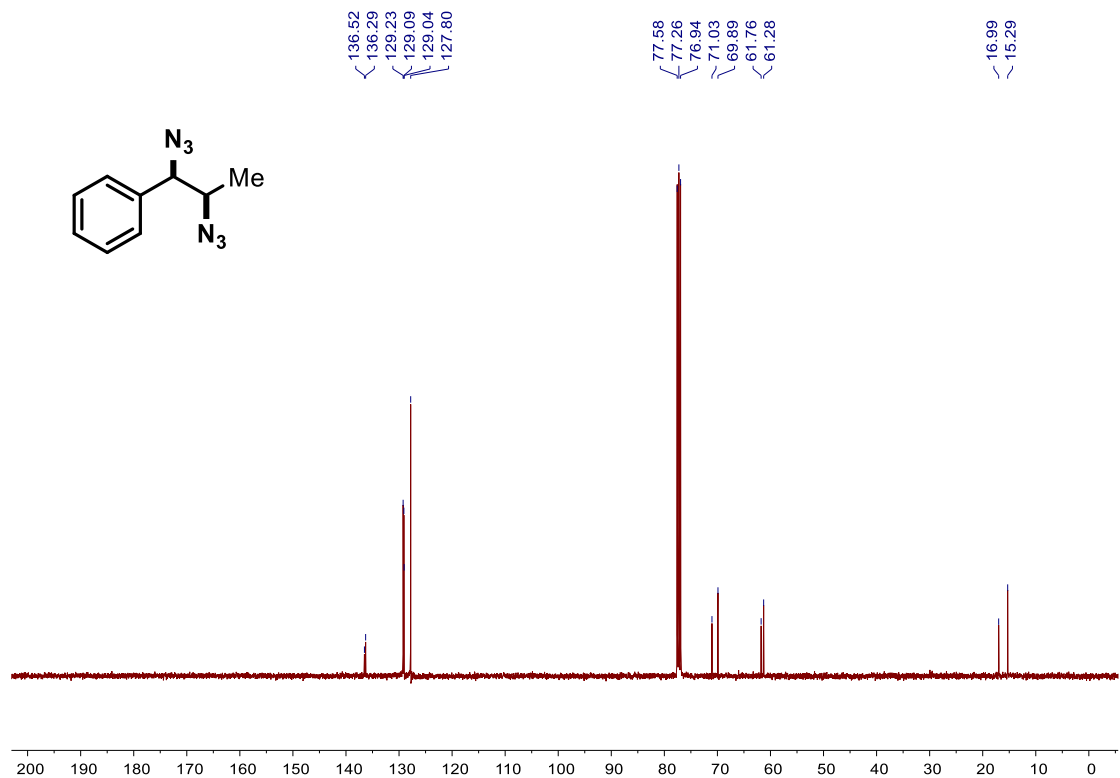

Supplementary Figure 75.  $^1\text{H}$  NMR (500 MHz,  $\text{CDCl}_3$ , 298K) of 1,2-diazido-1,2-diphenylethane

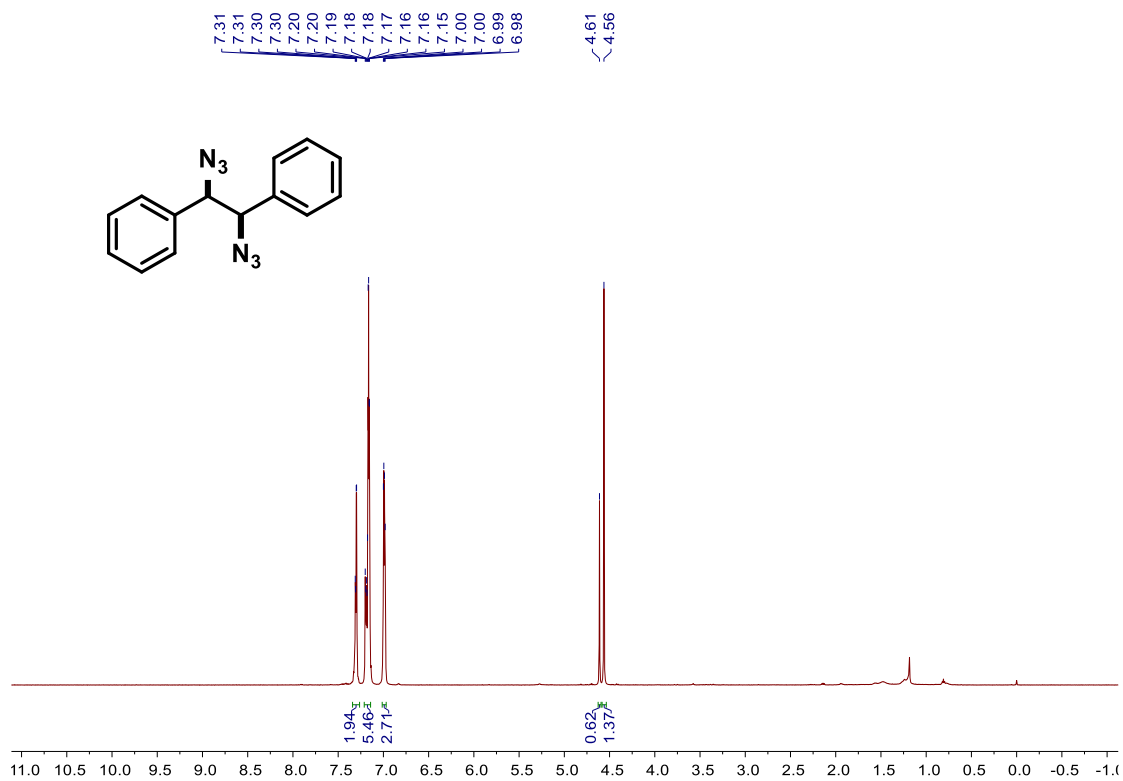

Supplementary Figure 76.  $^{13}\text{C}$  NMR (101 MHz,  $\text{CDCl}_3$ , 298K) of 1,2-diazido-1,2-diphenylethane

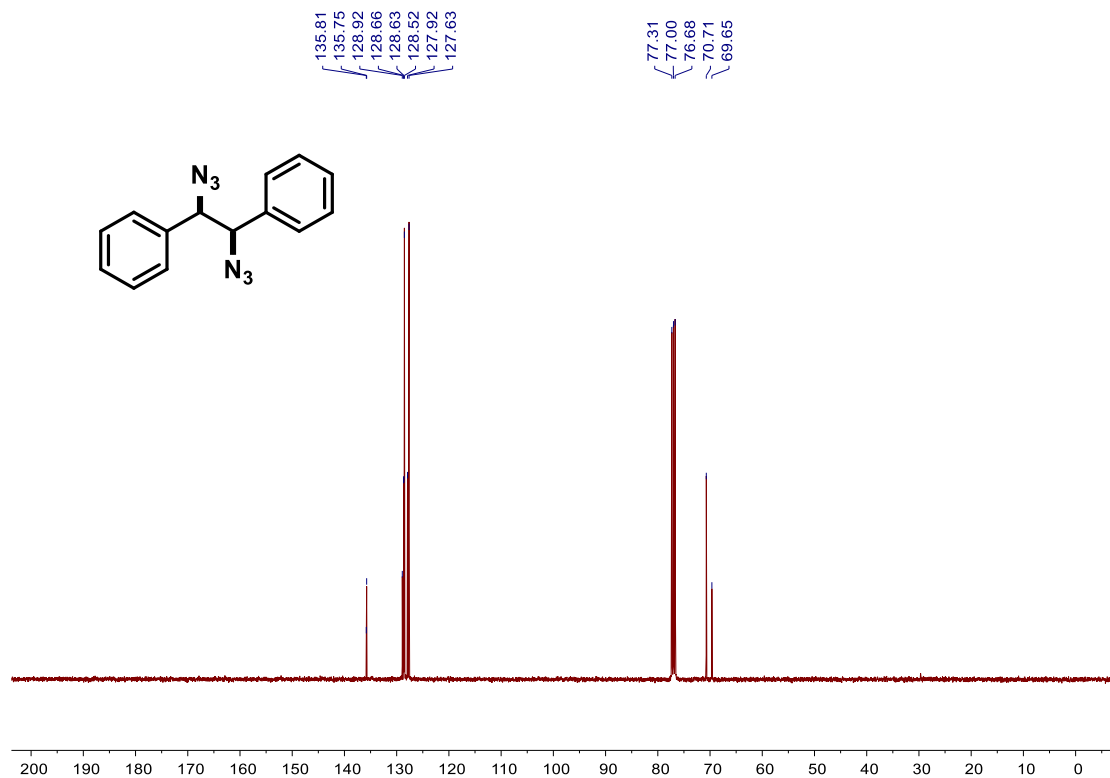

Supplementary Figure 77.  $^1\text{H}$  NMR (500 MHz,  $\text{CDCl}_3$ , 298K) of 1,2-diazido-1,2,3,4-tetrahydronaphthalene

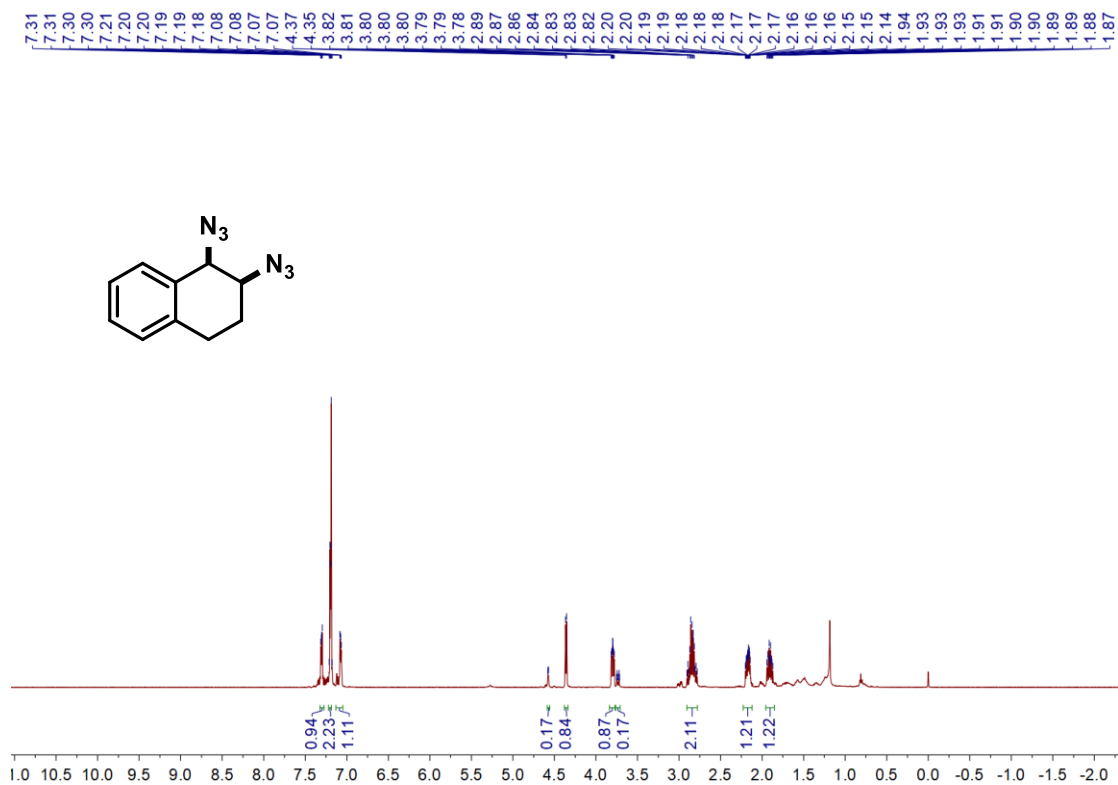

Supplementary Figure 78.  $^{13}\text{C}$  NMR (101 MHz,  $\text{CDCl}_3$ , 298K) of 1,2-diazido-1,2,3,4-tetrahydronaphthalene

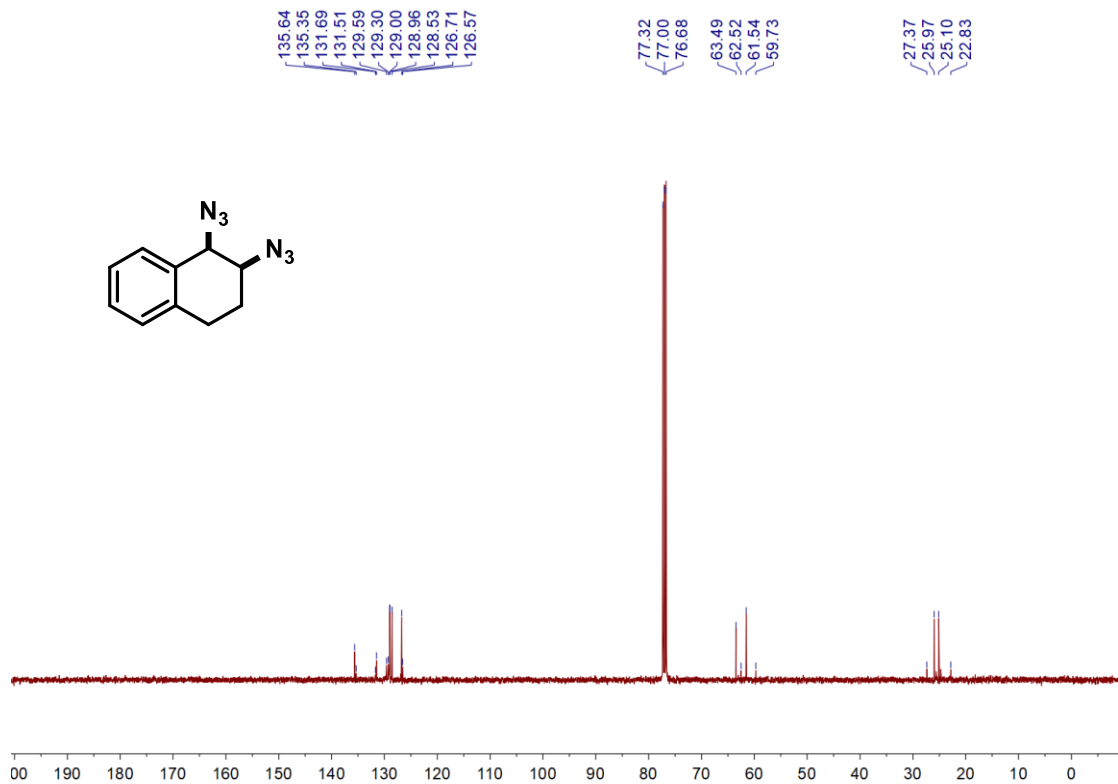

**Supplementary Figure 79. <sup>1</sup>H NMR (500 MHz, CDCl<sub>3</sub>, 298K) of (1R,2S,5R)-2-isopropyl-5-methylcyclohexyl 4,5-diazidopentanoate**

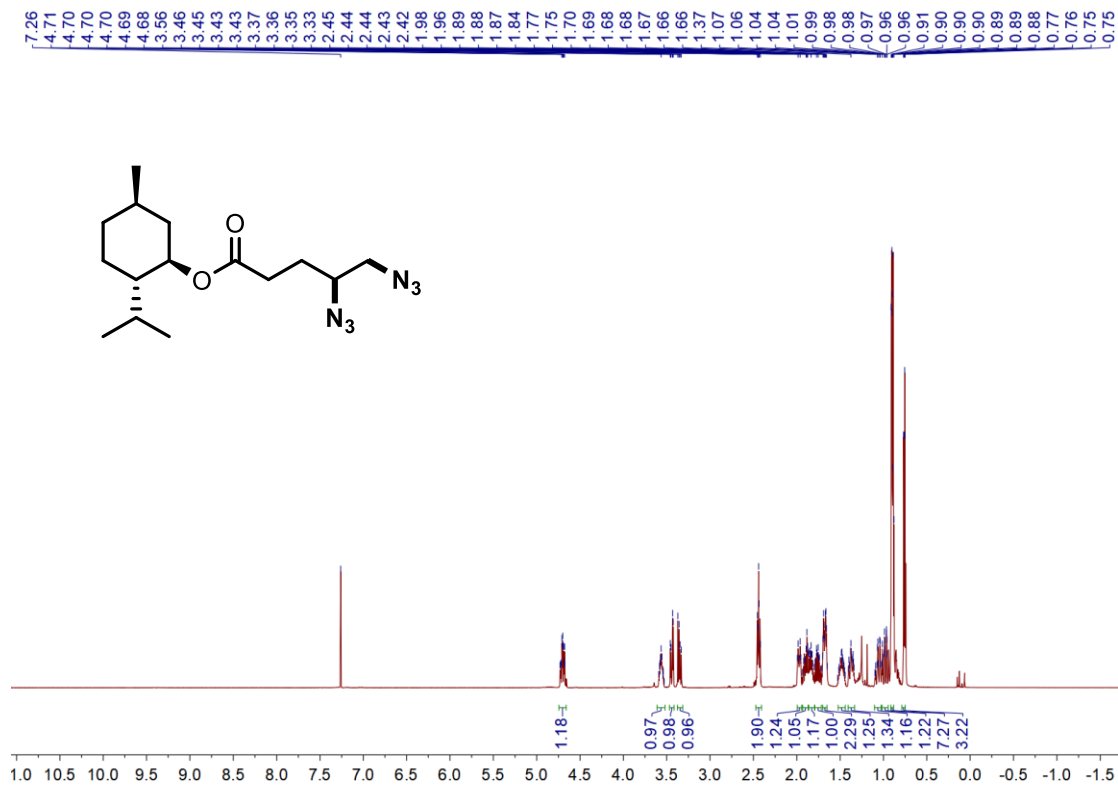

**Supplementary Figure 80. <sup>13</sup>C NMR (101 MHz, CDCl<sub>3</sub>, 298K) of (1R,2S,5R)-2-isopropyl-5-methylcyclohexyl 4,5-diazidopentanoate**

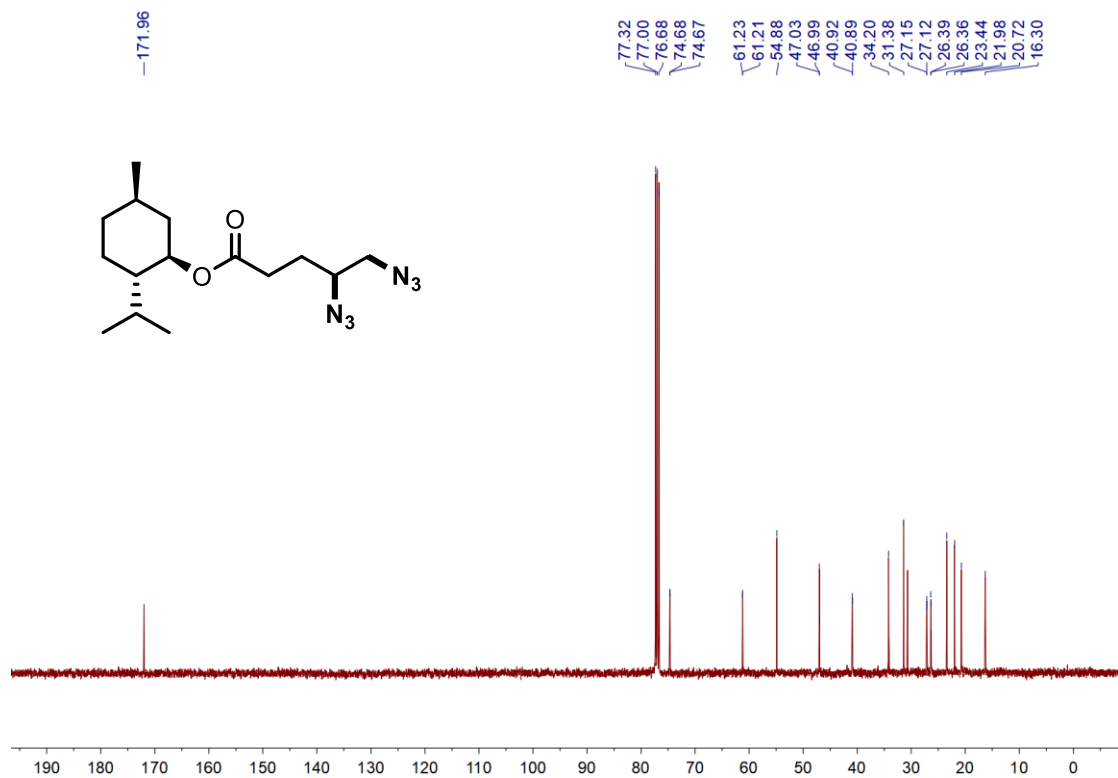

**Supplementary Figure 81.  $^1\text{H}$  NMR (500 MHz,  $\text{CDCl}_3$ , 298K) of 3,4-diazidobutyl 2-(4-isobutylphenyl)propanoate**

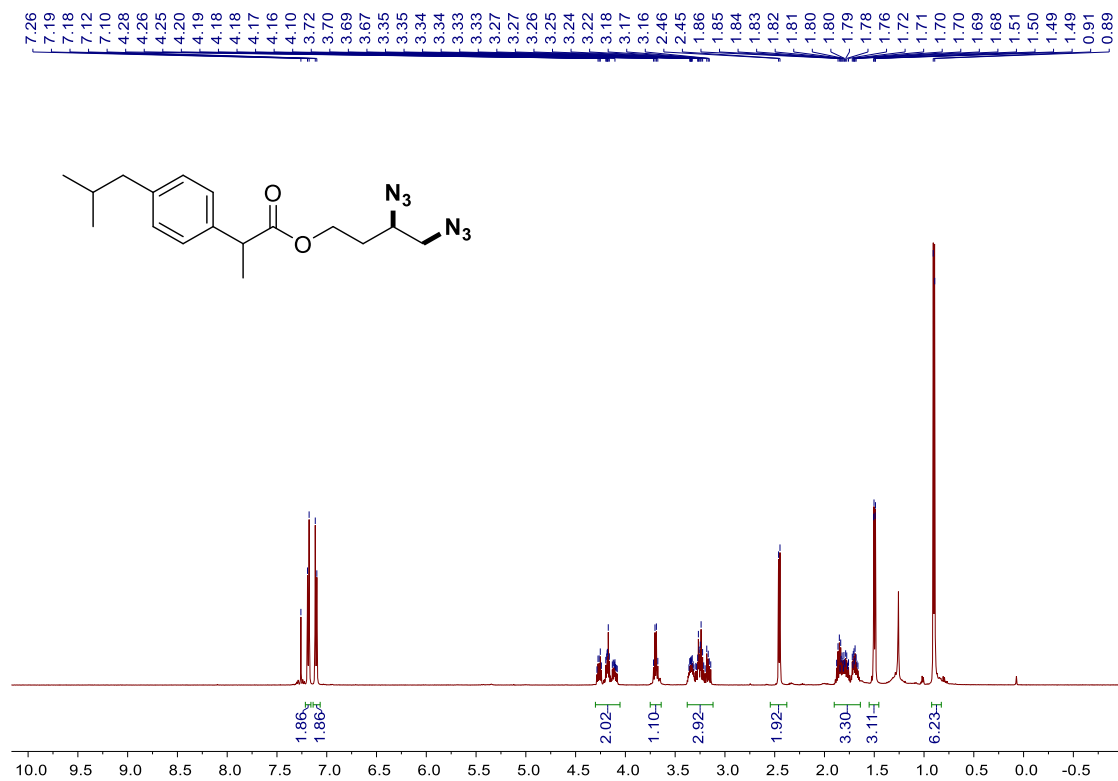

**Supplementary Figure 82.  $^{13}\text{C}$  NMR (101 MHz,  $\text{CDCl}_3$ , 298K) of 3,4-diazidobutyl 2-(4-isobutylphenyl)propanoate**

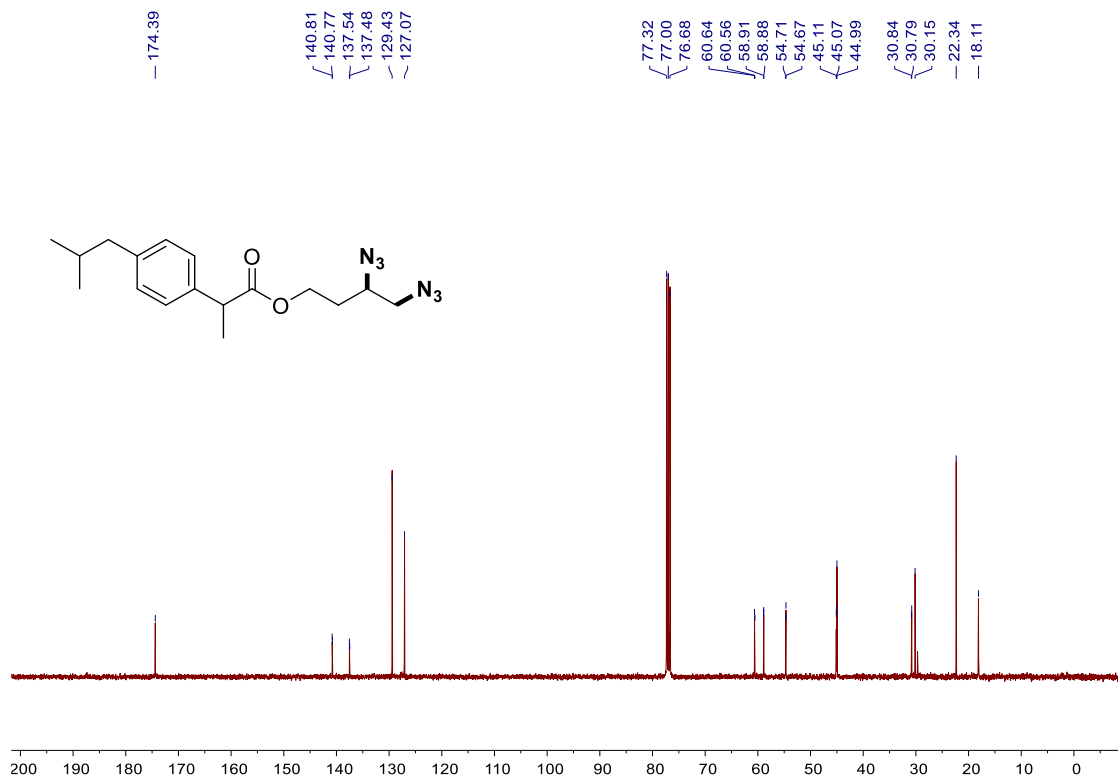

**Supplementary Figure 83.  $^1\text{H}$  NMR (500 MHz,  $\text{CDCl}_3$ , 298K) of 3,4-bis(azidomethyl)-1-tosylpyrrolidine**

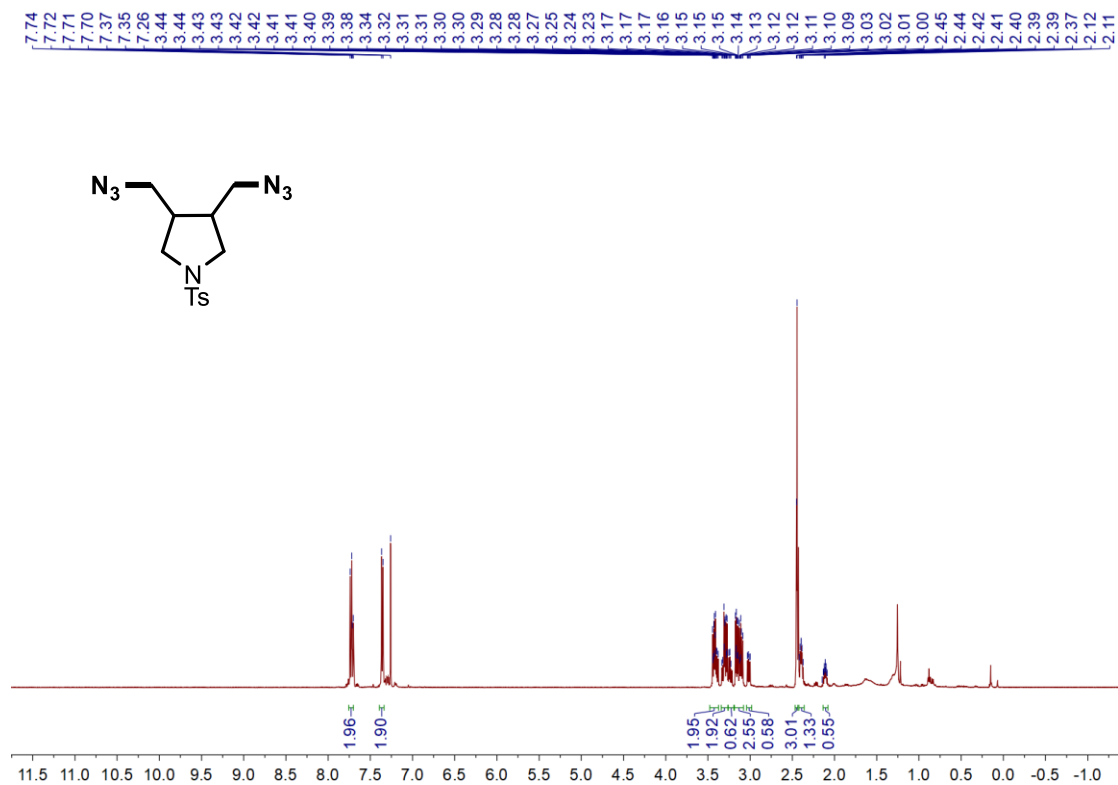

**Supplementary Figure 84.  $^{13}\text{C}$  NMR (101 MHz,  $\text{CDCl}_3$ , 298K) of 3,4-bis(azidomethyl)-1-tosylpyrrolidine**

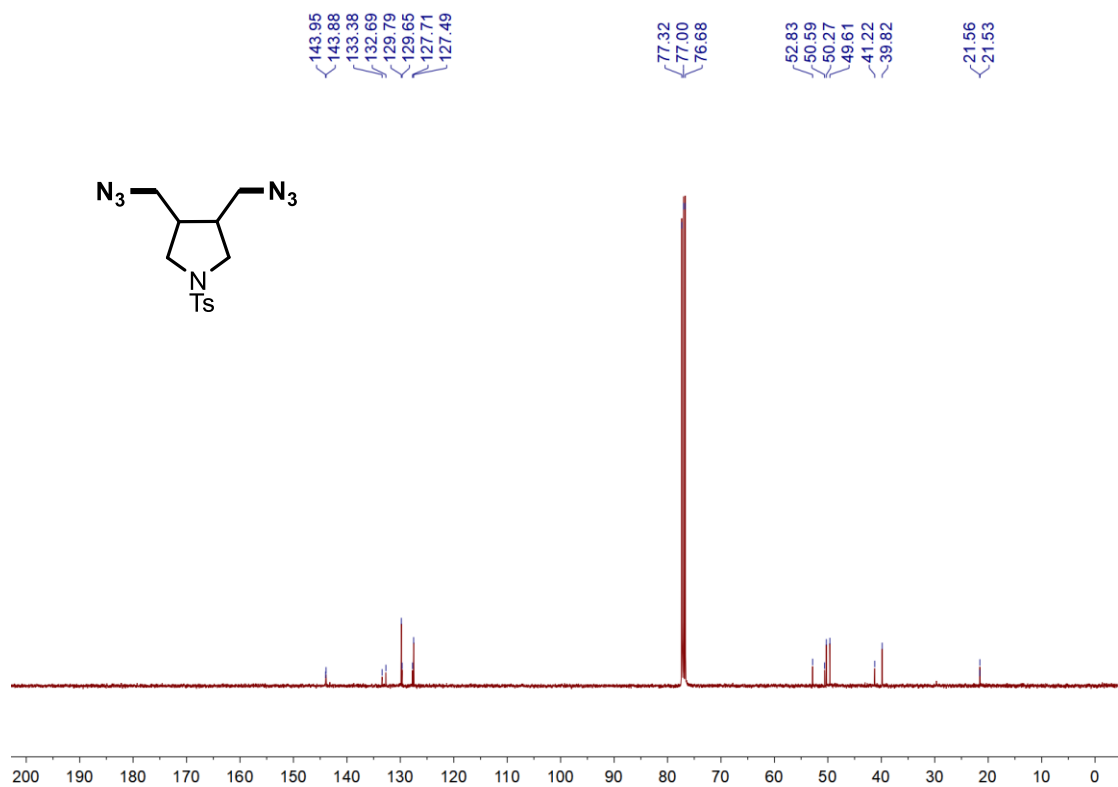

Supplement: 41467_2022_35344_MOESM1_ESM.pdf [file 41467_2022_35344_MOESM1_ESM.pdf]
